# Supplementary material
Source: publisher figshare collection journal article supplement (https://gsajournals.figshare.com/ndownloader/files/14084258)
Supplement: Supplementary file 1 [file 14084258]

## Sheet: Legend
Legend to Supplementary Table 1
Supplementary Table 1 contains raw OD650 measurements obtained for 1071 different AID-tagged strains cultivated for 20 and 40 hr at 30°C in SCD medium containing 0, 25, 100, or 400 µM auxin or 100 µM NAA.
The proteins were grouped into Essential and Non-essential categories based on published data [46] with manual adjustments.
Essential proteins that have C-termini sequestered within the endoplasmic reticulum, Golgi complex, mitochondria, or extracellular space were identified based on published experimental datasets [47], manual searches of published literature, or topology prediction using OCTOPUS [48].
The raw data were used to make Figure 1.
The median of all 313 non-essential proteins was calculated for each growth condition and the median-adjusted differences between any two conditions were calculated as follows: OD650(A)/median(A)-OD650(B)/median(B) where A and B are the two conditions and OD650 is the raw measurement for an AID-tagged protein. The indicated median-adjusted differences were tabulated and colorized on a scale from …
Primary Notes:
1	AID-tagged strains that have a noticeable growth defect when exposed to 25 µM auxin were identified by median-adjusted difference from 0 µM auxin greater than 0.080 at 20 hr or greater than 0.068 at 40 hr.
Secondary Notes:
2	EGO-GTR regulators of TORC1
3	Ser, Thr biosynthesis proteins
4	V-ATPase subunits
5	COG subunits
6	Growth inhibition by high auxin but not NAA
7	20S proteasome subunits
Supplementary References:
46	Liu G, Yong MY, Yurieva M, Srinivasan KG, Liu J, Lim JS, et al. Gene Essentiality Is a Quantitative Property Linked to Cellular Evolvability. Cell. 2015;163(6):1388-99.
47	Kim H, Melen K, Osterberg M, von Heijne G. A global topology map of the Saccharomyces cerevisiae membrane proteome. Proc Natl Acad Sci U S A. 2006;103(30):11142-7.
48	Viklund H, Elofsson A. OCTOPUS: improving topology prediction by two-track ANN-based preference scores and an extended topological grammar. Bioinformatics. 2008;24(15):1662-8.
Article Figures:

## Sheet: Table
									OD650:20 hr, RT, SCD, 36x dilution						OD650:40 hr, RT, SCD, 36x dilution						20 hr, median-adjusted differences					40 hr, median-adjusted differences
																					0 µM auxin	100 µM auxin	400 µM auxin	100 µM NAA		0 µM auxin	100 µM auxin	400 µM auxin	100 µM NAA		primary	secondary
Line No.	Rearray Coordinates	ORF	Gene	Status	Memb-Cterm	C-terminus	Reference		0 µM auxin	25 µM auxin	100 µM auxin	400 µM auxin	100 µM NAA		0 µM auxin	25 µM auxin	100 µM auxin	400 µM auxin	100 µM NAA		-25 µM auxin	-25 µM auxin	-25 µM auxin	-25 µM auxin		-25 µM auxin	-25 µM auxin	-25 µM auxin	-25 µM auxin		notes	notes
322	R02-H-06	YGL247W	BRR6	essential	ER-lumen	sequestered	Kops-4183		0.673	0.426	0.273	0.278	0.297		0.945	0.657	0.435	0.388	0.496		0.254755	-0.160507	-0.124767	-0.0757811		0.280729	-0.210093	-0.214305	-0.00369537		1
363	R04-H-05	YOR256C	TRE2	essential	ER-lumen	sequestered	Stimpson-662		0.513	0.307	0.253	0.239	0.253		1.012	0.847	0.765	0.738	0.59		0.213728	-0.0519553	-0.0419524	-0.00293473		0.149027	-0.0434557	0.0180175	-0.0736218		1
403	R03-C-12	YDR182W	CDC1	essential	ER-lumen	sequestered	Kim-11142		1.026	0.86	0.763	0.638	0.607		0.987	0.882	0.829	0.742	0.689		0.156233	-0.0840812	-0.156618	-0.143141		0.0862291	-0.00918414	-0.0140299	0.0272633		1
410	R06-B-09	YPR182W	SMX3	essential	ER-lumen	sequestered	Kim-11142		0.506	0.355	0.3	0.229	0.315		0.968	0.9	0.828	0.629	0.683		0.153271	-0.0516494	-0.107281	0.0263717		0.0475938	-0.0293252	-0.172909	-0.000120725		1
464	R06-F-07	YMR134W	ERG29	essential	ER-lumen	sequestered	octopus		0.853	0.747	0.707	0.648	0.572		0.958	0.919	0.885	0.785	0.693		0.0945973	-0.0229148	-0.019624	-0.0649736		0.0171893	0.0140646	7.58797e-05	-0.00627772		1
581	R01-E-08	YLR088W	GAA1	essential	ER-lumen	sequestered	Vainauskas-16402 Kim-11142		0.908	0.872	0.858	0.786	0.676		0.972	0.957	0.937	0.841	0.729		0.0159838	0.0102762	0.0137749	-0.0648595		-0.00853193	0.0318019	0.0292137	0.00369243
618	R01-C-10	YCL043C	PDI1	essential	ER-lumen	sequestered			0.861	0.852	0.846	0.766	0.679		0.977	0.966	0.942	0.848	0.729		-0.0125575	0.0187369	0.0110117	-0.03883		-0.0128857	0.0278561	0.0283633	-0.00582131
633	R01-D-08	YMR281W	GPI12	essential	ER-lumen	sequestered	Menon-151		0.94	0.888	0.877	0.778	0.676		0.959	0.95	0.928	0.829	0.714		0.0327889	0.0141532	-0.0137913	-0.0825001		-0.0145482	0.0291792	0.0217618	-0.00979936
663	R01-A-09	YJL034W	KAR2	essential	ER-lumen	sequestered			0.475	0.469	0.566	0.526	0.416		0.859	0.856	0.838	0.76	0.615		-0.00578683	0.123907	0.135516	0.0346348		-0.0183817	0.0283223	0.0357315	-0.0483166
664	R05-E-03	YOR336W	KRE5	essential	ER-lumen	sequestered			0.972	0.981	0.947	0.842	0.759		0.986	0.98	0.939	0.849	0.739		-0.0353013	-0.00910747	-0.0369226	-0.0749564		-0.0183969	0.00971621	0.0148018	-0.00669289
732	R07-G-03	YLR066W	SPC3	essential	ER-lumen	sequestered			0.869	0.905	0.865	0.82	0.735		0.95	0.96	0.926	0.809	0.726		-0.0623805	-0.01818	0.0195748	-0.0229939		-0.034407	0.0163812	-0.0135615	-0.00365709
736	R07-F-03	YDR498C	SEC20	essential	ER-lumen	sequestered			0.951	0.969	0.927	0.833	0.773		0.958	0.969	0.93	0.796	0.712		-0.0446758	-0.0185271	-0.0348585	-0.0431583		-0.0356648	0.0113218	-0.0391644	-0.0326694
747	R07-B-09	YNR026C	SEC12	essential	ER-lumen	sequestered	Nakano-851		0.583	0.65	0.636	0.621	0.532		0.918	0.943	0.921	0.806	0.702		-0.0890918	0.00362351	0.0538232	-0.011078		-0.0494603	0.0287837	0.000696	-0.0191129
552	R01-F-03	YHR166C	CDC23	essential	GC-lumen	sequestered			0.911	0.909	0.872	0.832	0.763		0.97	0.95	0.93	0.833	0.713		-0.0215807	-0.0146626	0.030053	0.00973127		-0.00319634	0.0314064	0.0267123	-0.0111921
584	R01-F-04	YKL006C-A	SFT1	essential	GC-lumen	sequestered			0.703	0.719	0.699	0.673	0.58		0.919	0.906	0.866	0.763	0.649		-0.0359956	-0.00110378	0.0422643	-0.0234925		-0.00931629	0.00664855	-0.0134098	-0.053817
637	R02-B-05	YLR026C	SED5	essential	GC-lumen	sequestered			0.708	0.703	0.681	0.634	0.567		0.887	0.88	0.848	0.753	0.669		-0.0129729	-0.00384826	0.0115178	-0.0230933		-0.0148559	0.0140882	0.00169813	0.00152232
333	R07-A-06	YPL063W	TIM50	essential	MT-IM	sequestered			0.823	0.578	0.529	0.445	0.507		0.956	0.876	0.855	0.751	0.698		0.248633	-0.0381717	-0.0851565	0.0351481		0.0605799	0.0261116	0.00345122	0.0461406		1
441	R02-B-10	YJL143W	TIM17	essential	MT-IM	sequestered			0.662	0.538	0.507	0.55	0.482		0.884	0.814	0.796	0.751	0.654		0.11943	-0.0189853	0.0892179	0.046093		0.0518156	0.0259491	0.0689903	0.0503984		1
544	R06-B-10	YER048W-A	ISD11	essential	MT-IM	sequestered			0.931	0.941	0.923	0.839	0.766		0.963	0.942	0.907	0.769	0.716		-0.0353334	0.00781389	0.00345671	-0.0215711		-0.00196362	0.0142506	-0.044039	0.00144281
611	R06-G-11	YNL310C	ZIM17	essential	MT-IM	sequestered			0.705	0.758	0.71	0.692	0.651		0.943	0.932	0.901	0.801	0.755		-0.0768416	-0.0316452	0.0228386	0.0276731		-0.0120326	0.0181399	0.00613579	0.0663312
689	R05-C-11	YNR017W	TIM23	essential	MT-IM	sequestered			0.771	0.783	0.739	0.697	0.66		0.922	0.92	0.902	0.841	0.739		-0.0333609	-0.026366	0.00147871	0.012046		-0.0210195	0.0319385	0.0683257	0.0567321
701	R06-C-03	YDR308C	SRB7	essential	MT-IM	sequestered			0.925	0.945	0.921	0.846	0.759		0.953	0.952	0.912	0.798	0.721		-0.0462021	0.00113875	0.00773143	-0.0352651		-0.0228544	0.00924771	-0.0187187	-0.00216422
705	R03-F-03	YGR046W	TAM41	essential	MT-IM	sequestered			0.859	0.873	0.824	0.706	0.65		0.979	0.978	0.933	0.844	0.756		-0.0378636	-0.0293314	-0.0865833	-0.100445		-0.0235067	0.00514886	0.0107278	0.0190982
729	R07-F-02	YOR176W	HEM15	essential	MT-IM	sequestered			0.944	0.964	0.921	0.834	0.787		1.007	1.012	0.965	0.822	0.75		-0.0466981	-0.0198094	-0.0281051	-0.019078		-0.0305518	0.0048428	-0.0524407	-0.0251992
583	R03-G-10	YKL195W	MIA40	essential	MT-IMS	sequestered			0.88	0.892	0.866	0.757	0.69		0.975	0.96	0.919	0.826	0.745		-0.0362068	-0.00271451	-0.044256	-0.0683426		-0.0086072	0.00858615	0.00747807	0.0228053
587	R06-A-11	YMR301C	ATM1	essential	MT-IMS	sequestered			0.995	0.992	0.96	0.883	0.828		0.965	0.951	0.917	0.788	0.729		-0.0226714	-0.00651283	0.00181795	0.00442769		-0.00941338	0.0158727	-0.0300379	0.0100349
605	R01-C-04	YLR355C	ILV5	essential	MT-matrix	sequestered			0.931	0.871	0.885	0.787	0.728		0.969	0.957	0.927	0.829	0.717		0.0418441	0.0419563	0.0161181	0.00520853		-0.0116279	0.0206661	0.0143622	-0.0130207
613	R02-A-04	YOR020C	HSP10	essential	MT matrix	sequestered			1.023	1.012	0.98	0.9	0.83		0.994	0.982	0.952	0.837	0.76		-0.0145822	-0.00591349	0.000859048	-0.0149705		-0.0122552	0.0220787	-0.00216388	0.0204409
651	R02-B-08	YKL141W	SDH3	essential	MT matrix	sequestered			0.872	0.874	0.849	0.774	0.707		0.967	0.96	0.937	0.828	0.748		-0.0249726	-0.00212141	-0.00331855	-0.0259505		-0.0168631	0.0286307	0.00995332	0.0269836
566	R05-E-06	YML091C	RPM2	essential	MT-matrix	sequestered			0.918	0.899	0.906	0.786	0.691		1.001	0.983	0.931	0.817	0.699		-0.0030204	0.0348679	-0.0159936	-0.0747341		-0.00608831	-0.00236372	-0.0279734	-0.0655744
598	R02-F-10	YML025C	YML6	essential	MT-matrix	sequestered			0.914	0.978	0.91	0.836	0.76		0.976	0.963	0.927	0.821	0.741		-0.0944264	-0.0477025	-0.0410592	-0.0703225		-0.0107465	0.0143236	-0.00188129	0.014063
599	R05-B-01	YNL306W	MRPS18	essential	MT-matrix	sequestered			0.949	0.923	0.884	0.797	0.714		0.949	0.937	0.892	0.8	0.676		0.00388795	-0.0165081	-0.0288068	-0.070691		-0.0111261	0.00283223	-0.000387248	-0.0489821
606	R05-B-10	YGL068W	MNP1	essential	MT-matrix	sequestered			0.957	0.941	0.895	0.827	0.766		0.971	0.959	0.927	0.838	0.726		-0.00734628	-0.0238962	-0.0114316	-0.0215711		-0.0116781	0.0185519	0.0233866	-0.00260001
615	R01-F-11	YIL051C	MMF1	essential	MT-matrix	sequestered			0.915	0.86	0.874	0.814	0.688		0.957	0.946	0.919	0.818	0.709		0.0367492	0.0416267	0.0617447	-0.035714		-0.0123839	0.0233853	0.0123762	-0.0125348
620	R03-G-04	YLR163C	MAS1	essential	MT-matrix	sequestered			0.952	0.963	0.945	0.817	0.743		0.988	0.977	0.937	0.831	0.748		-0.0369842	0.00847317	-0.0480944	-0.0763309		-0.0131617	0.0106603	-0.00430421	0.00901317
631	R07-A-02	YNL137C	NAM9	essential	MT-matrix	sequestered			1.012	1.004	0.964	0.875	0.814		0.987	0.977	0.944	0.817	0.733		-0.0176026	-0.0152132	-0.021338	-0.0273704		-0.0141937	0.0184554	-0.0216309	-0.0118782
642	R01-B-02	YJR016C	ILV3	essential	MT-matrix	sequestered			0.965	0.935	0.923	0.801	0.727		0.954	0.946	0.924	0.829	0.716		0.00788034	0.0144291	-0.0370745	-0.06668		-0.0154799	0.0289532	0.0259901	-0.00278552
645	R06-H-07	YGL018C	JAC1	essential	MT-matrix	sequestered			0.977	0.992	0.956	0.883	0.801		0.959	0.951	0.917	0.81	0.727		-0.0420471	-0.0110428	0.00181795	-0.0313813		-0.0156053	0.0158727	-0.00281016	0.00724941
660	R05-B-05	YDR041W	RSM10	essential	MT-matrix	sequestered			0.971	0.946	0.91	0.826	0.755		0.97	0.964	0.922	0.831	0.719		0.00221101	-0.0124213	-0.018185	-0.0416726		-0.0179955	0.00769857	0.00943786	-0.0176347
690	R03-F-11	YHR024C	MAS2	essential	MT-matrix	sequestered			0.925	0.94	0.905	0.807	0.737		0.973	0.97	0.934	0.838	0.746		-0.0406894	-0.0114686	-0.035143	-0.0589301		-0.021242	0.0147191	0.0117587	0.0136272
692	R06-H-09	YDL120W	YFH1	essential	MT-matrix	sequestered			0.996	1.016	0.981	0.898	0.822		0.978	0.975	0.946	0.818	0.743		-0.0480558	-0.00919113	-0.00603249	-0.0299907		-0.0213675	0.0227967	-0.0182792	0.00416355
696	R03-C-10	YCL017C	NFS1	essential	MT-matrix	sequestered			0.983	1.012	0.972	0.883	0.796		0.991	0.988	0.951	0.847	0.772		-0.0576392	-0.0149735	-0.0202328	-0.0600633		-0.0216936	0.0146226	0.00386986	0.0308115
702	R05-C-02	YPL252C	YAH1	essential	MT-matrix	sequestered			0.571	0.602	0.577	0.521	0.492		0.876	0.877	0.843	0.765	0.665		-0.0490872	-0.0102724	-0.0173246	-0.0112067		-0.0230365	0.0116915	0.0197209	-0.000877467
735	R03-B-05	YDR232W	HEM1	essential	MT-matrix	sequestered			0.969	0.996	0.936	0.841	0.761		0.978	0.988	0.938	0.84	0.754		-0.0550686	-0.038103	-0.0547014	-0.0888419		-0.0351095	0.000145967	-0.0047935	0.00574181
739	R08-F-03	YKL192C	ACP1	essential	MT-matrix	sequestered			0.816	0.833	0.804	0.708	0.669		0.957	0.971	0.945	0.873	0.793		-0.0400485	-0.00788007	-0.0400004	-0.0311444		-0.038811	0.0259115	0.0540185	0.0780298
569	R02-G-11	YDR236C	FMN1	essential	MT?	sequestered	Bafunno-95		0.909	0.899	0.853	0.793	0.731		0.974	0.957	0.915	0.811	0.733		-0.0127082	-0.0251548	-0.00730875	-0.0216837		-0.00646795	0.00730305	-0.00791504	0.00926346
573	R02-G-03	YGR147C	NAT2	essential	MT?	sequestered			0.908	0.951	0.903	0.823	0.749		1.007	0.99	0.965	0.851	0.784		-0.0711165	-0.0258615	-0.0274198	-0.0551429		-0.00729594	0.0280986	0.00670619	0.0454104
749	R08-D-05	YNL256W	FOL1	essential	MT?	sequestered	Guldener-3811		0.901	0.957	0.915	0.827	0.764		0.916	0.947	0.91	0.821	0.75		-0.0852667	-0.0188867	-0.0290722	-0.0418642		-0.0557526	0.0123059	0.015032	0.0435112
8	R01-E-05	YKL165C	MCD4	essential	ER-cytoplasm	accessible	Gaynor-627		0.831	0.13	0.106	0.089	0.137		0.942	0.644	0.403	0.359	0.468		0.751181	-0.0232844	-0.0329078	0.038368		0.291375	-0.231986	-0.236454	-0.0289505		1
31	R08-F-06	YDR062W	LCB2	essential	ER-cytoplasm	accessible	Yasuda-4176		0.845	0.229	0.209	0.208	0.177		0.896	0.918	0.853	0.48	0.683		0.657099	-0.0157876	0.00558381	-0.0177327		-0.0457371	-0.020513	-0.376342	-0.0191482		1
45	R05-C-12	YPR113W	PIS1	essential	ER-cytoplasm	accessible	Kim-11142		0.974	0.377	0.282	0.269	0.355		0.946	0.775	0.75	0.678	0.558		0.632783	-0.0962902	-0.0819091	0.0551663		0.157025	0.0159504	0.01987	-0.0420801		1
52	R03-B-10	YDR434W	GPI17	essential	ER-cytoplasm	accessible	Ohishi-4088 Kim-11142		0.668	0.091	0.099	0.089	0.093		0.935	0.155	0.131	0.108	0.144		0.618722	0.011787	0.0100911	0.0230114		0.801065	-0.017968	-0.0301844	0.0367093		1
63	R06-B-03	YLR166C	SEC10	essential	ER-cytoplasm	accessible			0.888	0.336	0.219	0.201	0.274		0.996	0.525	0.399	0.322	0.378		0.585414	-0.122434	-0.121072	-0.00705681		0.472895	-0.110648	-0.156453	-0.0285059		1
68	R07-F-11	YKL154W	SRP102	essential	ER-cytoplasm	accessible	Ogg-341		0.666	0.13	0.098	0.085	0.124		0.925	0.602	0.485	0.411	0.498		0.57357	-0.0323444	-0.0378706	0.0211266		0.318229	-0.0962745	-0.1277	0.0572297		1
69	R05-G-05	YJL002C	OST1	essential	ER-cytoplasm	accessible	Yan-7121		0.837	0.298	0.242	0.208	0.235		0.99	0.622	0.562	0.501	0.421		0.572413	-0.05449	-0.0704912	-0.0168846		0.364167	-0.0316701	-0.0374558	-0.0711543		1
82	R01-E-12	YPL076W	GPI2	essential	ER-cytoplasm	accessible	Kim-11142		0.991	0.46	0.401	0.372	0.409		0.971	0.841	0.788	0.723	0.202		0.559572	-0.0530328	-0.045628	0.0352738		0.113058	-0.0115008	0.00579564	-0.607669		1
91	R03-D-03	YHR036W	BRL1	essential	ER-cytoplasm	accessible	Kim-11142		0.865	0.346	0.295	0.271	0.281		0.977	0.56	0.496	0.399	0.499		0.549631	-0.0473891	-0.0452491	-0.00879835		0.41629	-0.0396276	-0.0981543	0.10302		1
97	R02-B-06	YBR070C	ALG14	essential	ER-cytoplasm	accessible			0.604	0.099	0.088	0.09	0.109		0.888	0.4	0.236	0.183	0.264		0.54101	-0.0094908	0.00251148	0.0354113		0.493576	-0.160027	-0.196348	-0.055145		1
98	R01-G-06	YGR060W	ERG25	essential	ER-cytoplasm	accessible	Li-16927		0.778	0.27	0.26	0.178	0.234		0.968	0.673	0.601	0.401	0.476		0.539775	-0.00323394	-0.076841	0.0126602		0.287552	-0.0421515	-0.215129	-0.0484638		1
106	R03-H-01	YNL181W		essential	ER-cytoplasm	accessible			0.925	0.422	0.335	0.376	0.37		0.939	0.757	0.693	0.64	0.585		0.530424	-0.0858817	0.00123112	0.0254461		0.168829	-0.0284965	-0.00813221	0.0145518		1
132	R01-D-07	YJR013W	GPI14	essential	ER-cytoplasm	accessible	Kim-11142		0.95	0.472	0.464	0.436	0.409		0.964	0.868	0.839	0.751	0.621		0.502208	0.0050844	0.020546	0.0220434		0.0772925	0.0167509	0.0119079	-0.0526451		1
139	R04-F-08	YLL031C	GPI13	essential	ER-cytoplasm	accessible			0.799	0.334	0.201	0.199	0.263		0.954	0.674	0.6	0.571	0.512		0.491818	-0.140614	-0.121349	-0.0194406		0.272047	-0.0443221	-0.0057904	0.000618349		1
153	R07-F-10	YPL094C	SEC62	essential	ER-cytoplasm	accessible	Kim-11142		0.609	0.161	0.137	0.119	0.161		0.906	0.538	0.33	0.17	0.301		0.478035	-0.0223554	-0.0298656	0.0360196		0.366274	-0.201227	-0.358314	-0.14949		1
157	R07-F-04	YBR265W	TSC10	essential	ER-cytoplasm	accessible	Gupta-1630		0.924	0.477	0.426	0.314	0.27		0.963	0.742	0.681	0.526	0.372		0.468708	-0.0434634	-0.136331	-0.167819		0.209453	-0.0260033	-0.133365	-0.266249		1
172	R07-F-06	YDL015C	TSC13	essential	ER-cytoplasm	accessible	Kim-11142		0.77	0.349	0.271	0.133	0.204		0.917	0.64	0.549	0.366	0.274		0.444063	-0.0778767	-0.219773	-0.114228		0.269804	-0.0651742	-0.223562	-0.294917		1
178	R07-F-05	YML125C	PGA3	essential	ER-cytoplasm	accessible	Kim-11142		0.829	0.413	0.371	0.338	0.349		0.976	0.609	0.57	0.512	0.533		0.43701	-0.0351887	-0.0359925	0.00751742		0.363461	-0.00901934	-0.0100998	0.0985766		1
188	R01-E-11	YJL091C	GWT1	essential	ER-cytoplasm	accessible	Kim-11142		0.915	0.51	0.368	0.352	0.307		0.964	0.866	0.83	0.713	0.35		0.422637	-0.145532	-0.125569	-0.155131		0.0794066	0.00884277	-0.0330077	-0.427968		1
255	R06-E-08	YGL065C	ALG2	essential	ER-cytoplasm	accessible	Kämpf-11900		0.705	0.387	0.323	0.296	0.264		0.95	0.747	0.693	0.592	0.445		0.332199	-0.060883	-0.0594357	-0.0765487		0.190752	-0.0179257	-0.0569673	-0.169863		1
262	R01-E-10	YGL055W	OLE1	essential	ER-cytoplasm	accessible	Kim-11142		0.827	0.515	0.469	0.33	0.299		0.981	0.878	0.751	0.698	0.576		0.322399	-0.0366621	-0.158377	-0.171254		0.0842655	-0.0918155	-0.064257	-0.12589		1
287	R05-C-10	YMR200W	ROT1	essential	ER-cytoplasm	accessible	Martinez-Garay-239		0.896	0.607	0.453	0.377	0.446		0.955	0.874	0.823	0.744	0.638		0.295239	-0.156215	-0.201497	-0.0777273		0.0616621	-0.00740899	-0.00309798	-0.0353107		1
288	R07-F-08	YMR149W	SWP1	essential	ER-cytoplasm	accessible	Yan-7121		0.403	0.126	0.106	0.099	0.127		0.832	0.413	0.37	0.302	0.252		0.29488	-0.0188742	-0.0160907	0.0295155		0.422042	-0.0245483	-0.0628127	-0.0856001		1
297	R06-A-01	YHR101C	BIG1	essential	ER-cytoplasm	accessible			1.009	0.733	0.661	0.607	0.548		0.994	0.899	0.865	0.767	0.663		0.277955	-0.0595744	-0.055057	-0.0813683		0.0754827	0.0129345	-0.0010597	-0.0269188		1
309	R01-G-03	YOR254C	SEC63	essential	ER-cytoplasm	accessible	Kim-11142		0.412	0.158	0.116	0.137	0.093		0.914	0.431	0.451	0.331	0.302		0.269287	-0.0428303	-0.00422548	-0.0508585		0.487638	0.0466246	-0.0459491	-0.0349897		1
314	R07-G-01	YDL212W	SHR3	essential	ER-cytoplasm	accessible	Kim-11142		0.472	0.219	0.188	0.173	0.167		0.932	0.282	0.261	0.228	0.215		0.266618	-0.0285448	-0.0268151	-0.0199699		0.663719	-0.00745137	-0.015919	0.00134565		1
327	R01-G-05	YGR175C	ERG1	essential	ER-cytoplasm	accessible	Kim-11142		0.899	0.649	0.727	0.628	0.498		0.978	0.879	0.856	0.779	0.672		0.252161	0.107784	0.0636106	-0.0550683		0.0801125	0.0240539	0.0349334	0.00675767		1
398	R06-C-06	YGR074W	SMD1	essential	ER-cytoplasm	accessible	Gao-559		0.866	0.7	0.627	0.558	0.614		0.969	0.945	0.902	0.795	0.734		0.16041	-0.0616958	-0.0794674	0.0425485		0.00105708	0.00551143	-0.015032	0.0233412		1
399	R01-F-02	YJL097W	PHS1	essential	ER-cytoplasm	accessible	Kim-11142		0.887	0.721	0.616	0.549	0.463		0.945	0.855	0.819	0.751	0.622		0.159862	-0.0973066	-0.113787	-0.18087		0.0714267	0.00822123	0.0256499	-0.0375102		1
425	R06-C-04	YJR067C	YAE1	essential	ER-cytoplasm	accessible	Kawagoe-566		0.918	0.77	0.717	0.686	0.662		0.952	0.939	0.905	0.814	0.735		0.139207	-0.0369481	0.00216403	0.0290315		-0.0101443	0.0151947	0.0148253	0.0310765		1
426	R08-H-06	YDR331W	GPI8	essential	ER-cytoplasm	accessible	Ohishi-4088		0.245	0.114	0.093	0.095	0.122		0.843	0.644	0.577	0.502	0.456		0.138035	-0.0203663	-0.00782308	0.0361146		0.189208	-0.0382221	-0.059474	-0.0456636		1
456	R05-G-06	YHR190W	ERG9	essential	ER-cytoplasm	accessible	Jennings-6038		0.823	0.711	0.657	0.553	0.514		1.007	0.958	0.926	0.856	0.756		0.101996	-0.0398486	-0.0977988	-0.102205		0.0265307	0.0184954	0.046721	0.0402398		1
458	R07-C-03	YHR042W	NCP1	essential	ER-cytoplasm	accessible	octopus		0.912	0.799	0.759	0.672	0.586		0.959	0.94	0.877	0.745	0.656		0.100775	-0.0213565	-0.0471792	-0.103738		-0.00397742	-0.0170428	-0.0716278	-0.0800085		1
459	R05-B-07	YNL158W	PGA1	essential	ER-cytoplasm	accessible	Kim-11142		0.972	0.859	0.805	0.767	0.665		0.966	0.921	0.879	0.798	0.662		0.099208	-0.0354135	0.00453462	-0.0651154		0.0233311	0.00526893	0.0140508	-0.0515674		1
470	R05-D-02	YIR022W	SEC11	essential	ER-cytoplasm	accessible	octopus		0.687	0.59	0.592	0.58	0.531		0.961	0.894	0.865	0.806	0.68		0.0890087	0.0199455	0.0691068	0.0537479		0.0467124	0.01822	0.052493	0.0020435		1
480	R07-E-12	YEL002C	WBP1	essential	ER-cytoplasm	accessible	Yan-7121		0.948	0.852	0.792	0.742	0.619		0.956	0.891	0.846	0.742	0.627		0.0810916	-0.0424183	-0.018765	-0.118406		0.0447236	0.000233076	-0.0235436	-0.0686014		1
509	R02-A-01	YDR437W	GPI19	essential	ER-cytoplasm	accessible	Newman-1801		1.037	0.986	0.948	0.879	0.801		1.005	0.956	0.916	0.807	0.715		0.0291537	-0.0134876	0.00347039	-0.0247661		0.0265809	0.00947372	-0.0118084	-0.0147491
511	R01-F-01	YBL040C	ERD2	essential	ER-cytoplasm	accessible	Brach-534		0.77	0.707	0.62	0.601	0.551		0.96	0.915	0.883	0.804	0.676		0.0493554	-0.0773411	-0.0338353	-0.0487236		0.0234816	0.0160658	0.0278191	-0.0257263
572	R01-D-11	YDR302W	GPI11	essential	ER-cytoplasm	accessible	Kim-11142		0.911	0.84	0.838	0.735	0.606		0.951	0.935	0.905	0.803	0.695		0.0544942	0.0229073	-0.0142194	-0.122417		-0.00694794	0.019423	0.00543979	-0.0204055
579	R01-G-04	YHR007C	ERG11	essential	ER-cytoplasm	accessible	Kim-11142		0.915	0.858	0.937	0.846	0.699		1.007	0.991	0.953	0.847	0.742		0.0389543	0.115179	0.103652	-0.01892		-0.00835302	0.0136785	0.000698616	-0.0141425
600	R06-C-11	YHR188C	GPI16	essential	ER-cytoplasm	accessible	Ohishi-4088		0.938	0.939	0.91	0.847	0.769		0.955	0.943	0.908	0.769	0.717		-0.0255933	-0.00470357	0.0155873	-0.0153872		-0.0112766	0.0143071	-0.0450961	0.00177849
650	R06-C-08	YJL104W	PAM16	essential	ER-cytoplasm	accessible	Azuma-783		0.883	0.893	0.876	0.817	0.746		0.955	0.948	0.913	0.797	0.722		-0.0340801	0.00750798	0.0290831	0.00482542		-0.016562	0.0145896	-0.015728	0.00345687
661	R07-F-01	YCL052C	PBN1	essential	ER-cytoplasm	accessible	Naik-1277		0.812	0.803	0.791	0.719	0.645		0.972	0.966	0.933	0.824	0.731		-0.0112781	0.0104735	0.00672328	-0.0298986		-0.0180457	0.0178339	-0.00133967	-0.0030358
699	R05-G-04	YLR378C	SEC61	essential	ER-cytoplasm	accessible	Kim-11142		0.968	0.986	0.95	0.85	0.761		0.967	0.965	0.929	0.828	0.721		-0.0451197	-0.0112226	-0.0325098	-0.0778165		-0.0221486	0.0144366	0.00466791	-0.0159063
717	R05-G-02	YMR296C	LCB1	essential	ER-cytoplasm	accessible	Yasuda-4176		0.427	0.475	0.461	0.415	0.374		0.897	0.9	0.877	0.803	0.71		-0.0640705	-0.00162072	-0.00881618	-0.0276833		-0.0256776	0.0252405	0.0424377	0.0374837
252	R07-E-10	YDR367W	KEI1	essential	GC-cytoplasm	accessible	Sato-4444		0.944	0.618	0.56	0.477	0.284		0.952	0.865	0.804	0.673	0.351		0.334779	-0.0471656	-0.0895557	-0.304709		0.0680798	-0.0190534	-0.0814555	-0.425518		1
396	R05-C-09	YGL225W	VRG4	essential	GC-cytoplasm	accessible	Kim-11142		0.457	0.299	0.204	0.176	0.228		0.924	0.849	0.715	0.639	0.497		0.162269	-0.0986276	-0.111296	-0.0272709		0.0560974	-0.101249	-0.106621	-0.205262		1
420	R06-C-07	YJR022W	LSM8	essential	GC-cytoplasm	accessible	Kim-11142		0.388	0.246	0.229	0.22	0.235		0.916	0.771	0.737	0.66	0.641		0.14643	-0.0118807	0.00172904	0.0404473		0.130294	0.00570212	0.00182111	0.0777471		1
278	R01-E-06	YOL130W	ALR1	essential	PM-cytoplasm	accessible	Kim-11142		0.427	0.143	0.145	0.122	0.155		1.09	0.789	0.563	0.668	0.673		0.301971	0.00655029	-0.00629786	0.0479077		0.290833	-0.207089	-0.00730538	0.103288		1
302	R01-G-01	YGL008C	PMA1	essential	PM-cytoplasm	accessible	Kim-11142		1.005	0.733	0.756	0.677	0.602		0.982	0.893	0.87	0.79	0.697		0.27365	0.0480134	0.0317916	-0.00975028		0.0694413	0.024845	0.0337481	0.0267775		1
417	R02-B-02	YGR191W	HIP1	essential	PM-cytoplasm	accessible	Kim-11142		0.298	0.156	0.136	0.123	0.16		0.827	0.451	0.264	0.182	0.314		0.148779	-0.0179752	-0.0193901	0.040206		0.376713	-0.182758	-0.251497	-0.0394183		1
570	R01-E-09	YGR065C	VHT1	essential	PM-cytoplasm	accessible	Kim-11142		0.944	0.878	0.858	0.793	0.671		0.987	0.97	0.945	0.848	0.737		0.0481199	0.00366097	0.0158445	-0.078106		-0.00679413	0.0269686	0.024135	0.00109242
679	R09-A-03	YIL147C	SLN1	essential	PM-cytoplasm	accessible	Ota-566		0.994	0.995	0.893	0.853	0.803		0.966	0.962	0.909	0.842	0.711		-0.0270554	-0.0856981	-0.0387105	-0.0320364		-0.0200093	-0.00466388	0.0251659	-0.0266626
233	R02-F-05	YLR105C	SEN2	essential	MT-cytoplasm	accessible			0.562	0.224	0.211	0.175	0.202		0.954	0.695	0.507	0.374	0.534		0.357984	-0.00800993	-0.0298464	0.0209365		0.249848	-0.170084	-0.271801	0.00906029		1
315	R03-D-05	YPL083C	SEN54	essential	MT-cytoplasm	accessible			0.921	0.659	0.542	0.492	0.522		0.989	0.929	0.892	0.849	0.779		0.264817	-0.112755	-0.116149	-0.0342634		0.0386102	0.0112889	0.068713	0.102929		1
381	R07-C-07	YHR083W	SAM35	essential	MT-cytoplasm	accessible			0.92	0.734	0.702	0.645	0.638		0.954	0.907	0.884	0.785	0.718		0.181051	-0.0142443	-0.00901316	0.0368925		0.0257463	0.025636	0.0127609	0.0412262		1
522	R07-G-04	YGR082W	TOM20	essential	MT-cytoplasm	accessible	Perry-265		0.914	0.883	0.842	0.766	0.732		0.96	0.93	0.895	0.786	0.706		0.0103145	-0.0199718	-0.0231669	-0.00271686		0.00762539	0.0135726	-0.0103144	0.000200227
720	R07-G-05	YNL131W	TOM22	essential	MT-cytoplasm	accessible			0.936	0.961	0.926	0.842	0.783		0.981	0.983	0.946	0.819	0.734		-0.052002	-0.0108393	-0.0148719	-0.0210754		-0.0267281	0.0143401	-0.0254982	-0.0168279
1	R05-E-08	YOL078W	AVO1	essential					0.983	0.145	0.141	0.146	0.152		0.974	0.312	0.311	0.245	0.202		0.898259	-0.000184796	0.0212737	0.0417238		0.67535	0.0165154	-0.0265919	-0.0484727		1
2	R06-A-05	YPL175W	SPT14	essential					0.951	0.177	0.135	0.127	0.162		0.964	0.793	0.704	0.528	0.504		0.828533	-0.042261	-0.0375806	0.0197053		0.156574	-0.054302	-0.184801	-0.136317		1
3	R01-A-01	YOR335C	ALA1	essential					0.94	0.182	0.16	0.14	0.17		1	0.323	0.242	0.204	0.23		0.811179	-0.0194611	-0.0269643	0.0248027		0.690554	-0.0719499	-0.0889624	-0.0211034		1
4	R05-H-04	YLR440C	SEC39	essential					0.859	0.104	0.12	0.104	0.117		0.973	0.211	0.161	0.139	0.201		0.809986	0.0212366	0.0143685	0.0405087		0.781084	-0.0437571	-0.0510147	0.0568999		1
5	R08-G-05	YBR080C	SEC18	essential					0.852	0.113	0.058	0.054	0.068		0.934	0.155	0.094	0.092	0.11		0.792529	-0.0589014	-0.057589	-0.0344009		0.800033	-0.0591707	-0.0499864	-0.0106444		1
6	R02-D-11	YHR197W	RIX1	essential					0.896	0.185	0.192	0.181	0.234		0.977	0.649	0.502	0.423	0.614		0.760509	0.0134714	0.0205966	0.106376		0.322209	-0.127026	-0.162532	0.169107		1
7	R01-B-12	YCR012W	PGK1	essential					0.908	0.197	0.16	0.132	0.153		0.933	0.505	0.499	0.449	0.327		0.760195	-0.0359991	-0.0534278	-0.0142818		0.429022	0.0218526	0.0218664	-0.0783949		1
9	R01-G-12	YMR229C	RRP5	essential					0.979	0.294	0.267	0.213	0.253		0.956	0.737	0.614	0.478	0.593		0.729676	-0.0217673	-0.0598775	0.0113982		0.207514	-0.0953281	-0.187486	0.0468355		1
10	R01-H-02	YOR116C	RPO31	essential					0.967	0.286	0.256	0.203	0.369		0.956	0.738	0.557	0.417	0.657		0.725579	-0.0254045	-0.0634642	0.174065		0.206457	-0.15986	-0.264038	0.134915		1
11	R08-E-03	YGR198W	YPP1	essential					0.917	0.238	0.209	0.354	0.269		0.957	0.593	0.737	0.763	0.638		0.724679	-0.0257104	0.176802	0.0943604		0.360766	0.193863	0.317457	0.261729		1
12	R02-D-03	YLR222C	UTP13	essential					0.874	0.196	0.183	0.177	0.225		0.991	0.744	0.526	0.441	0.646		0.7247	-0.00884901	0.00350595	0.0823115		0.236234	-0.200723	-0.240677	0.113252		1
13	R08-D-10	YKR079C	TRZ1	essential					0.877	0.208	0.145	0.127	0.198		0.943	0.881	0.795	0.725	0.751		0.714698	-0.0651145	-0.0717592	0.033272		0.0418786	-0.045989	-0.0340124	0.114671		1
14	R02-D-08	YGL120C	PRP43	essential					0.878	0.218	0.197	0.166	0.243		0.985	0.527	0.422	0.329	0.448		0.704749	-0.0172498	-0.0343975	0.0819284		0.459429	-0.0871493	-0.149904	0.066873		1
15	R02-D-12	YNL258C	DSL1	essential					0.897	0.24	0.255	0.228	0.232		0.974	0.815	0.801	0.723	0.657		0.700946	0.0241796	0.0182698	0.0430837		0.143638	0.03046	0.0332798	0.0535196		1
16	R07-H-04	YGR090W	UTP22	essential					0.99	0.337	0.272	0.203	0.273		0.977	0.784	0.656	0.52	0.636		0.694107	-0.0635138	-0.119694	-0.00948561		0.179503	-0.0982404	-0.185188	0.0570412		1
17	R02-C-11	YCR057C	PWP2	essential					0.807	0.16	0.171	0.165	0.194		0.986	0.59	0.453	0.382	0.538		0.69227	0.0172523	0.0283089	0.0808887		0.393865	-0.119224	-0.150906	0.125625		1
18	R03-B-01	YEL058W	PCM1	essential					1.011	0.361	0.492	0.544	0.379		0.984	0.945	0.926	0.874	0.801		0.690252	0.159176	0.276923	0.104637		0.016537	0.0322375	0.0827403	0.116656		1
19	R04-F-09	YKL173W	SNU114	essential					0.879	0.232	0.173	0.17	0.208		1.01	0.677	0.616	0.538	0.519		0.69039	-0.0598653	-0.0448702	0.0200738		0.326667	-0.029676	-0.0498032	0.00719641		1
20	R08-D-07	YPR105C	COG4	essential					0.719	0.077	0.09	0.083	0.101		0.919	0.265	0.242	0.22	0.245		0.689055	0.01703	0.0180824	0.049057		0.668274	-0.0106391	-0.00784962	0.0610988		1	5
21	R02-G-12	YOR319W	HSH49	essential					0.945	0.301	0.257	0.214	0.308		0.974	0.566	0.422	0.351	0.506		0.68536	-0.0408101	-0.0663546	0.0766248		0.406851	-0.128375	-0.163903	0.106427		1
22	R05-D-04	YHR165C	PRP8	essential					0.918	0.275	0.217	0.18	0.232		0.976	0.763	0.619	0.52	0.603		0.684962	-0.0574442	-0.0798723	0.00449495		0.20067	-0.117244	-0.16299	0.033279		1
23	R03-C-07	YKL035W	UGP1	essential					0.797	0.161	0.13	0.115	0.122		0.918	0.372	0.281	0.245	0.253		0.680403	-0.0302829	-0.0348284	-0.0157046		0.554134	-0.0803171	-0.0900169	-0.040867		1
24	R07-C-02	YGL145W	TIP20	essential					0.731	0.102	0.086	0.084	0.089		0.963	0.318	0.25	0.206	0.265		0.674409	-0.0150634	-0.00824029	0.00557848		0.657656	-0.0577558	-0.0812017	0.0329286		1
25	R07-G-07	YER172C	BRR2	essential					0.877	0.247	0.161	0.124	0.215		0.96	0.368	0.324	0.247	0.357		0.671699	-0.0899934	-0.11848	0.0128195		0.601706	-0.0282046	-0.0833133	0.108208		1
26	R02-D-01	YPL126W	NAN1	essential					0.959	0.333	0.26	0.232	0.337		0.981	0.779	0.681	0.546	0.635		0.665148	-0.0726937	-0.0793032	0.0798052		0.188917	-0.0651153	-0.147725	0.0609339		1
27	R08-E-10	YDR172W	SUP35	essential					0.786	0.167	0.125	0.102	0.156		0.944	0.881	0.838	0.723	0.554		0.661948	-0.0425606	-0.0575726	0.0227731		0.0429106	0.00189521	-0.0364877	-0.159702		1
28	R01-C-06	YPR035W	GLN1	essential					0.758	0.14	0.132	0.095	0.116		0.962	0.523	0.422	0.295	0.28		0.661576	-0.00486464	-0.036489	-0.000508863		0.439922	-0.0829209	-0.187755	-0.162882		1
29	R07-C-05	YHR085W	IPI1	essential					0.908	0.288	0.21	0.2	0.222		0.969	0.738	0.546	0.424	0.625		0.659865	-0.0797047	-0.0693914	-0.0231006		0.219873	-0.172109	-0.255374	0.0903467		1
30	R01-H-10	YDR060W	MAK21	essential					0.879	0.261	0.242	0.191	0.267		0.985	0.765	0.673	0.502	0.606		0.658417	-0.0136962	-0.0507891	0.0663496		0.207844	-0.0592249	-0.187381	0.0353431		1
32	R06-B-01	YHR072W	ERG7	essential					0.991	0.377	0.411	0.35	0.333		0.968	0.735	0.691	0.569	0.484		0.651082	0.0498027	0.0185872	0.0259886		0.222012	-0.00746785	-0.0727477	-0.102861		1
33	R02-D-07	YJL033W	HCA4	essential					0.86	0.249	0.188	0.165	0.241		1.003	0.769	0.586	0.459	0.637		0.651195	-0.0616209	-0.0698168	0.0450972		0.222191	-0.160335	-0.244827	0.0742902		1
34	R01-E-03	YJL005W	CYR1	essential					0.981	0.37	0.36	0.295	0.304		1.052	0.984	0.955	0.833	0.741		0.648036	-0.000237239	-0.0419333	-0.00475523		0.0454862	0.0233053	-0.00922854	-0.00813571		1
35	R03-B-09	YDR299W	BFR2	essential					0.955	0.346	0.25	0.176	0.303		0.973	0.809	0.71	0.481	0.664		0.64651	-0.0983517	-0.163115	0.0203794		0.148948	-0.0645338	-0.259883	0.0696114		1
36	R06-E-01	YDR235W	PRP42	essential					0.923	0.316	0.241	0.209	0.278		0.98	0.735	0.636	0.526	0.628		0.64514	-0.0754681	-0.0890961	0.0202989		0.234396	-0.0687151	-0.125966	0.0976962		1
37	R03-B-11	YDL030W	PRP9	essential					0.92	0.314	0.231	0.168	0.242		0.973	0.404	0.302	0.241	0.335		0.644116	-0.0845881	-0.13776	-0.0252413		0.577067	-0.0907584	-0.128794	0.0395125		1
38	R03-D-11	YMR268C	PRP24	essential					0.849	0.247	0.173	0.14	0.211		0.982	0.334	0.248	0.193	0.332		0.64156	-0.0764034	-0.0986291	0.0075145		0.66035	-0.0768963	-0.114204	0.10933		1
39	R03-A-07	YJL069C	UTP18	essential					0.998	0.393	0.315	0.268	0.327		0.977	0.832	0.797	0.726	0.684		0.640977	-0.0765582	-0.10079	0.000390421		0.128763	0.00803524	0.0190223	0.0731536		1
40	R02-B-12	YGR098C	ESP1	essential					0.959	0.355	0.303	0.256	0.37		0.97	0.502	0.387	0.328	0.482		0.640893	-0.0482519	-0.0737824	0.099316		0.470377	-0.0996977	-0.124715	0.140654		1
41	R04-A-03	YIL091C	UTP25	essential					0.884	0.284	0.208	0.17	0.253		1.004	0.784	0.69	0.561	0.636		0.638441	-0.0775596	-0.102202	0.0224236		0.207367	-0.0603785	-0.134446	0.0570412		1
42	R05-H-09	YLR117C	CLF1	essential					0.951	0.35	0.26	0.207	0.298		0.974	0.708	0.554	0.463	0.555		0.637794	-0.0914368	-0.129064	0.00933792		0.256746	-0.131488	-0.175395	0.0245661		1
43	R02-A-09	YIL115C	NUP159	essential					0.994	0.396	0.329	0.253	0.345		0.989	0.825	0.768	0.638	0.611		0.633364	-0.0640108	-0.122708	0.0209555		0.148547	-0.0168592	-0.0824891	-0.0211181		1
44	R02-E-02	YGR128C	UTP8	essential					0.875	0.28	0.213	0.176	0.281		1	0.776	0.608	0.452	0.644		0.633163	-0.0674869	-0.0903478	0.063969		0.211696	-0.143236	-0.26089	0.07664		1
46	R01-B-01	YDR398W	UTP5	essential					0.988	0.393	0.318	0.253	0.36		0.965	0.801	0.738	0.659	0.63		0.630213	-0.0731607	-0.119401	0.044157		0.149149	-0.0248968	-0.031129	0.0307143		1
47	R08-F-04	YNL287W	SEC21	essential					0.714	0.126	0.094	0.053	0.1		0.885	0.168	0.122	0.078	0.132		0.629649	-0.0324642	-0.0731627	-0.00629352		0.735723	-0.0417324	-0.0810552	0.00625416		1
48	R06-A-03	YBR110W	ALG1	essential					0.871	0.281	0.21	0.207	0.215		0.979	0.638	0.575	0.497	0.355		0.627755	-0.071987	-0.0529887	-0.0246667		0.335901	-0.0341068	-0.0593196	-0.17999		1
49	R01-F-06	YER023W	PRO3	essential					0.702	0.116	0.119	0.107	0.141		0.968	0.273	0.203	0.2	0.254		0.627757	0.00687368	0.00486019	0.0591085		0.710384	-0.0625256	-0.0410588	0.0651769		1
50	R08-C-09	YGR274C	TAF1	essential					0.727	0.144	0.11	0.091	0.127		0.923	0.384	0.363	0.347	0.31		0.623797	-0.0341898	-0.0458619	0.00966985		0.546609	-0.00168804	0.0235358	0.0258352		1
51	R01-G-10	YJL109C	UTP10	essential					0.857	0.273	0.227	0.169	0.201		0.972	0.76	0.668	0.454	0.597		0.621505	-0.0439141	-0.0913149	-0.034414		0.199713	-0.0595074	-0.241501	0.0280937		1
53	R06-B-07	YDL058W	USO1	essential					0.84	0.264	0.229	0.244	0.285		0.968	0.53	0.467	0.463	0.517		0.613129	-0.0317263	0.0116601	0.0869146		0.438714	-0.0402092	0.0127661	0.159802		1
54	R05-D-09	YNL172W	APC1	essential					0.943	0.366	0.295	0.264	0.339		0.965	0.543	0.424	0.38	0.486		0.611542	-0.0694398	-0.0759847	0.046074		0.421876	-0.101835	-0.103699	0.102884		1
55	R04-C-08	YMR093W	UTP15	essential					0.834	0.261	0.176	0.157	0.24		0.976	0.749	0.574	0.441	0.614		0.609978	-0.0884414	-0.0929728	0.0305405		0.215469	-0.152557	-0.245963	0.0633984		1
56	R08-E-06	YPL160W	CDC60	essential					0.722	0.152	0.116	0.105	0.127		0.943	0.315	0.242	0.194	0.246		0.609594	-0.0362151	-0.0373125	0.000849567		0.640187	-0.0634932	-0.092882	0.00963741		1
57	R03-D-12	YKL059C	MPE1	essential					0.843	0.272	0.195	0.151	0.226		0.967	0.407	0.289	0.199	0.342		0.607538	-0.0790517	-0.112545	-0.000154998		0.567703	-0.108406	-0.183945	0.0460906		1
58	R07-D-02	YDR460W	TFB3	essential					0.759	0.19	0.122	0.085	0.155		0.944	0.503	0.33	0.212	0.348		0.607526	-0.0713165	-0.104023	-0.00391152		0.442488	-0.164229	-0.269336	-0.0470328		1
59	R08-C-01	YPL011C	TAF3	essential					0.804	0.237	0.181	0.165	0.216		0.943	0.565	0.495	0.454	0.427		0.604146	-0.056318	-0.0565864	0.0251712		0.375917	-0.0460266	-0.0353704	-0.00254406		1
60	R01-A-11	YNR053C	NOG2	essential					0.903	0.334	0.286	0.232	0.298		0.961	0.828	0.782	0.66	0.677		0.603766	-0.0443512	-0.0804058	0.0269785		0.11648	-0.00444022	-0.0584326	0.0676327		1
61	R06-D-11	YPR144C	NOC4	essential					0.835	0.268	0.205	0.173	0.246		0.95	0.76	0.586	0.375	0.622		0.603336	-0.0633165	-0.0808394	0.0307803		0.177009	-0.150821	-0.339274	0.0629126		1
62	R03-A-08	YHR196W	UTP9	essential					0.955	0.391	0.276	0.221	0.325		0.967	0.79	0.729	0.558	0.646		0.596896	-0.118521	-0.156898	-5.70277e-05		0.162841	-0.0232911	-0.144501	0.0646263		1
64	R04-A-08	YIL144W	NDC80	essential					0.83	0.28	0.262	0.242	0.276		0.994	0.835	0.817	0.765	0.665		0.584724	-0.0119943	-0.00846189	0.0573377		0.143136	0.0271357	0.0641183	0.04352		1
65	R03-A-04	YPL243W	SRP68	essential					0.93	0.381	0.309	0.264	0.311		0.99	0.817	0.655	0.528	0.692		0.58101	-0.0701228	-0.0925227	-0.00759931		0.158035	-0.134238	-0.210171	0.100152		1
66	R07-H-03	YMR128W	ECM16	essential					1.026	0.475	0.347	0.248	0.388		0.994	0.842	0.767	0.663	0.666		0.580709	-0.130726	-0.216012	-0.00911566		0.135736	-0.0359432	-0.0695189	0.0375132		1
67	R08-B-02	YDR021W	FAL1	essential					0.897	0.35	0.249	0.198	0.322		0.914	0.82	0.77	0.679	0.68		0.579667	-0.103894	-0.14023	0.0411682		0.0764328	-0.00934659	-0.0264611	0.0802676		1
70	R02-F-04	YAR007C	RFA1	essential					0.87	0.334	0.256	0.175	0.293		0.987	0.713	0.536	0.348	0.571		0.568244	-0.0783262	-0.151125	0.0203472		0.264876	-0.156818	-0.323007	0.0415648		1
71	R02-D-06	YDR324C	UTP4	essential					0.716	0.184	0.159	0.147	0.185		0.984	0.569	0.405	0.324	0.504		0.567855	-0.0227986	-0.0204845	0.0424915		0.414	-0.150478	-0.20049	0.10047		1
72	R03-H-08	YLR215C	CDC123	essential					0.976	0.439	0.353	0.333	0.374		1.017	0.856	0.812	0.763	0.739		0.566579	-0.0842397	-0.0708619	0.012008		0.144673	-0.000630953	0.0394444	0.124385		1
73	R05-G-11	YER171W	RAD3	essential					0.652	0.123	0.086	0.066	0.112		0.909	0.429	0.278	0.186	0.302		0.566218	-0.0382167	-0.0537261	0.0129292		0.484592	-0.143912	-0.22329	-0.0328756		1
74	R02-E-12	YOR181W	LAS17	essential					0.847	0.315	0.286	0.245	0.266		0.972	0.861	0.831	0.722	0.757		0.564434	-0.023403	-0.0433286	0.00548636		0.092948	0.0152418	-0.0165836	0.14417		1
75	R02-C-06	YDR052C	DBF4	essential					0.805	0.275	0.254	0.243	0.214		0.968	0.49	0.46	0.434	0.409		0.563326	-0.0155416	-0.00170852	-0.0193777		0.480998	-0.00572096	0.0191583	0.0516675		1
76	R02-H-09	YDL098C	SNU23	essential					0.812	0.282	0.215	0.225	0.321		0.911	0.529	0.329	0.358	0.508		0.563143	-0.067427	-0.0317588	0.114814		0.380948	-0.192827	-0.116127	0.148324		1
77	R02-C-07	YNL039W	BDP1	essential					0.921	0.39	0.317	0.259	0.287		0.986	0.826	0.76	0.683	0.664		0.5614	-0.0709856	-0.108649	-0.0493524		0.144394	-0.0268249	-0.0278531	0.051641		1
78	R02-E-08	YGR083C	GCD2	essential					0.788	0.26	0.236	0.187	0.227		0.973	0.812	0.609	0.436	0.651		0.561565	-0.0193886	-0.0546494	0.0144017		0.145777	-0.180177	-0.318747	0.0483343		1
79	R07-E-01	YDR361C	BCP1	essential					0.913	0.383	0.313	0.266	0.301		0.98	0.861	0.828	0.739	0.721		0.560506	-0.0677978	-0.0922464	-0.023067		0.101204	0.011901	0.00445597	0.0940303		1
80	R05-H-11	YLR103C	CDC45	essential					0.826	0.298	0.226	0.176	0.264		0.916	0.609	0.562	0.459	0.46		0.560572	-0.07261	-0.110193	0.0215769		0.301541	-0.017928	-0.0756939	-0.00309469		1
81	R03-A-10	YKR002W	PAP1	essential					0.695	0.17	0.138	0.119	0.139		0.945	0.416	0.312	0.241	0.335		0.560685	-0.0311457	-0.0397884	-0.00308096		0.535486	-0.0923075	-0.141479	0.0268275		1
83	R03-G-11	YNL207W	RIO2	essential					0.86	0.332	0.247	0.184	0.269		0.96	0.807	0.756	0.622	0.65		0.559685	-0.0863137	-0.137754	-0.00927797		0.137647	-0.0111947	-0.0832636	0.0522269		1
84	R03-F-05	YML126C	ERG13	essential					0.796	0.271	0.234	0.2	0.177		0.932	0.774	0.743	0.709	0.659		0.558048	-0.0337815	-0.0506483	-0.0640392		0.143634	0.00921239	0.0592934	0.0996455		1
85	R06-C-05	YIR015W	RPR2	essential					0.899	0.372	0.29	0.247	0.31		0.97	0.775	0.724	0.638	0.648		0.557564	-0.0817175	-0.103692	0.000997254		0.181793	-0.0130028	-0.0296349	0.0832681		1
86	R05-E-04	YDR301W	CFT1	essential					0.754	0.234	0.168	0.12	0.185		0.981	0.449	0.247	0.18	0.301		0.553632	-0.0677329	-0.10911	-0.0126353		0.537754	-0.199574	-0.251858	-0.05541		1
87	R06-C-09	YNR038W	DBP6	essential					0.905	0.383	0.305	0.252	0.336		0.95	0.824	0.794	0.629	0.687		0.551895	-0.0768579	-0.109616	0.0233521		0.109356	0.0131511	-0.0925706	0.0857886		1
88	R07-G-02	YDR373W	FRQ1	essential					0.9	0.379	0.314	0.294	0.454		0.976	0.683	0.635	0.573	0.583		0.550923	-0.0622552	-0.0530968	0.184261		0.285237	-0.0148604	-0.0128289	0.0899904		1
89	R02-F-06	YPL209C	IPL1	essential					0.823	0.304	0.279	0.216	0.307		1.009	0.576	0.425	0.304	0.456		0.550728	-0.0192026	-0.0671808	0.0719909		0.4324	-0.135606	-0.232642	0.026218		1
90	R08-D-02	YLR336C	SGD1	essential					0.896	0.376	0.267	0.201	0.337		0.918	0.828	0.77	0.647	0.694		0.549924	-0.112175	-0.165174	0.0323961		0.0721042	-0.0178032	-0.0745217	0.0913095		1
92	R03-F-12	YKL028W	TFA1	essential					0.85	0.332	0.238	0.147	0.239		0.943	0.717	0.618	0.431	0.545		0.54892	-0.0965062	-0.18366	-0.0490658		0.21524	-0.0697321	-0.224512	0.00112481		1
93	R03-B-03	YER082C	UTP7	essential					0.882	0.364	0.246	0.205	0.286		0.97	0.811	0.759	0.616	0.662		0.548085	-0.122727	-0.146981	-0.0220127		0.143738	-0.0120823	-0.0949176	0.0647117		1
94	R02-D-04	YOR168W	GLN4	essential					0.784	0.269	0.232	0.205	0.23		0.985	0.931	0.896	0.829	0.743		0.547336	-0.0338415	-0.0422397	0.00845765		0.0323681	0.0136291	0.0418463	0.0506752		1
95	R07-E-08	YDL087C	LUC7	essential					0.804	0.289	0.204	0.172	0.295		0.96	0.637	0.513	0.432	0.61		0.546814	-0.0876023	-0.105233	0.0726138		0.317351	-0.102092	-0.138708	0.176221		1
96	R05-B-08	YDL166C	FAP7	essential					0.836	0.322	0.245	0.207	0.27		0.971	0.82	0.753	0.624	0.644		0.544876	-0.0775533	-0.0981927	0.00307365		0.135256	-0.0282775	-0.0945304	0.0301283		1
99	R01-H-07	YPR010C	RPA135	essential					0.978	0.466	0.407	0.3	0.385		0.962	0.842	0.781	0.697	0.654		0.538963	-0.052853	-0.141573	-0.00317162		0.102713	-0.020353	-0.0274397	0.0208001		1
100	R03-E-02	YMR240C	CUS1	essential					0.94	0.431	0.307	0.241	0.368		1.004	0.76	0.586	0.514	0.635		0.536648	-0.127515	-0.176185	0.0128707		0.232737	-0.150821	-0.167244	0.0810185		1
101	R04-B-06	YPL146C	NOP53	essential					0.868	0.36	0.315	0.284	0.305		0.97	0.557	0.434	0.436	0.46		0.537425	-0.0401745	-0.0445556	0.00759638		0.412237	-0.105499	-0.049191	0.0518736		1
102	R02-E-04	YOR206W	NOC2	essential					0.767	0.264	0.198	0.179	0.243		0.968	0.785	0.532	0.404	0.646		0.534549	-0.0668339	-0.0689851	0.0312117		0.169158	-0.237382	-0.32981	0.0699117		1
103	R04-B-04	YDR365C	ESF1	essential					0.864	0.359	0.312	0.292	0.313		0.97	0.559	0.433	0.41	0.453		0.534222	-0.0424695	-0.0335275	0.019309		0.410123	-0.108726	-0.0834833	0.0400101		1
104	R05-E-01	YLR086W	SMC4	essential					1.02	0.512	0.433	0.382	0.422		0.99	0.738	0.68	0.601	0.586		0.533456	-0.0741246	-0.0905529	-0.00481665		0.241545	-0.0228885	-0.036315	0.0360291		1
105	R08-B-07	YAL032C	PRP45	essential					0.909	0.405	0.29	0.226	0.366		0.892	0.724	0.556	0.439	0.606		0.531944	-0.118101	-0.16613	0.0388841		0.155209	-0.146174	-0.222011	0.0786834		1
107	R01-C-09	YKL012W	PRP40	essential					0.904	0.402	0.376	0.286	0.425		0.97	0.868	0.81	0.693	0.675		0.52987	-0.0173983	-0.0883807	0.120441		0.0834844	-0.0155431	-0.0598743	0.0225639		1
108	R01-F-12	YHR027C	RPN1	essential					0.932	0.43	0.41	0.395	0.434		0.962	0.866	0.829	0.776	0.676		0.529139	-0.00976425	0.015984	0.101506		0.0773427	0.00772918	0.0449626	0.0260708		1
109	R04-H-08	YBR142W	MAK5	essential					0.896	0.397	0.269	0.243	0.325		0.985	0.856	0.81	0.69	0.722		0.526771	-0.133063	-0.136218	-0.00667224		0.111649	-0.00285812	-0.0509022	0.100708		1
110	R03-H-10	YBR087W	RFC5	essential					0.931	0.432	0.309	0.233	0.334		0.971	0.835	0.778	0.686	0.676		0.525857	-0.126352	-0.187214	-0.0333247		0.1194	-0.0162941	-0.0336539	0.0588403		1
111	R08-A-03	YOL069W	NUF2	essential					0.898	0.4	0.318	0.269	0.34		0.932	0.59	0.458	0.365	0.481		0.525616	-0.0808784	-0.107267	0.00991405		0.338138	-0.113656	-0.171946	0.0462378		1
112	R05-A-11	YOL135C	MED7	essential					0.702	0.21	0.18	0.163	0.185		0.89	0.508	0.44	0.381	0.359		0.524119	-0.027682	-0.0292993	0.0138256		0.381475	-0.0470202	-0.0654632	-0.0369979		1
113	R03-G-07	YDR449C	UTP6	essential					0.765	0.272	0.196	0.143	0.203		0.928	0.76	0.556	0.371	0.623		0.523576	-0.0779192	-0.12247	-0.030659		0.154306	-0.184229	-0.344224	0.0643054		1
114	R07-H-09	YGL111W	NSA1	essential					0.814	0.32	0.26	0.201	0.26		0.94	0.865	0.852	0.761	0.705		0.5234	-0.0583607	-0.103432	-0.00798388		0.0556959	0.0343987	0.0274554	0.0675178		1
115	R03-H-06	YOL010W	RCL1	essential					0.83	0.336	0.252	0.193	0.308		0.996	0.852	0.695	0.492	0.735		0.522982	-0.0850613	-0.130998	0.038036		0.12723	-0.126692	-0.291723	0.123043		1
116	R06-H-12	YPR168W	NUT2	essential					0.912	0.418	0.42	0.353	0.327		0.909	0.774	0.748	0.606	0.544		0.520841	0.0147912	-0.0228947	-0.027173		0.119899	0.0147803	-0.0681818	-0.0605217		1
117	R04-C-11	YPR086W	SUA7	essential					0.661	0.173	0.12	0.095	0.158		0.939	0.476	0.288	0.194	0.336		0.520779	-0.0548384	-0.0728727	0.0188104		0.465869	-0.182459	-0.263072	-0.0352047		1
118	R01-D-09	YKR037C	SPC34	essential					0.709	0.221	0.218	0.219	0.221		0.916	0.329	0.305	0.274	0.273		0.519526	0.0032252	0.0280517	0.049443		0.597524	-0.00813647	-0.00867122	0.0324427		1
119	R06-G-06	YPL233W	NSL1	essential					0.896	0.404	0.294	0.254	0.309		0.969	0.478	0.373	0.312	0.39		0.519053	-0.112469	-0.130288	-0.0356102		0.494715	-0.0899179	-0.119147	0.0378901		1
120	R04-C-01	YIR010W	DSN1	essential					0.736	0.25	0.224	0.179	0.267		0.971	0.46	0.369	0.275	0.356		0.516616	-0.0219533	-0.0535496	0.0784774		0.515806	-0.0753448	-0.145911	0.0095638		1
121	R07-B-02	YBR160W	CDC28	essential					0.899	0.41	0.341	0.307	0.33		0.954	0.542	0.447	0.369	0.437		0.515668	-0.0658562	-0.0711464	-0.0143739		0.411581	-0.0751659	-0.116256	0.0356964		1
122	R05-A-07	YGR195W	SKI6	essential					0.677	0.196	0.149	0.133	0.167		0.944	0.515	0.349	0.328	0.426		0.512644	-0.0473541	-0.0510846	0.00538839		0.429803	-0.155756	-0.138457	0.0489173		1
123	R05-G-08	YDL060W	TSR1	essential					0.739	0.257	0.192	0.139	0.211		0.99	0.789	0.606	0.418	0.646		0.512127	-0.0659112	-0.110895	-0.00351086		0.187634	-0.159205	-0.316711	0.0656834		1
124	R04-B-11	YMR213W	CEF1	essential					0.906	0.421	0.325	0.249	0.407		0.971	0.828	0.747	0.637	0.665		0.511075	-0.0961042	-0.155235	0.0756202		0.1268	-0.0434157	-0.0868979	0.0509196		1
125	R08-H-08	YNL161W	CBK1	essential					0.83	0.347	0.257	0.241	0.29		0.944	0.757	0.742	0.708	0.646		0.510854	-0.0915267	-0.0835725	0.00203545		0.173989	0.0260692	0.0760262	0.09951		1
126	R06-H-02	YGL047W	ALG13	essential					0.985	0.499	0.453	0.42	0.401		0.964	0.732	0.656	0.616	0.521		0.510114	-0.0371416	-0.0290736	-0.0183351		0.221056	-0.0432721	-0.0114081	-0.0481576		1
127	R02-A-02	YKR083C	DAD2	essential					0.721	0.241	0.228	0.275	0.237		0.924	0.487	0.465	0.478	0.368		0.510392	-0.00750049	0.0754799	0.0486125		0.438761	0.00301822	0.076785	-0.00226434		1
128	R03-G-03	YDL103C	QRI1	essential					0.612	0.139	0.097	0.076	0.122		0.932	0.161	0.109	0.097	0.194		0.50552	-0.0433997	-0.0589597	0.00855123		0.791626	-0.0488094	-0.0501408	0.100005		1
129	R02-A-03	YMR112C	MED11	essential					0.709	0.234	0.218	0.269	0.231		0.923	0.368	0.351	0.393	0.356		0.505193	-0.0111078	0.0757535	0.0483727		0.563522	0.00186225	0.0973798	0.106815		1
130	R02-C-04	YLL003W	SFI1	essential					0.837	0.36	0.343	0.307	0.27		0.969	0.472	0.46	0.406	0.407		0.504056	-0.00846443	-0.0160196	-0.0388227		0.501057	0.0133065	0.00353233	0.0679095		1
131	R02-B-03	YDL207W	GLE1	essential					0.725	0.251	0.16	0.098	0.203		0.99	0.713	0.485	0.327	0.417		0.503673	-0.095536	-0.155148	-0.00750572		0.267972	-0.213611	-0.348997	-0.17292		1
133	R02-B-09	YBR254C	TRS20	essential					0.632	0.163	0.131	0.123	0.149		0.943	0.312	0.273	0.188	0.275		0.500588	-0.0313555	-0.0271079	0.0178994		0.643358	-0.0258008	-0.0971365	0.0531986		1
135	R08-H-10	YHR166C	CDC23	essential					0.957	0.482	0.382	0.361	0.381		0.934	0.655	0.502	0.477	0.496		0.498718	-0.0988062	-0.0835315	-0.0261172		0.271491	-0.133369	-0.102042	-0.00158121		1
134	R04-G-05	YBR055C	PRP6	essential					0.857	0.384	0.314	0.241	0.394		0.989	0.788	0.704	0.581	0.654		0.499124	-0.0677679	-0.124366	0.0991727		0.187659	-0.0490166	-0.113922	0.0778825		1
136	R02-G-08	YGR024C	THG1	essential					0.587	0.124	0.106	0.084	0.126		0.97	0.521	0.247	0.129	0.327		0.495148	-0.0166691	-0.0324961	0.0303943		0.450292	-0.275684	-0.391086	-0.0953082		1
137	R01-G-02	YNL272C	SEC2	essential					0.729	0.263	0.247	0.194	0.176		0.984	0.922	0.923	0.821	0.677		0.494748	-0.0102387	-0.0492721	-0.0565452		0.0408499	0.0532096	0.0414591	-0.0317331		1
138	R06-C-12	YMR168C	CEP3	essential					0.911	0.443	0.358	0.321	0.398		0.941	0.594	0.472	0.363	0.486		0.492201	-0.0829874	-0.0901603	0.0394281		0.343197	-0.102295	-0.17865	0.0489732		1
140	R08-A-12	YGR179C	OKP1	essential					0.962	0.494	0.448	0.424	0.46		0.958	0.624	0.556	0.532	0.561		0.490869	-0.0372914	-0.0185981	0.0654269		0.329029	-0.0404658	-0.00120361	0.121718		1
141	R08-D-12	YJL087C	TRL1	essential					0.927	0.46	0.44	0.409	0.409		0.922	0.807	0.789	0.768	0.683		0.490681	-0.00886524	0.000277686	0.0352738		0.0984308	0.0255536	0.0974295	0.0981879		1
142	R06-D-08	YGR278W	CWC22	essential					0.789	0.326	0.258	0.209	0.293		0.963	0.796	0.631	0.469	0.544		0.489874	-0.067241	-0.100121	0.0291675		0.15237	-0.138765	-0.260992	-0.0837775		1
143	R08-A-10	YLR321C	SFH1	essential					0.601	0.143	0.148	0.136	0.145		0.895	0.588	0.471	0.376	0.502		0.48927	0.00994779	0.0110719	0.0346451		0.302068	-0.0970656	-0.156218	0.0775999		1
144	R08-C-10	YDR325W	YCG1	essential					0.819	0.358	0.313	0.274	0.322		0.928	0.633	0.584	0.53	0.541		0.486885	-0.0402344	-0.0547575	0.0323479		0.288555	-0.0187991	-0.0131926	0.0843487		1
145	R06-F-04	YLL011W	SOF1	essential					0.692	0.235	0.162	0.149	0.22		0.95	0.762	0.475	0.326	0.639		0.485791	-0.0756305	-0.0742324	0.0326813		0.174895	-0.276544	-0.402031	0.0844753		1
146	R08-E-01	YHR172W	SPC97	essential					0.865	0.405	0.346	0.322	0.347		0.94	0.585	0.487	0.446	0.502		0.484582	-0.054681	-0.0470233	0.0136852		0.351679	-0.076077	-0.066413	0.0807711		1
147	R04-C-07	YJL025W	RRN7	essential					0.881	0.421	0.31	0.235	0.371		0.98	0.846	0.787	0.704	0.678		0.484164	-0.113092	-0.172604	0.0278749		0.11706	-0.0178998	-0.0230046	0.0499979		1
148	R04-A-05	YLR424W	SPP382	essential					0.766	0.309	0.229	0.186	0.285		1.01	0.773	0.628	0.526	0.636		0.483859	-0.0813404	-0.109914	0.0373005		0.225187	-0.117793	-0.166135	0.0686691		1
149	R06-F-12	YLR298C	YHC1	essential					0.964	0.504	0.393	0.318	0.453		0.961	0.867	0.807	0.681	0.68		0.481997	-0.110604	-0.161137	0.0451177		0.0752536	-0.0178268	-0.0736687	0.0305847		1
150	R05-B-09	YDR487C	RIB3	essential					0.811	0.355	0.254	0.2	0.259		0.958	0.805	0.735	0.515	0.615		0.481581	-0.103745	-0.143261	-0.0478989		0.137697	-0.0324659	-0.213575	0.00559459		1
151	R08-D-04	YDR303C	RSC3	essential					0.636	0.184	0.13	0.117	0.168		0.868	0.234	0.151	0.132	0.206		0.481741	-0.0556412	-0.0577053	0.0199451		0.648412	-0.0792058	-0.083991	0.0395508		1
152	R04-D-04	YKL193C	SDS22	essential					0.761	0.308	0.292	0.276	0.258		0.952	0.631	0.604	0.558	0.561		0.479579	-0.00889021	0.00285073	0.00259403		0.315437	0.00558676	0.023575	0.114318		1
154	R07-C-08	YKR062W	TFA2	essential					0.687	0.241	0.153	0.1	0.173		0.911	0.596	0.419	0.269	0.376		0.473794	-0.0924382	-0.141642	-0.0362682		0.310123	-0.163429	-0.2971	-0.106344		1
155	R05-D-10	YBL034C	STU1	essential					0.86	0.412	0.336	0.287	0.35		0.964	0.637	0.514	0.456	0.536		0.471482	-0.0737238	-0.0981654	0.00994622		0.321479	-0.100978	-0.109005	0.0731566		1
156	R04-B-02	YDR118W	APC4	essential					0.886	0.438	0.355	0.335	0.4		0.969	0.654	0.57	0.531	0.515		0.470803	-0.0808722	-0.0672779	0.0475933		0.308668	-0.056588	-0.0341537	0.0259383		1
158	R02-C-08	YDR243C	PRP28	essential					0.921	0.476	0.399	0.31	0.379		0.977	0.877	0.808	0.684	0.673		0.466582	-0.0729384	-0.140192	-0.0221545		0.0811946	-0.027284	-0.0805267	0.0102646		1
159	R05-G-01	YJL061W	NUP82	essential					0.676	0.238	0.195	0.151	0.178		0.795	0.585	0.512	0.45	0.453		0.465261	-0.0415655	-0.0750586	-0.0263293		0.20204	-0.0482373	-0.0614625	0.012526		1
160	R03-E-01	YDR527W	RBA50	essential					0.941	0.5	0.4	0.313	0.434		1.009	0.796	0.705	0.51	0.638		0.461649	-0.0982668	-0.16293	0.0243289		0.199842	-0.0563597	-0.21025	0.0471418		1
161	R07-G-11	YPL231W	FAS2	essential					0.767	0.33	0.219	0.177	0.247		0.942	0.458	0.348	0.26	0.301		0.461782	-0.115819	-0.144234	-0.0362506		0.487992	-0.0966159	-0.162362	-0.0649237		1
162	R08-C-05	YFR031C	SMC2	essential					0.799	0.363	0.318	0.285	0.317		0.924	0.651	0.608	0.556	0.537		0.459844	-0.0400846	-0.0466225	0.0202039		0.2654	-0.0111005	-4.18647e-05	0.0597502		1
163	R01-B-10	YIR012W	SQT1	essential					0.638	0.209	0.172	0.147	0.209		0.918	0.809	0.588	0.45	0.658		0.45633	-0.0356395	-0.0480479	0.0467583		0.0921887	-0.200391	-0.298249	0.0612548		1
164	R05-D-08	YLR305C	STT4	essential					0.644	0.216	0.204	0.177	0.158		0.994	0.992	0.949	0.854	0.761		0.455071	-0.00711716	-0.0185448	-0.0285987		-0.022826	0.00816708	0.0083049	0.0112628		1
165	R01-D-03	YMR270C	RRN9	essential					0.863	0.435	0.348	0.218	0.339		0.974	0.843	0.791	0.704	0.669		0.449353	-0.0854921	-0.209132	-0.030001		0.114039	-0.0102742	-0.0198334	0.0406344		1
166	R05-H-06	YPR175W	DPB2	essential					0.903	0.475	0.395	0.331	0.405		0.982	0.698	0.645	0.581	0.557		0.448308	-0.0763659	-0.113035	0.0134308		0.275572	-0.0195807	-0.0187841	0.0379225		1
167	R04-D-01	YIL106W	MOB1	essential					0.977	0.549	0.469	0.406	0.41		1.009	0.719	0.547	0.494	0.502		0.446376	-0.0741483	-0.10157	-0.0615256		0.281237	-0.150911	-0.148656	-0.0608779		1
168	R05-E-09	YER013W	PRP22	essential					0.959	0.532	0.459	0.372	0.456		0.984	0.814	0.773	0.691	0.625		0.445744	-0.0667303	-0.125011	0.0182255		0.155015	0.000336665	-0.0052671	0.0100084		1
169	R07-D-06	YGR277C	CAB4	essential					0.561	0.143	0.139	0.116	0.122		0.936	0.641	0.608	0.517	0.527		0.446213	-0.00024473	-0.013742	0.00414109		0.288354	-0.000529718	-0.0377384	0.0563934		1
170	R03-C-09	YKR063C	LAS1	essential					0.669	0.25	0.191	0.17	0.192		0.958	0.647	0.456	0.377	0.54		0.444495	-0.0593259	-0.0647158	-0.020992		0.304716	-0.176137	-0.217348	0.0681568		1
171	R08-F-01	YDL055C	PSA1	essential					0.95	0.525	0.425	0.354	0.444		0.947	0.734	0.652	0.59	0.599		0.443774	-0.0975176	-0.139625	0.0100281		0.201398	-0.0498406	-0.0457005	0.0583633		1
173	R08-B-08	YGL155W	CDC43	essential					0.913	0.49	0.474	0.478	0.517		0.926	0.547	0.531	0.568	0.655		0.442535	-0.00343622	0.0528096	0.145434		0.3774	0.0130899	0.124746	0.334032		1
174	R02-A-12	YIL068C	SEC6	essential					1.021	0.596	0.531	0.479	0.582		0.994	0.727	0.674	0.618	0.593		0.44192	-0.0557524	-0.0628186	0.114772		0.257301	-0.0179422	-0.00364746	0.0574063		1
175	R07-E-03	YJL203W	PRP21	essential					0.792	0.374	0.262	0.182	0.336		0.984	0.667	0.482	0.368	0.587		0.440181	-0.115633	-0.186542	0.0332749		0.310406	-0.168326	-0.249628	0.112475		1
176	R08-B-05	YPR025C	CCL1	essential					0.67	0.255	0.184	0.143	0.212		0.918	0.648	0.48	0.367	0.479		0.440059	-0.0727661	-0.103727	2.04715e-05		0.262379	-0.150468	-0.230782	-0.0178585		1
177	R07-A-12	YOR272W	YTM1	essential					0.663	0.25	0.212	0.202	0.217		0.922	0.562	0.478	0.409	0.493		0.438037	-0.0355434	-0.0250136	0.0121645		0.357416	-0.0617864	-0.0878922	0.0925492		1
179	R08-F-08	YNL163C	RIA1	essential					0.83	0.414	0.365	0.372	0.422		0.915	0.896	0.882	0.832	0.785		0.436984	-0.0430863	0.00508863	0.103232		-0.00287343	0.0350368	0.0825571	0.146169		1
180	R03-D-07	YPR178W	PRP4	essential					0.652	0.241	0.164	0.137	0.193		0.982	0.498	0.404	0.331	0.402		0.436119	-0.0799807	-0.0957359	-0.00974297		0.486989	-0.0765384	-0.116774	0.0334615		1
181	R04-B-10	YGR013W	SNU71	essential					0.88	0.467	0.316	0.22	0.43		0.978	0.911	0.818	0.687	0.728		0.432371	-0.157013	-0.241931	0.0554075		0.0462858	-0.052089	-0.112755	0.0509255		1
182	R07-A-11	YPL204W	HRR25	essential					0.928	0.515	0.412	0.4	0.435		0.961	0.899	0.868	0.76	0.658		0.431118	-0.101215	-0.071528	0.00911712		0.0414269	0.0162753	-0.00972307	-0.0338826		1
183	R05-H-01	YGR186W	TFG1	essential					0.651	0.245	0.172	0.133	0.202		0.93	0.567	0.409	0.318	0.392		0.430632	-0.0753308	-0.105109	-0.00221677		0.360387	-0.143909	-0.205801	-0.0534047		1
184	R05-H-02	YMR277W	FCP1	essential					0.838	0.428	0.31	0.233	0.348		0.964	0.765	0.6	0.447	0.552		0.43016	-0.120809	-0.182803	-0.0103469		0.186172	-0.140517	-0.25545	-0.0398658		1
185	R07-A-01	YJR006W	POL31	essential					1.03	0.617	0.525	0.461	0.516		0.998	0.7	0.641	0.573	0.56		0.428454	-0.0857006	-0.108304	0.00408552		0.28997	-0.0261493	-0.0307993	0.0399866		1
186	R05-E-02	YCR042C	TAF2	essential					0.617	0.216	0.189	0.172	0.175		0.938	0.599	0.532	0.49	0.417		0.426007	-0.0241047	-0.0247482	-0.00605225		0.334816	-0.0407648	-0.0267567	-0.0524124		1
187	R05-H-03	YKL112W	ABF1	essential					0.754	0.35	0.309	0.272	0.267		0.952	0.701	0.666	0.58	0.445		0.425738	-0.0359442	-0.0484186	-0.0317761		0.241441	0.000633308	-0.023193	-0.121238		1
189	R07-A-07	YMR239C	RNT1	essential					0.97	0.565	0.494	0.449	0.513		0.993	0.848	0.808	0.719	0.673		0.421201	-0.0634763	-0.0658608	0.0574386		0.128362	0.00337136	-0.00655443	0.04092		1
190	R06-E-04	YGL112C	TAF6	essential					0.792	0.392	0.292	0.212	0.314		0.946	0.759	0.685	0.465	0.567		0.420336	-0.101503	-0.169167	-0.0157484		0.173939	-0.0395193	-0.226831	-0.012632		1
191	R07-B-03	YPL117C	IDI1	essential					0.812	0.414	0.393	0.371	0.319		0.949	0.717	0.698	0.636	0.5		0.417608	-0.0113762	0.00384793	-0.0333729		0.221432	0.0193547	0.0292006	-0.0615493		1
192	R04-A-01	YBL097W	BRN1	essential					1.016	0.614	0.531	0.465	0.526		1.001	0.77	0.703	0.638	0.627		0.416692	-0.075598	-0.100034	0.0206557		0.21907	-0.0311027	-0.0243495	0.0593056		1
193	R06-G-08	YDR013W	PSF1	essential					0.747	0.353	0.267	0.242	0.281		0.92	0.59	0.472	0.375	0.398		0.414895	-0.0868169	-0.088947	-0.0165161		0.325754	-0.0980662	-0.15957	-0.0693611		1
194	R05-B-02	YDR177W	UBC1	essential					0.867	0.471	0.435	0.446	0.435		0.968	0.663	0.632	0.603	0.564		0.413967	-0.0266556	0.0340555	0.0576287		0.298122	0.00294053	0.0454415	0.0846697		1
195	R06-F-01	YGR091W	PRP31	essential					0.998	0.6	0.466	0.395	0.551		0.969	0.885	0.806	0.709	0.694		0.412752	-0.133775	-0.171447	0.0692477		0.064482	-0.0379679	-0.0580427	0.0310558		1
196	R03-B-06	YER168C	CCA1	essential					0.492	0.107	0.075	0.06	0.075		0.949	0.249	0.188	0.124	0.141		0.41163	-0.0330336	-0.0435296	-0.0185018		0.716147	-0.0538594	-0.109748	-0.0668347		1
197	R08-B-03	YCR035C	RRP43	essential					0.558	0.172	0.127	0.117	0.154		0.874	0.48	0.315	0.272	0.417		0.41101	-0.0458083	-0.0444749	0.0146079		0.394561	-0.15662	-0.170766	0.0733804		1
198	R03-E-06	YIR008C	PRI1	essential					0.772	0.382	0.311	0.284	0.32		0.959	0.776	0.76	0.706	0.621		0.409832	-0.0689603	-0.0688114	0.0032345		0.169384	0.0260292	0.0534664	0.0446065		1
199	R08-C-04	YLR272C	YCS4	essential					0.698	0.311	0.267	0.239	0.284		0.892	0.55	0.478	0.433	0.496		0.408457	-0.0405104	-0.0463626	0.0337692		0.339141	-0.0491014	-0.0455043	0.109412		1
200	R05-H-08	YER022W	SRB4	essential					0.755	0.367	0.273	0.199	0.299		0.932	0.749	0.604	0.425	0.539		0.408071	-0.0954574	-0.157732	-0.00807893		0.170062	-0.119149	-0.265765	-0.0410584		1
201	R04-H-12	YKL078W	DHR2	essential					0.633	0.254	0.16	0.12	0.238		1.002	0.818	0.702	0.486	0.695		0.401334	-0.0988436	-0.131161	0.0356058		0.169362	-0.0829563	-0.263208	0.103273		1
202	R04-F-01	YOR095C	RKI1	essential					0.517	0.142	0.113	0.11	0.117		0.978	0.647	0.561	0.401	0.446		0.399952	-0.0285873	-0.0200837	-0.00138767		0.325356	-0.0592107	-0.187645	-0.0627624		1
203	R01-A-08	YLR153C	ACS2	essential					0.52	0.146	0.149	0.138	0.129		0.834	0.369	0.332	0.28	0.288		0.398771	0.00777269	0.0102456	0.0101173		0.470618	-0.020353	-0.0435288	0.0110508		1
204	R02-F-11	YIL061C	SNP1	essential					0.838	0.457	0.36	0.319	0.415		0.983	0.88	0.826	0.748	0.687		0.398186	-0.0961579	-0.108077	0.046539		0.0842153	-0.0104107	-0.00448998	0.026592		1
205	R08-A-04	YPL151C	PRP46	essential					0.964	0.582	0.45	0.358	0.54		0.947	0.868	0.797	0.714	0.721		0.395999	-0.13205	-0.197507	0.0745045		0.0597486	-0.0300197	-0.0338842	0.0866307		1
206	R07-H-11	YOR056C	NOB1	essential					0.783	0.408	0.352	0.294	0.366		0.956	0.877	0.843	0.747	0.691		0.393007	-0.0511936	-0.0850704	0.0355765		0.0595228	0.0116915	-0.00255636	0.0353342		1
207	R04-D-02	YGL040C	HEM2	essential					0.85	0.474	0.41	0.402	0.373		0.988	0.731	0.634	0.554	0.53		0.39236	-0.0582758	-0.0238427	-0.027907		0.246881	-0.0667139	-0.0870837	-0.0345657		1
208	R08-B-11	YGR048W	UFD1	essential					0.547	0.178	0.14	0.126	0.171		0.885	0.753	0.624	0.5	0.567		0.392554	-0.037701	-0.0399238	0.0305391		0.11733	-0.101106	-0.177171	-0.00628949		1
209	R02-B-04	YPL255W	BBP1	essential					0.594	0.224	0.208	0.209	0.211		0.926	0.385	0.317	0.27	0.319		0.392429	-0.0114074	0.0123372	0.0328728		0.548648	-0.0539701	-0.0728183	0.0373129		1
210	R08-C-02	YNL290W	RFC3	essential					0.907	0.534	0.447	0.395	0.475		0.915	0.708	0.627	0.573	0.599		0.387564	-0.0825254	-0.0986797	0.0412193		0.195858	-0.0501961	-0.039256	0.0858475		1
211	R04-H-01	YBR202W	MCM7	essential					0.965	0.591	0.509	0.422	0.493		0.995	0.923	0.869	0.793	0.723		0.387153	-0.0751547	-0.128025	0.00224748		0.0511447	-0.00798109	0.00574854	0.0312767		1
212	R07-H-01	YOR326W	MYO2	essential					0.704	0.336	0.147	0.238	0.153		0.915	0.379	0.321	0.252	0.293		0.387352	-0.203974	-0.0751667	-0.167534		0.543638	-0.0431732	-0.0887531	0.00744374		1
213	R05-F-11	YFR002W	NIC96	essential					0.649	0.283	0.2	0.172	0.23		0.95	0.633	0.414	0.31	0.485		0.386583	-0.0855171	-0.0986181	-0.00697785		0.311259	-0.208109	-0.28547	0.00635427		1
214	R05-F-04	YKR086W	PRP16	essential					0.97	0.598	0.472	0.396	0.511		0.972	0.915	0.864	0.787	0.704		0.384817	-0.124775	-0.168001	0.0184024		0.0358655	-0.00509236	0.00677946	0.0132709		1
215	R04-A-10	YOR249C	APC5	essential					0.978	0.608	0.51	0.504	0.545		0.989	0.723	0.66	0.635	0.606		0.382403	-0.0927653	-0.0450316	0.0524699		0.256369	-0.029304	0.0216205	0.0797405		1
216	R02-H-08	YNL282W	POP3	essential					0.971	0.605	0.396	0.383	0.504		0.996	0.855	0.763	0.71	0.711		0.378176	-0.218563	-0.191848	0.00140083		0.124058	-0.0541396	-0.0250926	0.0864452		1
217	R07-C-10	YJR093C	FIP1	essential					0.665	0.306	0.223	0.157	0.255		0.946	0.705	0.574	0.471	0.555		0.378448	-0.0848278	-0.142587	0.000820322		0.231021	-0.106045	-0.162322	0.0277374		1
218	R02-A-11	YOR098C	NUP1	essential					0.97	0.605	0.618	0.603	0.6		0.966	0.875	0.849	0.809	0.723		0.377099	0.0328526	0.0811048	0.128722		0.0719569	0.0204872	0.0762905	0.0820166		1
219	R04-E-08	YOR281C	PLP2	essential					0.46	0.108	0.076	0.071	0.114		0.921	0.177	0.116	0.084	0.183		0.376082	-0.0330037	-0.0309845	0.0321198		0.763361	-0.0579276	-0.0831432	0.0677711		1
220	R08-C-08	YJL050W	MTR4	essential					0.472	0.12	0.098	0.084	0.125		0.878	0.255	0.185	0.15	0.252		0.375769	-0.021319	-0.0280859	0.0334782		0.636533	-0.0635427	-0.0839125	0.0814189		1
221	R03-F-02	YBR155W	CNS1	essential					0.933	0.572	0.479	0.388	0.447		1	0.909	0.854	0.768	0.713		0.373655	-0.0881816	-0.149261	-0.0378123		0.0711038	-0.00988572	-0.0103929	0.0321483		1
222	R04-H-10	YBL084C	CDC27	essential					0.633	0.279	0.206	0.178	0.24		1.021	0.578	0.463	0.423	0.496		0.37377	-0.0743119	-0.0867638	0.0106949		0.44267	-0.0954035	-0.0874788	0.0798141		1
223	R04-B-09	YBR060C	ORC2	essential					0.863	0.505	0.415	0.373	0.458		0.982	0.73	0.665	0.605	0.598		0.372175	-0.0867919	-0.0940014	0.0506465		0.241746	-0.0311357	-0.0229078	0.0611989		1
224	R08-D-08	YDR416W	SYF1	essential					0.882	0.524	0.403	0.314	0.477		0.917	0.826	0.775	0.699	0.676		0.371679	-0.12133	-0.188151	0.0548972		0.0731863	-0.0101212	-0.0080511	0.0683541		1
225	R08-E-04	YBR049C	REB1	essential					0.749	0.394	0.262	0.177	0.381		0.931	0.807	0.706	0.463	0.668		0.371844	-0.137683	-0.214796	0.0709059		0.107719	-0.066874	-0.280046	0.0772966		1
226	R02-F-09	YKR022C	NTR2	essential					0.541	0.191	0.161	0.109	0.216		0.97	0.493	0.283	0.21	0.342		0.371762	-0.0282514	-0.0753486	0.0758878		0.47989	-0.205997	-0.261241	-0.0448185		1
227	R06-E-05	YPL122C	TFB2	essential					0.482	0.137	0.096	0.08	0.116		0.912	0.383	0.252	0.132	0.238		0.36779	-0.0423271	-0.0517918	0.00279874		0.536314	-0.124239	-0.241496	-0.0733863		1
228	R03-F-07	YGR211W	ZPR1	essential					0.663	0.316	0.237	0.199	0.204		0.89	0.767	0.71	0.569	0.662		0.365269	-0.0799982	-0.101503	-0.0778443		0.10769	-0.0201364	-0.106574	0.111223		1
229	R05-F-02	YLR071C	RGR1	essential					0.475	0.134	0.097	0.085	0.102		0.95	0.439	0.316	0.277	0.268		0.363563	-0.037887	-0.0422807	-0.0124613		0.516333	-0.112166	-0.121237	-0.0908001		1
230	R04-A-06	YMR001C	CDC5	essential					0.966	0.616	0.502	0.438	0.468		0.981	0.859	0.753	0.642	0.632		0.360666	-0.110646	-0.135738	-0.0584724		0.10435	-0.0695038	-0.113479	-0.027811		1
231	R08-C-03	YDL209C	CWC2	essential					0.918	0.571	0.49	0.427	0.527		0.917	0.883	0.837	0.766	0.718		0.358611	-0.0746216	-0.0997713	0.069391		0.0129326	-0.00133254	0.014616	0.0665962		1
232	R03-H-03	YHR068W	DYS1	essential					0.954	0.607	0.556	0.516	0.515		0.988	0.945	0.92	0.855	0.77		0.357671	-0.0395677	-0.0290407	0.0137846		0.0206649	0.025556	0.0592254	0.0734805		1
234	R01-C-05	YHR052W	CIC1	essential					0.522	0.185	0.165	0.14	0.181		0.925	0.524	0.434	0.364	0.495		0.357925	-0.0171062	-0.0302719	0.0360839		0.400681	-0.070615	-0.103416	0.135504		1
235	R07-A-10	YER006W	NUG1	essential					0.574	0.236	0.189	0.177	0.203		0.912	0.63	0.52	0.42	0.545		0.35767	-0.0461554	-0.0405955	0.00903231		0.275215	-0.0868974	-0.14616	0.093091		1
236	R07-F-09	YDR472W	TRS31	essential					0.791	0.449	0.355	0.384	0.414		0.94	0.793	0.752	0.721	0.63		0.356415	-0.0930001	-0.0186118	0.054033		0.131806	-0.000849904	0.0540603	0.0391709		1
237	R03-D-06	YNL317W	PFS2	essential					0.463	0.13	0.095	0.084	0.108		0.942	0.331	0.265	0.202	0.256		0.355056	-0.0357419	-0.0391113	-9.35839e-05		0.622242	-0.0547941	-0.0998943	0.00665167		1
238	R03-H-07	YDR047W	HEM12	essential					0.642	0.306	0.284	0.243	0.266		0.9	0.446	0.376	0.312	0.351		0.35369	-0.0157452	-0.0358871	0.0154092		0.457334	-0.0527505	-0.0853202	0.0173992		1
239	R08-C-12	YLR409C	UTP21	essential					0.598	0.264	0.214	0.194	0.251		0.908	0.772	0.57	0.481	0.683		0.352633	-0.0487139	-0.0503747	0.0418218		0.120981	-0.181324	-0.220771	0.135186		1
240	R01-B-07	YAL038W	CDC19	essential					0.477	0.147	0.14	0.12	0.131		0.938	0.661	0.566	0.427	0.412		0.351383	-0.00352237	-0.0131894	0.0116673		0.269277	-0.068442	-0.170266	-0.124915		1
241	R05-D-01	YDR246W	TRS23	essential					1.002	0.661	0.632	0.614	0.55		0.981	0.844	0.806	0.766	0.621		0.349803	-0.0130344	0.0330104	0.000666786		0.120206	0.00537252	0.0558422	-0.0272751		1
242	R02-H-04	YLR145W	RMP1	essential					0.819	0.483	0.367	0.31	0.409		0.976	0.86	0.808	0.724	0.701		0.349068	-0.116896	-0.147909	0.00991551		0.098133	-0.00931363	-0.0130513	0.0672322		1
243	R03-F-09	YBR247C	ENP1	essential					0.603	0.272	0.202	0.151	0.221		0.944	0.792	0.66	0.464	0.651		0.349195	-0.0711242	-0.112545	-0.0067863		0.136991	-0.102243	-0.262952	0.0694759		1
244	R02-C-12	YNL313C	EMW1	essential					0.985	0.646	0.567	0.468	0.56		0.991	0.913	0.874	0.793	0.733		0.348042	-0.070109	-0.131593	0.0304674		0.0575875	0.00815766	0.0163194	0.0557751		1
245	R03-D-01	YNL261W	ORC5	essential					0.982	0.644	0.561	0.479	0.578		0.993	0.768	0.718	0.641	0.635		0.347018	-0.074699	-0.11574	0.0565452		0.212928	-0.0122848	-0.0185225	0.0725618		1
246	R04-G-01	YDR356W	SPC110	essential					0.462	0.136	0.119	0.109	0.118		0.964	0.262	0.198	0.171	0.219		0.347364	-0.015177	-0.0147091	0.0065538		0.717884	-0.0564656	-0.0653219	0.0280583		1
247	R04-A-02	YDR164C	SEC1	essential					0.487	0.162	0.085	0.086	0.096		0.833	0.307	0.257	0.208	0.257		0.345609	-0.0823481	-0.0719111	-0.0512898		0.535125	-0.0383328	-0.0670986	0.0334144		1
248	R02-B-11	YDL140C	RPO21	essential					0.553	0.227	0.212	0.2	0.267		0.984	0.72	0.634	0.55	0.576		0.344988	-0.010185	-0.00213668	0.103836		0.254381	-0.055086	-0.0804063	0.041129		1
249	R01-G-08	YKL182W	FAS1	essential					0.744	0.416	0.381	0.292	0.331		0.95	0.882	0.892	0.853	0.709		0.342206	-0.0271713	-0.096372	-0.0196629		0.0480454	0.0609718	0.123346	0.0551185		1
250	R07-B-04	YDR087C	RRP1	essential					0.664	0.34	0.275	0.242	0.289		0.933	0.862	0.846	0.778	0.707		0.339885	-0.0634239	-0.074614	0.00842694		0.0516432	0.0308885	0.0516662	0.0734746		1
251	R06-A-02	YKL004W	AUR1	essential					1.008	0.678	0.617	0.629	0.451		0.993	0.93	0.894	0.817	0.531		0.337518	-0.048765	0.0328777	-0.149376		0.0416811	0.012459	0.0280519	-0.243532		1
253	R01-E-01	YDR224C	HTB1	essential					0.463	0.148	0.135	0.132	0.12		0.853	0.233	0.196	0.176	0.168		0.33521	-0.0102874	0.000596409	-0.00402411		0.633989	-0.0280374	-0.0284784	-0.0123169		1
254	R06-D-01	YGR103W	NOP7	essential					0.537	0.222	0.2	0.194	0.203		0.9	0.524	0.423	0.349	0.471		0.333278	-0.0182624	-0.00406817	0.0244678		0.374881	-0.0828644	-0.121981	0.102078		1
256	R06-A-10	YJL085W	EXO70	essential					0.983	0.659	0.537	0.451	0.543		0.972	0.801	0.714	0.587	0.588		0.331556	-0.118417	-0.167018	-0.00641196		0.156373	-0.0516228	-0.120238	-0.0277815		1
257	R08-E-11	YLR175W	CBF5	essential					0.493	0.182	0.148	0.137	0.177		0.91	0.507	0.342	0.298	0.474		0.330017	-0.0330511	-0.0306863	0.0340865		0.403172	-0.155094	-0.167129	0.124226		1
258	R03-E-03	YGL169W	SUA5	essential					0.693	0.379	0.291	0.237	0.291		0.985	0.795	0.738	0.529	0.676		0.328102	-0.0883028	-0.123816	-0.0319194		0.176131	-0.0185543	-0.185678	0.101124		1
259	R03-D-09	YFR005C	SAD1	essential					0.916	0.598	0.443	0.383	0.487		0.988	0.944	0.889	0.802	0.738		0.32669	-0.157618	-0.18413	-0.0134278		0.021722	-0.00790811	-0.00531158	0.0299693		1
260	R01-B-06	YOR310C	NOP58	essential					0.476	0.169	0.17	0.144	0.179		0.97	0.801	0.6	0.504	0.672		0.32605	0.00619693	-0.00766851	0.051072		0.154309	-0.178572	-0.222961	0.0892101		1
261	R07-C-12	YBR211C	AME1	essential					0.65	0.34	0.269	0.235	0.286		0.927	0.578	0.465	0.364	0.454		0.324815	-0.0702189	-0.0832989	0.00444816		0.345663	-0.0931763	-0.160499	0.0213183		1
263	R06-H-01	YJR112W	NNF1	essential					0.661	0.355	0.29	0.264	0.288		0.918	0.646	0.533	0.46	0.455		0.320118	-0.0629744	-0.0638568	-0.00943736		0.264493	-0.0893341	-0.113568	-0.0491705		1
264	R07-B-12	YMR146C	TIF34	essential					0.91	0.599	0.508	0.457	0.509		0.99	0.826	0.774	0.689	0.653		0.319129	-0.0851075	-0.0934214	0.0146473		0.148522	-0.0112347	-0.0204273	0.0363206		1
265	R05-E-07	YAL001C	TFC3	essential					0.92	0.609	0.585	0.502	0.548		0.998	0.904	0.878	0.82	0.729		0.318868	-0.00893017	-0.0486155	0.0553461		0.0743252	0.0221257	0.0592489	0.0597178		1
266	R03-C-02	YGL122C	NAB2	essential					0.526	0.227	0.184	0.181	0.192		0.954	0.58	0.48	0.433	0.427		0.315925	-0.0418951	-0.0257099	0.00436628		0.371412	-0.0785867	-0.0772167	-0.0184003		1
267	R07-G-08	YCR093W	CDC39	essential					0.74	0.438	0.373	0.342	0.388		0.962	0.87	0.839	0.771	0.695		0.313645	-0.0604871	-0.0585931	0.0316782		0.0731143	0.0146367	0.0345462	0.0483048		1
268	R01-H-08	YMR308C	PSE1	essential					0.603	0.305	0.249	0.212	0.199		0.869	0.721	0.685	0.614	0.515		0.312812	-0.0542802	-0.0732461	-0.0723477		0.134644	0.000649788	-0.00225546	-0.0448863		1
269	R08-A-05	YHR118C	ORC6	essential					0.934	0.631	0.532	0.466	0.532		0.92	0.728	0.656	0.601	0.611		0.309682	-0.0932086	-0.117536	0.00987018		0.179876	-0.0390438	-0.0257441	0.0814189		1
270	R07-B-11	YDR531W	CAB1	essential					0.403	0.112	0.109	0.101	0.13		0.886	0.139	0.125	0.111	0.16		0.310316	-4.12046e-05	0.00182616	0.0489298		0.76741	-0.00773624	-0.00955822	0.0759068		1
271	R04-E-09	YFR052W	RPN12	essential					0.736	0.439	0.385	0.351	0.445		1.002	0.852	0.812	0.769	0.726		0.308237	-0.0479996	-0.0485294	0.106172		0.133421	0.00359738	0.0510984	0.110508		1
272	R07-B-01	YLR291C	GCD7	essential					0.866	0.567	0.387	0.246	0.426		0.986	0.898	0.832	0.722	0.692		0.307047	-0.186859	-0.319927	-0.0601511		0.0682838	-0.0227567	-0.0556957	0.0145283		1
273	R02-D-05	YPL190C	NAB3	essential					0.408	0.12	0.112	0.11	0.121		0.966	0.676	0.522	0.4	0.456		0.306878	-0.00546398	0.00417213	0.0281732		0.282316	-0.133296	-0.219538	-0.0794902		1
274	R08-D-03	YLR045C	STU2	essential					0.919	0.621	0.536	0.491	0.52		0.914	0.834	0.807	0.757	0.676		0.304561	-0.0776532	-0.0754936	0.00498042		0.0616337	0.0170569	0.0552744	0.0598974		1
275	R05-B-04	YHR089C	GAR1	essential					0.546	0.257	0.194	0.159	0.223		0.946	0.782	0.57	0.427	0.662		0.304377	-0.0636462	-0.0860812	0.0124043		0.149626	-0.191895	-0.298173	0.0953671		1
276	R01-H-09	YGL207W	SPT16	essential					1.009	0.711	0.64	0.464	0.596		0.986	0.869	0.784	0.649	0.548		0.302211	-0.0591012	-0.208221	0.00654795		0.0989392	-0.0455534	-0.115387	-0.155373		1
277	R05-C-01	YNL245C	CWC25	essential					1.03	0.732	0.617	0.515	0.596		0.99	0.961	0.898	0.809	0.724		0.301663	-0.108302	-0.168098	-0.0166053		0.00581559	-0.0158562	-0.0146186	-0.00749969		1
279	R08-G-07	YJR041C	URB2	essential					0.577	0.29	0.227	0.191	0.261		0.879	0.816	0.667	0.532	0.722		0.301363	-0.0626572	-0.0827627	0.0264185		0.0445415	-0.119818	-0.204163	0.142992		1
280	R01-B-03	YER165W	PAB1	essential					0.59	0.303	0.269	0.239	0.22		0.801	0.778	0.731	0.636	0.474		0.301023	-0.0294251	-0.0375423	-0.0422912		0.00421524	-0.00837897	-0.0352814	-0.162243		1
281	R06-G-09	YPR107C	YTH1	essential					0.589	0.304	0.236	0.211	0.243		0.955	0.684	0.621	0.536	0.548		0.298844	-0.0679002	-0.0733843	-0.0128897		0.262508	-0.0315076	-0.0596781	0.0401868		1
282	R04-C-03	YDL003W	MCD1	essential					0.469	0.187	0.123	0.119	0.246		0.957	0.443	0.329	0.291	0.34		0.29867	-0.0668764	-0.0585315	0.120086		0.519329	-0.101918	-0.108139	0.00525008		1
283	R03-A-12	YPL128C	TBF1	essential					0.853	0.563	0.552	0.527	0.491		0.919	0.786	0.764	0.71	0.644		0.297464	0.00441389	0.0331185	0.030466		0.117534	0.0199127	0.0478461	0.0660691		1
284	R02-G-05	YJL035C	TAD2	essential					0.88	0.59	0.457	0.395	0.461		0.989	0.852	0.794	0.729	0.693		0.296759	-0.132942	-0.160422	-0.0390903		0.120006	-0.0164472	0.00159347	0.0645468		1
285	R03-G-06	YDL147W	RPN5	essential					0.535	0.253	0.21	0.177	0.231		0.962	0.743	0.711	0.642	0.608		0.296946	-0.041116	-0.0593386	0.0274245		0.207364	0.0063472	0.00914219	0.0613844		1
286	R07-E-02	YKR025W	RPC37	essential					0.438	0.159	0.119	0.099	0.138		0.885	0.504	0.42	0.334	0.417		0.296172	-0.0405354	-0.0524744	0.00772068		0.380543	-0.0650635	-0.119403	0.0480104		1
289	R08-F-12	YLR196W	PWP1	essential					0.574	0.294	0.218	0.206	0.248		0.892	0.809	0.625	0.554	0.694		0.293723	-0.0772599	-0.0685624	0.00476693		0.0653569	-0.159189	-0.169536	0.111394		1
290	R03-C-04	YIL104C	SHQ1	essential					0.624	0.343	0.293	0.27	0.314		0.898	0.813	0.782	0.694	0.6		0.29352	-0.0463465	-0.0431822	0.0382758		0.0673206	0.011416	-0.000497143	-0.0237534		1
291	R02-C-10	YLR129W	DIP2	essential					0.738	0.455	0.435	0.433	0.293		0.945	0.888	0.862	0.785	0.712		0.292749	-0.00901507	0.035567	-0.11306		0.036543	0.0212217	0.0328454	0.0529542		1
292	R03-H-04	YJR072C	NPA3	essential					0.481	0.205	0.173	0.147	0.175		0.909	0.479	0.371	0.27	0.344		0.291741	-0.0300969	-0.0436377	0.00607565		0.431738	-0.0932022	-0.172184	-0.0272339		1
293	R04-C-06	YKL089W	MIF2	essential					0.82	0.539	0.434	0.395	0.454		0.982	0.817	0.72	0.646	0.636		0.288403	-0.102761	-0.104192	0.0078552		0.14978	-0.0618546	-0.0641314	0.0221575		1
294	R07-D-09	YKL052C	ASK1	essential					0.535	0.264	0.22	0.208	0.23		0.858	0.435	0.361	0.327	0.365		0.284819	-0.0419188	-0.0330049	0.0139703		0.425618	-0.0578264	-0.0551279	0.0485257		1
295	R04-F-05	YKL033W	TTI1	essential					0.86	0.584	0.534	0.51	0.392		0.994	0.917	0.746	0.667	0.616		0.281846	-0.0391244	-0.0111266	-0.123987		0.0564552	-0.13861	-0.14385	-0.111406		1
296	R03-C-11	YDR240C	SNU56	essential					0.931	0.655	0.533	0.424	0.521		0.991	0.929	0.886	0.785	0.734		0.279992	-0.118537	-0.196106	-0.0311795		0.0406742	0.00460737	-0.0104949	0.0402545		1
298	R07-C-01	YOR261C	RPN8	essential					0.789	0.518	0.443	0.352	0.42		0.979	0.888	0.843	0.728	0.672		0.278187	-0.0694148	-0.134389	-0.0140844		0.0716307	6.35662e-05	-0.0376991	-0.00275607		1
299	R05-F-07	YNL113W	RPC19	essential					0.57	0.304	0.232	0.189	0.242		0.941	0.766	0.672	0.506	0.616		0.278392	-0.0724302	-0.10068	-0.014216		0.161379	-0.0613955	-0.183488	0.0482136		1
300	R06-G-01	YOL149W	DCP1	essential					0.8	0.529	0.451	0.44	0.484		0.964	0.906	0.89	0.827	0.763		0.2779	-0.0724827	-0.0373357	0.0586684		0.0371233	0.0333746	0.0657981	0.104957		1
301	R02-G-06	YDL139C	SCM3	essential					0.911	0.64	0.487	0.403	0.537		0.991	0.838	0.699	0.569	0.668		0.275001	-0.154094	-0.205623	0.00657866		0.136869	-0.107439	-0.181627	0.044527		1
303	R08-H-11	YML043C	RRN11	essential					0.969	0.698	0.57	0.479	0.585		0.944	0.864	0.815	0.751	0.71		0.273487	-0.124043	-0.175277	0.00629206		0.060881	-0.00574686	0.0161362	0.0755387		1
304	R06-D-02	YJR046W	TAH11	essential					0.966	0.696	0.638	0.598	0.629		0.977	0.814	0.764	0.703	0.678		0.272463	-0.0448281	-0.0254295	0.0668526		0.147791	-0.00968561	0.00958439	0.0838246		1
305	R02-H-07	YER029C	SMB1	essential					0.894	0.626	0.465	0.458	0.56		1	0.925	0.865	0.78	0.735		0.272138	-0.163574	-0.121949	0.0525181		0.0541905	-0.0145496	-0.0124547	0.0458756		1
306	R03-E-05	YKR038C	KAE1	essential					0.986	0.716	0.606	0.559	0.565		0.997	0.94	0.882	0.811	0.761		0.271941	-0.103119	-0.0958673	-0.0400788		0.0352383	-0.0114749	0.0100554	0.0662311		1
307	R02-E-10	YGL099W	LSG1	essential					0.368	0.113	0.11	0.093	0.106		0.865	0.454	0.501	0.441	0.339		0.271538	-1.12376e-05	-0.00920193	0.015997		0.412757	0.077991	0.0658766	-0.00777059		1
308	R04-B-12	YMR227C	TAF7	essential					0.614	0.354	0.293	0.251	0.297		0.933	0.83	0.794	0.718	0.658		0.270628	-0.0584744	-0.0788833	0.00360152		0.0854699	0.00680865	0.0112354	0.0390561		1
310	R05-H-05	YBL035C	POL12	essential					1.037	0.77	0.651	0.585	0.645		0.999	0.817	0.754	0.694	0.642		0.267301	-0.111693	-0.123146	0.00648507		0.167323	-0.0239927	-0.00472547	0.0305141		1
311	R01-D-12	YBR167C	POP7	essential					0.648	0.39	0.368	0.327	0.342		0.915	0.83	0.783	0.715	0.666		0.267535	-0.0132279	-0.0242818	0.0235919		0.066894	-0.0054408	0.00752255	0.0501982		1
312	R07-H-02	YDR180W	SCC2	essential					1.021	0.755	0.636	0.574	0.605		0.992	0.901	0.834	0.754	0.687		0.266617	-0.112143	-0.120256	-0.0300273		0.0713045	-0.0237008	-0.019263	0.00439322		1
313	R08-B-10	YIL083C	CAB2	essential					0.856	0.594	0.52	0.442	0.578		0.935	0.915	0.908	0.874	0.793		0.266515	-0.0660048	-0.106519	0.111672		-0.00231816	0.0439054	0.114453	0.137226		1
316	R08-G-06	YIL126W	STH1	essential					0.848	0.588	0.501	0.429	0.502		0.948	0.895	0.87	0.786	0.701		0.264518	-0.0809072	-0.116033	0.0174914		0.0322394	0.0227308	0.0266835	0.0302343		1
317	R03-C-05	YDR168W	CDC37	essential					0.878	0.619	0.547	0.508	0.491		0.999	0.874	0.848	0.784	0.708		0.262633	-0.0629906	-0.0521967	-0.031276		0.10707	0.0204306	0.046407	0.0621824		1
318	R04-C-09	YOR262W	GPN2	essential					0.509	0.259	0.193	0.178	0.212		0.948	0.725	0.588	0.469	0.578		0.262344	-0.0669837	-0.0647131	-0.00438967		0.211943	-0.111596	-0.185939	0.0386291		1
319	R04-E-06	YOL077C	BRX1	essential					0.438	0.191	0.143	0.159	0.174		0.951	0.57	0.414	0.373	0.495		0.26089	-0.0486364	-0.0133139	0.0201849		0.378887	-0.141512	-0.140903	0.086878		1
320	R05-H-12	YBR123C	TFC1	essential					0.995	0.739	0.676	0.593	0.632		0.951	0.905	0.875	0.814	0.729		0.25627	-0.0492021	-0.079042	0.0234223		0.0247645	0.0177279	0.0507661	0.0586607		1
321	R05-E-10	YLR383W	SMC6	essential					0.916	0.663	0.634	0.533	0.585		0.99	0.881	0.849	0.775	0.688		0.255025	-0.0129745	-0.0696909	0.0448808		0.0903822	0.0141447	0.0278688	0.0269276		1
323	R04-H-09	YJL090C	DPB11	essential					0.931	0.679	0.583	0.534	0.582		0.995	0.887	0.843	0.789	0.703		0.253531	-0.0883727	-0.0860908	0.0232615		0.0891997	0.00112065	0.038853	0.0414765		1
324	R06-E-07	YDL017W	CDC7	essential					0.906	0.655	0.579	0.523	0.567		0.971	0.867	0.825	0.729	0.685		0.253081	-0.0664418	-0.0732776	0.0298284		0.0855735	0.00221775	-0.0142628	0.0375485		1
325	R07-G-06	YNL262W	POL2	essential					0.909	0.658	0.56	0.532	0.561		0.97	0.808	0.767	0.702	0.626		0.253003	-0.091267	-0.0654189	0.0185633		0.146909	-2.3543e-06	0.0146893	0.0177437		1
326	R06-A-07	YGR119C	NUP57	essential					0.92	0.669	0.579	0.491	0.556		0.964	0.854	0.798	0.694	0.661		0.252716	-0.0818773	-0.128415	-0.000195941		0.0920916	-0.014107	-0.0438375	0.0178644		1
328	R01-D-01	YDL105W	NSE4	essential					1.026	0.774	0.742	0.648	0.681		0.989	0.915	0.881	0.805	0.719		0.251051	-0.0130456	-0.0493925	0.0498203		0.0534094	0.0138386	0.0290567	0.0341623		1
329	R08-E-12	YPR041W	TIF5	essential					0.37	0.133	0.11	0.095	0.119		0.897	0.332	0.239	0.203	0.254		0.25164	-0.022062	-0.0287713	0.0111877		0.574745	-0.0848044	-0.0997138	0.00280907		1
330	R06-A-04	YGL172W	NUP49	essential					0.962	0.712	0.617	0.532	0.593		0.967	0.87	0.815	0.714	0.679		0.250517	-0.0862513	-0.124956	0.00146664		0.0782743	-0.0120894	-0.0359984	0.0260207		1
331	R07-E-07	YDL043C	PRP11	essential					0.9	0.652	0.543	0.455	0.575		0.962	0.922	0.853	0.726	0.677		0.24993	-0.103904	-0.154337	0.0437461		0.018146	-0.0247414	-0.0761152	-0.0317331		1
332	R06-F-08	YOL146W	PSF3	essential					0.658	0.416	0.379	0.365	0.361		0.904	0.774	0.765	0.686	0.598		0.249634	-0.0294363	-0.00580131	0.0201249		0.114739	0.0337113	0.0308281	0.0146873		1
334	R04-G-06	YBL014C	RRN6	essential				0.912	0.792	0.549	0.5	0.4	0.664		0.94	0.937	0.899	0.778	0.683		0.247237	-0.0390408	-0.109014	0.275344		-0.020414	0.0106273	-0.027615	-0.0392328		1
335	R05-C-07	YBR252W	DUT1	essential					0.772	0.53	0.435	0.407	0.448		0.944	0.707	0.659	0.631	0.554		0.246657	-0.0917053	-0.0793812	0.00982047		0.226843	-0.0135043	0.0335833	0.0242304		1
336	R04-E-04	YHR062C	RPP1	essential					0.367	0.137	0.125	0.095	0.119		0.927	0.453	0.227	0.156	0.321		0.244001	-0.00948456	-0.0331814	0.00677752		0.477798	-0.226074	-0.285789	-0.0317831		1
337	R03-H-11	YJR068W	RFC2	essential					0.625	0.39	0.317	0.263	0.322		0.944	0.578	0.491	0.425	0.517		0.242777	-0.0709856	-0.103686	-0.00293327		0.363207	-0.0642231	-0.0850036	0.109062		1
338	R01-C-12	YNL152W	INN1	essential					0.921	0.68	0.654	0.629	0.542		0.96	0.897	0.877	0.766	0.635		0.241664	-0.00906751	0.0306727	-0.0308915		0.0425091	0.0284117	-0.000183158	-0.0638018		1
339	R04-C-10	YPR180W	AOS1	essential					0.57	0.337	0.283	0.278	0.304		0.929	0.737	0.675	0.625	0.596		0.242008	-0.0510563	-0.0266414	0.0316284		0.179651	-0.0273994	-0.00555492	0.0510138		1
340	R06-G-05	YJR057W	CDC8	essential					0.919	0.679	0.593	0.565	0.533		0.978	0.812	0.772	0.716	0.632		0.240614	-0.0770477	-0.0476293	-0.0417253		0.150937	0.00133724	0.0277877	0.0218719		1
341	R04-D-05	YPR110C	RPC40	essential					0.407	0.18	0.138	0.126	0.156		0.938	0.644	0.431	0.322	0.511		0.239649	-0.0421711	-0.0421289	0.0084401		0.287247	-0.200806	-0.282246	0.0309381		1
342	R01-A-06	YGR264C	MES1	essential					0.55	0.321	0.298	0.236	0.26		0.934	0.854	0.843	0.764	0.665		0.23812	-0.0164282	-0.06111	-0.00908642		0.0611319	0.0360044	0.0427961	0.0234354		1
343	R04-E-03	YHR058C	MED6	essential					0.778	0.545	0.412	0.407	0.408		0.981	0.889	0.822	0.758	0.659		0.236578	-0.134291	-0.0959192	-0.059768		0.0726376	-0.0243788	-0.00162749	-0.021919		1
344	R03-G-12	YPR133C	SPN1	essential					0.601	0.372	0.316	0.29	0.273		0.882	0.701	0.627	0.564	0.521		0.236789	-0.0522724	-0.0503418	-0.0480744		0.169202	-0.0427965	-0.042995	-0.0153881		1
345	R04-A-09	YGR099W	TEL2	essential					0.901	0.668	0.566	0.493	0.547		0.998	0.931	0.857	0.699	0.685		0.233366	-0.0954973	-0.124831	-0.0110297		0.045784	-0.0298008	-0.119045	-0.0301048		1
346	R06-B-02	YJL041W	NSP1	essential					0.358	0.138	0.118	0.107	0.138		0.91	0.382	0.286	0.205	0.271		0.233211	-0.0185146	-0.0193956	0.0308739		0.535307	-0.08532	-0.150093	-0.0263682		1
347	R05-A-04	YLR022C	SDO1	essential					1.012	0.778	0.71	0.638	0.652		0.971	0.909	0.878	0.819	0.714		0.231571	-0.0536959	-0.0662096	0.00694861		0.041176	0.0168403	0.0527259	0.033541		1
348	R07-D-07	YDR288W	NSE3	essential					0.897	0.667	0.57	0.511	0.554		0.959	0.874	0.834	0.745	0.679		0.230163	-0.0898648	-0.101396	-0.00064339		0.06579	0.00484045	-0.00186036	0.0217924		1
349	R02-G-09	YOL102C	TPT1	essential					0.764	0.537	0.473	0.449	0.42		1.004	0.933	0.914	0.851	0.77		0.230328	-0.0563879	-0.0349898	-0.0350326		0.0498618	0.0315594	0.0669599	0.0861655		1
350	R08-F-10	YIL075C	RPN2	essential					0.829	0.601	0.499	0.492	0.536		0.934	0.883	0.846	0.798	0.737		0.229733	-0.0975051	-0.0522022	0.0482513		0.0304765	0.00868974	0.05422	0.0930586		1
351	R02-A-05	YBR233W-A	DAD3	essential					0.459	0.243	0.224	0.218	0.226		0.928	0.796	0.783	0.707	0.629		0.226163	-0.0142356	0.00255526	0.0318185		0.116251	0.0305	0.0335624	0.0346069		1
352	R07-A-04	YGR002C	SWC4	essential					0.919	0.695	0.629	0.566	0.538		1.005	0.887	0.825	0.701	0.571		0.222973	-0.0539181	-0.0640292	-0.0527346		0.0995196	-0.0189239	-0.0700579	-0.142368		1
353	R07-E-04	YKL095W	YJU2	essential					0.93	0.708	0.573	0.415	0.61		0.962	0.948	0.873	0.729	0.706		0.220481	-0.131671	-0.265707	0.0284232		-0.00933811	-0.0299538	-0.0998864	-0.0188273		1
354	R04-E-02	YGL044C	RNA15	essential					0.359	0.15	0.101	0.105	0.131		0.934	0.415	0.333	0.291	0.326		0.221057	-0.0509976	-0.0351074	0.00835968		0.525191	-0.0678652	-0.0785407	0.0153498		1
355	R05-D-12	YNL102W	POL1	essential					0.994	0.771	0.693	0.649	0.671		0.956	0.827	0.787	0.739	0.637		0.219913	-0.0652307	-0.0448442	0.0398653		0.112377	0.00218479	0.0403968	0.0129794		1
356	R07-C-06	YDL108W	KIN28	essential					0.391	0.183	0.261	0.206	0.216		0.872	0.841	0.827	0.746	0.676		0.219119	0.0938192	0.0538191	0.0847081		0.0108905	0.0319291	0.034261	0.0524978		1
357	R06-D-06	YPL007C	TFC8	essential					0.676	0.462	0.399	0.327	0.418		0.911	0.815	0.757	0.632	0.604		0.218293	-0.0575029	-0.103664	0.0450051		0.0786223	-0.0185378	-0.079344	-0.0202966		1
358	R06-F-02	YNL124W	NAF1	essential					0.952	0.732	0.589	0.522	0.645		0.959	0.929	0.882	0.79	0.715		0.217702	-0.140012	-0.159414	0.0483814		0.00765048	0.00015303	-0.00430683	0.0137921		1
359	R03-B-04	YFR028C	CDC14	essential					0.96	0.743	0.641	0.598	0.599		0.973	0.839	0.802	0.745	0.669		0.214185	-0.0932498	-0.0772486	-0.0247544		0.117236	0.00620359	0.0351375	0.0448627		1
360	R06-E-10	YLR033W	RSC58	essential					0.479	0.273	0.208	0.149	0.256		0.901	0.692	0.59	0.453	0.555		0.214616	-0.0654317	-0.116129	0.0385303		0.198324	-0.0744855	-0.170857	0.0414794		1
361	R08-D-09	YLR115W	CFT2	essential					0.299	0.097	0.077	0.062	0.092		0.841	0.278	0.234	0.2	0.232		0.214905	-0.0197433	-0.0300229	0.0150699		0.574036	-0.0332899	-0.0463442	0.0292509		1
362	R04-G-10	YOR373W	NUD1	essential					0.894	0.679	0.625	0.469	0.429		0.977	0.98	0.956	0.881	0.76		0.213703	-0.0408076	-0.166736	-0.179656		-0.0276849	0.0286472	0.0544057	0.022555		1
364	R01-H-04	YNL088W	TOP2	essential					0.613	0.407	0.368	0.337	0.347		1.001	0.811	0.736	0.67	0.582		0.211117	-0.031971	-0.0306179	0.0114801		0.17573	-0.0376948	-0.0280859	-0.0467089		1
365	R04-D-08	YOR340C	RPA43	essential					0.567	0.364	0.244	0.189	0.301		0.957	0.822	0.747	0.68	0.654		0.209011	-0.124992	-0.166832	-0.0021188		0.118694	-0.0370732	-0.0273376	0.0419417		1
366	R03-G-09	YDL097C	RPN6	essential					0.376	0.178	0.152	0.135	0.174		0.929	0.657	0.568	0.498	0.567		0.208485	-0.0241109	-0.0287576	0.0345179		0.264217	-0.0619865	-0.0781665	0.0951904		1
367	R07-A-09	YER021W	RPN3	essential					0.398	0.2	0.159	0.157	0.198		0.908	0.651	0.51	0.461	0.54		0.20791	-0.0404392	-0.0257181	0.0420923		0.248888	-0.120232	-0.117616	0.0639285		1
368	R07-H-05	YJL074C	SMC3	essential					0.351	0.158	0.125	0.096	0.118		0.76	0.24	0.229	0.164	0.223		0.203625	-0.0326378	-0.055094	-0.017702		0.530614	0.00131135	-0.0507295	0.0568852		1
369	R04-B-01	YGL113W	SLD3	essential					0.975	0.772	0.696	0.669	0.682		0.982	0.879	0.838	0.787	0.7		0.198358	-0.0629357	-0.0211328	0.0533516		0.0842404	0.00400938	0.0448344	0.0457549		1
370	R02-D-02	YNL112W	DBP2	essential					0.393	0.203	0.204	0.19	0.248		0.942	0.78	0.604	0.492	0.718		0.199221	0.0072158	0.0119172	0.105098		0.147612	-0.151919	-0.215613	0.175476		1
371	R01-H-01	YGL150C	INO80	essential					0.987	0.785	0.763	0.704	0.738		0.974	0.942	0.914	0.829	0.737		0.196942	-0.00139097	0.0079585	0.113289		0.00938829	0.0220457	0.0302184	0.0306907		1
372	R01-H-05	YMR076C	PDS5	essential					0.627	0.433	0.425	0.373	0.376		1.03	0.862	0.805	0.723	0.61		0.197521	0.00391569	-0.0146189	0.0212757		0.151746	-0.0147685	-0.0164031	-0.0616229		1
373	R08-C-11	YEL055C	POL5	essential					0.268	0.084	0.064	0.056	0.08		0.943	0.464	0.236	0.134	0.373		0.195869	-0.0201328	-0.0231341	0.0134878		0.482682	-0.22768	-0.324645	0.0290123		1
374	R02-A-10	YDR407C	TRS120	essential					1.012	0.812	0.761	0.673	0.607		0.983	0.891	0.844	0.746	0.637		0.194084	-0.0334244	-0.0602715	-0.0902193		0.0725874	-0.0019941	-0.0185931	-0.0546738		1
375	R07-B-05	YBR256C	RIB5	essential					0.924	0.726	0.692	0.622	0.591		0.963	0.946	0.934	0.828	0.729		0.194177	-0.0167491	-0.0287289	-0.0166214		-0.00619195	0.0400891	0.0247525	0.0153203		1
376	R03-H-02	YDR427W	RPN9	essential					1.026	0.826	0.773	0.755	0.721		1.018	0.964	0.944	0.88	0.787		0.193719	-0.0352699	0.02603	0.0455388		0.0315401	0.0321975	0.0700814	0.0770728		1
377	R05-D-05	YIL129C	TAO3	essential					0.976	0.783	0.688	0.602	0.659		0.949	0.914	0.879	0.843	0.777		0.187306	-0.0841236	-0.116387	0.0107197		0.0131868	0.0126685	0.0771435	0.115999		1
378	R08-D-01	YML065W	ORC1	essential					0.569	0.386	0.339	0.291	0.335		0.9	0.756	0.729	0.68	0.598		0.186908	-0.0416604	-0.0645366	0.0187183		0.129638	0.0126497	0.0424298	0.0337147		1
379	R06-B-04	YDR166C	SEC5	essential					0.906	0.72	0.678	0.637	0.64		0.973	0.866	0.83	0.741	0.669		0.181416	-0.0259889	-0.00350322	0.0549806		0.0886946	0.00884277	0.0016458	0.0163215		1
380	R01-D-04	YLR141W	RRN5	essential					0.873	0.688	0.651	0.529	0.483		0.972	0.88	0.87	0.776	0.637		0.181175	-0.0212853	-0.102217	-0.117961		0.0728634	0.038587	0.0301635	-0.0430459		1
382	R01-G-09	YPL082C	MOT1	essential					0.519	0.342	0.324	0.28	0.272		0.935	0.768	0.736	0.687	0.61		0.181598	-0.0101363	-0.0296727	-0.0163245		0.153073	0.00775979	0.0384082	0.0377428		1
383	R01-C-07	YDR353W	TRR1	essential					0.89	0.706	0.694	0.623	0.623		0.979	0.969	0.949	0.885	0.785		0.179629	0.00756667	-0.00543744	0.0478696		-0.013993	0.03248	0.0709841	0.0690019		1
384	R05-A-06	YPR143W	RRP15	essential					0.597	0.42	0.368	0.332	0.377		0.909	0.851	0.827	0.79	0.692		0.179561	-0.046304	-0.0511544	0.036935		0.0385033	0.0213582	0.0781456	0.0642111		1
385	R04-F-04	YOR004W	UTP23	essential					0.358	0.187	0.122	0.121	0.166		0.953	0.758	0.504	0.407	0.621		0.179186	-0.0680089	-0.0560501	0.013985		0.18222	-0.240021	-0.297556	0.063634		1
386	R08-A-11	YDL150W	RPC53	essential					0.959	0.775	0.714	0.641	0.66		0.938	0.896	0.856	0.796	0.749		0.177828	-0.0458582	-0.0591799	0.0208663		0.0208624	0.00608352	0.0380026	0.0960296		1
387	R01-B-04	YNL251C	NRD1	essential					0.929	0.748	0.722	0.649	0.64		0.959	0.973	0.937	0.847	0.731		0.175303	-0.00702976	-0.0194859	0.0241096		-0.0388611	0.0148886	0.0197261	-0.0104354		1
388	R01-B-08	YDR190C	RVB1	essential					0.279	0.113	0.104	0.089	0.105		0.882	0.524	0.392	0.292	0.329		0.175736	-0.00680625	-0.0141647	0.0146707		0.356306	-0.117386	-0.192525	-0.0956939		1
389	R01-H-12	YEL032W	MCM3	essential					1.009	0.828	0.953	0.882	0.693		0.969	0.947	0.93	0.832	0.716		0.173214	0.166376	0.181393	0.00619847		-0.00105708	0.0345777	0.0286459	-0.0038426		1
390	R07-D-11	YAL034W-A	MTW1	essential					0.356	0.193	0.145	0.111	0.145		0.87	0.394	0.251	0.164	0.298		0.170418	-0.0485765	-0.0750723	-0.0204817		0.481342	-0.13698	-0.21352	-0.0014487		1
391	R01-C-08	YFR004W	RPN11	essential					0.894	0.72	0.705	0.626	0.633		0.981	0.968	0.945	0.882	0.784		0.168499	0.0045887	-0.0171509	0.0456967		-0.0108719	0.0290827	0.0683283	0.0686662		1
392	R04-G-04	YDL220C	CDC13	essential					0.878	0.709	0.676	0.582	0.65		0.986	0.827	0.783	0.711	0.664		0.163404	-0.016126	-0.0596135	0.0803711		0.143337	-0.00226955	0.00574331	0.0505839		1
393	R04-E-05	YNL232W	CSL4	essential					0.407	0.249	0.181	0.169	0.222		0.975	0.859	0.834	0.782	0.71		0.163574	-0.0695484	-0.064854	0.0198983		0.0981581	0.0206967	0.059788	0.0808241		1
394	R07-F-12	YIL118W	RHO3	essential					0.966	0.796	0.7	0.599	0.57		0.968	0.888	0.82	0.677	0.588		0.162209	-0.0848665	-0.134442	-0.12165		0.0602788	-0.0255489	-0.100818	-0.119748		1
395	R01-D-10	YML105C	SEC65	essential					0.951	0.782	0.764	0.692	0.648		0.963	0.928	0.899	0.814	0.701		0.161498	0.00304914	-0.00362223	-0.00276658		0.0128355	0.0201411	0.0264532	-0.0046494		1
397	R04-C-04	YML023C	NSE5	essential					0.784	0.619	0.533	0.496	0.522		0.979	0.875	0.833	0.765	0.703		0.161449	-0.0788457	-0.0670851	0.00983801		0.0853728	0.00266978	0.021835	0.0541615		1
400	R02-G-04	YLR323C	CWC24	essential					0.93	0.764	0.636	0.53	0.604		0.985	0.961	0.919	0.807	0.737		0.158739	-0.122066	-0.184769	-0.0412764		0.000655631	0.00752906	-0.0170939	0.0106062		1
401	R04-C-02	YIL150C	MCM10	essential					0.804	0.641	0.566	0.519	0.557		1.008	0.788	0.726	0.676	0.642		0.158721	-0.0657289	-0.0628049	0.0320013		0.207267	-0.0245177	0.00365269	0.0611694		1
402	R07-C-04	YPR056W	TFB4	essential					0.248	0.099	0.071	0.078	0.085		0.817	0.298	0.211	0.153	0.229		0.157803	-0.0287433	-0.0123769	0.00358105		0.528127	-0.080044	-0.125654	0.00393093		1
404	R07-E-06	YEL019C	MMS21	essential					0.919	0.756	0.663	0.592	0.641		0.976	0.919	0.875	0.781	0.712		0.155719	-0.0826677	-0.0990258	0.0166155		0.0357652	0.00292875	-0.00487462	0.0201847		1
405	R01-A-10	YBR121C	GRS1	essential					0.604	0.448	0.44	0.331	0.35		0.962	0.903	0.888	0.779	0.681		0.156225	0.00436519	-0.0832661	-0.0297451		0.0382306	0.0343187	0.00956346	-0.00607749		1
406	R03-D-10	YOR244W	ESA1	essential					0.561	0.407	0.358	0.324	0.283		0.972	0.72	0.693	0.612	0.414		0.155143	-0.0432961	-0.046747	-0.0734005		0.241997	0.0106156	-0.00367362	-0.184498		1
407	R07-G-09	YHR023W	MYO1	essential					0.805	0.646	0.624	0.565	0.573		0.95	0.891	0.869	0.766	0.609		0.154285	-0.00555638	-0.0112456	0.0477088		0.0385317	0.0258455	0.00615934	-0.0936711		1
408	R07-F-07	YBR002C	RER2	essential					0.922	0.761	0.721	0.681	0.616		0.936	0.867	0.832	0.728	0.651		0.153435	-0.0224952	0.00588338	-0.0220536		0.0494538	0.0100129	-0.0155004	-0.00980525		1
409	R08-A-02	YMR220W	ERG8	essential					0.936	0.775	0.725	0.654	0.578		0.938	0.847	0.812	0.736	0.665		0.15307	-0.0334007	-0.0430509	-0.087887		0.0726594	0.00888279	0.0155423	0.030835		1
411	R04-B-07	YER147C	SCC4	essential					0.874	0.716	0.627	0.565	0.62		0.971	0.93	0.877	0.798	0.718		0.151381	-0.0793364	-0.0884231	0.0328655		0.0189773	-0.00647198	0.00453708	0.0169133		1
412	R01-A-12	YPL210C	SRP72	essential					0.451	0.304	0.3	0.28	0.275		0.889	0.812	0.79	0.724	0.597		0.150297	0.00457996	0.0122236	0.0295506		0.0590897	0.0213818	0.0376887	-0.0268746		1
413	R02-F-07	YKR071C	DRE2	essential					0.909	0.752	0.671	0.613	0.611		0.976	0.926	0.905	0.828	0.746		0.149365	-0.0691975	-0.068561	-0.0187621		0.0283656	0.0289367	0.0458941	0.0601389		1
414	R07-A-05	YLR116W	MSL5	essential					1.028	0.869	0.801	0.727	0.761		1.01	0.977	0.913	0.788	0.725		0.148463	-0.0509689	-0.0561185	0.0511802		0.00954211	-0.0160658	-0.057522	-0.0230203		1
415	R01-A-02	YDL126C	CDC48	essential					1.001	0.843	0.788	0.722	0.657		0.988	0.945	0.908	0.819	0.715		0.148065	-0.0370255	-0.0336561	-0.0580849		0.0206649	0.0121929	0.0146709	-0.00312119		1
416	R02-G-10	YBR193C	MED8	essential					0.285	0.143	0.12	0.101	0.128		0.853	0.519	0.409	0.321	0.359		0.149119	-0.0217623	-0.0323525	0.0120986		0.331663	-0.0931692	-0.151349	-0.0486258		1
418	R03-F-04	YDL008W	APC11	essential					0.306	0.165	0.135	0.113	0.115		0.873	0.496	0.314	0.22	0.322		0.147468	-0.0290305	-0.0417199	-0.0293985		0.376616	-0.174647	-0.252036	-0.0758449		1
419	R06-H-03	YGR251W	NOP19	essential					0.976	0.821	0.722	0.681	0.702		1.002	0.921	0.879	0.791	0.723		0.14541	-0.0875149	-0.0602688	0.0258526		0.0604828	0.00526893	0.00538746	0.0333908		1
421	R08-F-07	YFL008W	SMC1	essential					0.406	0.264	0.222	0.187	0.23		0.837	0.711	0.608	0.546	0.517		0.14596	-0.0396538	-0.0590595	0.0139703		0.112191	-0.0745255	-0.075843	-0.0315299		1
422	R07-H-08	YPL235W	RVB2	essential					0.959	0.805	0.791	0.646	0.698		0.973	0.941	0.91	0.799	0.721		0.144751	0.00826839	-0.0860525	0.0381881		0.00941338	0.0186484	-0.0058532	0.00946369		1
423	R08-H-01	YAL033W	POP5	essential					0.345	0.205	0.179	0.163	0.161		0.869	0.536	0.405	0.318	0.37		0.145347	-0.0233018	-0.0237866	-0.012492		0.330205	-0.115594	-0.173032	-0.0512759		1
424	R03-A-11	YCR054C	CTR86	essential					1.025	0.874	0.829	0.781	0.737		0.986	0.947	0.913	0.84	0.76		0.139721	-0.0247715	0.00536631	0.0138373		0.0164868	0.0156467	0.0385469	0.0574387		1
427	R01-H-11	YGL201C	MCM6	essential					0.98	0.833	0.914	0.82	0.69		0.965	0.951	0.925	0.831	0.72		0.136485	0.116695	0.0989574	-0.00329299		-0.00941338	0.0247814	0.0231799	-0.0024999		1
428	R05-C-08	YDL092W	SRP14	essential					0.29	0.159	0.117	0.106	0.132		0.896	0.666	0.486	0.434	0.56		0.13686	-0.0428004	-0.0437895	-0.000236884		0.220648	-0.162814	-0.166888	0.0759274		1
429	R06-C-10	YDR228C	PCF11	essential					0.224	0.098	0.089	0.084	0.095		0.786	0.343	0.318	0.229	0.249		0.133071	-0.00725576	-0.00383015	0.0179462		0.448566	-0.00845901	-0.0791634	-0.0157826		1
430	R06-F-06	YDR196C	CAB5	essential					0.92	0.779	0.776	0.744	0.662		0.966	0.972	0.96	0.865	0.769		0.131437	0.0199468	0.0642015	0.0191087		-0.0305801	0.0415582	0.0430604	0.0435465		1
431	R02-F-08	YKL018W	SWD2	essential					0.521	0.389	0.311	0.313	0.294		0.886	0.767	0.745	0.72	0.632		0.131932	-0.0766781	-0.040549	-0.038966		0.103562	0.0188391	0.0803069	0.0694406		1
432	R05-E-05	YPL016W	SWI1	essential					0.906	0.767	0.746	0.658	0.598		1	0.975	0.924	0.817	0.698		0.129597	-0.000797871	-0.0292678	-0.0525415		0.00133635	-0.00170216	-0.0195168	-0.0585105		1
433	R05-B-03	YOL139C	CDC33	essential					0.232	0.108	0.095	0.083	0.097		0.85	0.327	0.239	0.197	0.248		0.130657	-0.0114861	-0.0160962	0.00957334		0.531527	-0.079519	-0.101854	-0.000262062		1
434	R08-A-01	YPL146C	NOP53	essential					0.406	0.279	0.263	0.255	0.269		0.908	0.84	0.816	0.758	0.757		0.129422	-0.00975925	0.00876967	0.0491564		0.0490992	0.0207367	0.0501696	0.166368		1
435	R07-H-10	YLR005W	SSL1	essential					0.193	0.071	0.086	0.08	0.064		0.716	0.198	0.171	0.132	0.161		0.12947	0.0191152	0.0209755	0.00660059		0.529604	-0.0188792	-0.045936	0.0149317		1
436	R08-H-12	YLR275W	SMD2	essential					0.628	0.499	0.397	0.356	0.429		0.856	0.836	0.785	0.733	0.687		0.12583	-0.100562	-0.108478	0.0188001		-0.000335997	-0.00955612	0.0234573	0.0731036		1
437	R04-B-05	YKL125W	RRN3	essential					0.887	0.754	0.677	0.627	0.651		0.975	0.947	0.903	0.821	0.734		0.123478	-0.0646076	-0.0533964	0.0320832		0.00513487	0.00451085	0.015032	0.021227		1
438	R06-A-09	YOR370C	MRS6	essential					0.984	0.85	0.833	0.801	0.728		0.974	0.927	0.885	0.752	0.696		0.122048	0.0062194	0.0566411	0.0283618		0.0252445	0.00560795	-0.0492224	-0.0105561		1
439	R07-H-06	YOR151C	RPB2	essential					0.232	0.116	0.097	0.07	0.094		0.865	0.229	0.185	0.127	0.186		0.121837	-0.0180414	-0.0410455	-0.00322572		0.650601	-0.0360585	-0.0848937	0.016981		1
440	R05-H-10	YPR161C	SGV1	essential					0.875	0.745	0.691	0.595	0.68		0.96	0.924	0.883	0.799	0.715		0.120484	-0.0388297	-0.0831758	0.0804676		0.0139679	0.00655203	0.0121172	0.0190775		1
442	R02-D-09	YGR245C	SDA1	essential					0.225	0.112	0.111	0.098	0.129		0.897	0.375	0.273	0.186	0.36		0.118712	0.0022238	-0.00189592	0.0476035		0.529291	-0.092397	-0.166208	0.104987		1
443	R01-C-01	YJR076C	CDC11	essential					0.875	0.749	0.786	0.673	0.611		0.966	0.907	0.873	0.777	0.656		0.116074	0.0643479	0.00918825	-0.0154545		0.0381302	0.0133866	0.00285988	-0.0451248		1
444	R06-B-06	YJL039C	NUP192	essential					0.879	0.753	0.605	0.499	0.619		1.008	0.944	0.87	0.756	0.731		0.115969	-0.145045	-0.211103	-0.00925457		0.0423618	-0.0290662	-0.0622423	0.02022		1
445	R01-A-03	YMR309C	NIP1	essential					0.48	0.363	0.36	0.323	0.331		0.935	0.862	0.838	0.761	0.68		0.116464	0.00748051	0.00052391	0.0387715		0.0537072	0.0219798	0.0306266	0.0358701		1
446	R07-C-09	YIL063C	YRB2	essential					0.844	0.722	0.69	0.633	0.614		0.946	0.926	0.904	0.783	0.698		0.112473	-0.0146039	-0.0106711	0.0182927		-0.00259416	0.0278232	-0.00979895	-0.0067135		1
447	R05-D-11	YPL242C	IQG1	essential					0.932	0.809	0.743	0.667	0.65		0.969	0.914	0.871	0.771	0.657		0.111278	-0.0505019	-0.0644081	-0.0298825		0.0338266	0.00375982	-0.0119654	-0.0511316		1
448	R01-G-11	YKL014C	URB1	essential					0.756	0.637	0.673	0.6	0.492		0.926	0.918	0.896	0.794	0.678		0.111463	0.0598591	0.0421015	-0.0497954		-0.0147773	0.0273711	0.0122716	-0.026112		1
449	R05-H-07	YDL141W	BPL1	essential					1.002	0.878	0.825	0.775	0.717		0.975	0.855	0.826	0.778	0.693		0.110553	-0.0337116	-0.006488	-0.0170981		0.102386	0.0160163	0.0590658	0.0613756		1
450	R02-C-02	YHR164C	DNA2	essential					0.928	0.807	0.772	0.715	0.661		0.984	0.903	0.862	0.777	0.701		0.109177	-0.0154542	-0.00264964	-0.0130886		0.0609344	0.00536546	0.00708821	0.0217777		1
451	R07-A-03	YOL144W	NOP8	essential					0.406	0.297	0.252	0.195	0.253		0.882	0.813	0.678	0.541	0.69		0.109576	-0.0420624	-0.0855177	0.00809062		0.0508087	-0.104397	-0.189854	0.101595		1
452	R04-E-11	YER126C	NSA2	essential					0.244	0.14	0.128	0.105	0.147		0.91	0.552	0.372	0.278	0.505		0.108293	-0.00939465	-0.0240821	0.0406052		0.355603	-0.169256	-0.23945	0.119833		1
453	R02-H-11	YDR201W	SPC19	essential					0.261	0.158	0.126	0.127	0.18		0.87	0.548	0.343	0.279	0.459		0.106747	-0.0315053	-0.0166324	0.0645261		0.318552	-0.197321	-0.233984	0.0599946		1
454	R06-G-02	YER018C	SPC25	essential					0.354	0.249	0.184	0.167	0.179		0.89	0.739	0.656	0.576	0.477		0.106523	-0.0661509	-0.0673354	-0.0371309		0.137289	-0.0506717	-0.0683126	-0.116839		1
455	R08-E-07	YLR249W	YEF3	essential					0.264	0.161	0.135	0.119	0.164		0.877	0.617	0.527	0.43	0.501		0.106668	-0.0246204	-0.0298656	0.0399984		0.252837	-0.0653602	-0.120042	0.0455517		1
457	R05-C-04	YBL018C	POP8	essential					0.957	0.843	0.733	0.62	0.715		0.96	0.946	0.895	0.822	0.731		0.100702	-0.0993131	-0.160207	0.0188382		-0.00928793	-0.00334076	0.0173267	0.0181058		1
460	R08-C-06	YIL026C	IRR1	essential					0.898	0.787	0.701	0.63	0.661		0.913	0.92	0.878	0.813	0.729		0.0989351	-0.0738112	-0.086058	0.00896212		-0.0303074	0.00521243	0.0336723	0.0428045		1
461	R05-D-06	YLR430W	SEN1	essential					0.917	0.806	0.704	0.6	0.671		0.961	0.915	0.858	0.792	0.702		0.098439	-0.0913619	-0.144227	0.00127654		0.0245136	-0.0117739	0.0129676	0.0104854		1
462	R02-A-07	YDR320C-A	DAD4	essential					0.267	0.172	0.145	0.132	0.157		0.853	0.466	0.313	0.241	0.357		0.0977696	-0.0254233	-0.0258645	0.0185866		0.387689	-0.144048	-0.194333	0.00461406		1
463	R07-E-05	YGR280C	PXR1	essential					0.934	0.825	0.721	0.637	0.7		0.97	0.964	0.921	0.807	0.736		0.0957901	-0.0930575	-0.119269	0.0187899		-0.0179955	0.00658499	-0.0202651	0.00604215		1
465	R02-F-12	YHR088W	RPF1	essential					0.734	0.631	0.6	0.56	0.537		0.964	0.944	0.916	0.824	0.732		0.0943968	-0.0161984	-0.000911028	0.0165015		-0.00304579	0.0221587	0.0219161	0.0216128		1
466	R06-D-04	YNL308C	KRI1	essential					0.365	0.273	0.234	0.164	0.242		0.938	0.89	0.852	0.682	0.713		0.0919033	-0.0359866	-0.0975183	0.0199626		0.0272049	0.00797167	-0.096744	0.0522328		1
467	R01-G-07	YNR016C	ACC1	essential					0.803	0.701	0.765	0.681	0.537		0.953	0.939	0.92	0.825	0.69		0.0914927	0.093487	0.0720355	-0.060676		-0.00911229	0.0318985	0.0284392	-0.0315976		1
468	R06-E-11	YHR070W	TRM5	essential					0.943	0.838	0.788	0.74	0.691		0.98	0.964	0.932	0.822	0.749		0.0911449	-0.0315128	-0.00581088	-0.0074794		-0.00767557	0.0188344	-0.00170075	0.024148		1
469	R02-E-03	YDR211W	GCD6	essential					0.209	0.123	0.117	0.106	0.141		0.91	0.436	0.294	0.215	0.384		0.0893612	-0.00310908	-0.00409826	0.0513907		0.478225	-0.133494	-0.194799	0.073931		1
471	R04-H-06	YOR353C	SOG2	essential					0.94	0.837	0.756	0.685	0.697		1.017	0.962	0.926	0.86	0.788		0.0890182	-0.0666504	-0.0729466	0.00158069		0.0326223	0.0142671	0.0474431	0.0805797		1
472	R08-E-09	YGL245W	GUS1	essential					0.586	0.492	0.484	0.449	0.438		0.927	0.929	0.9	0.815	0.741		0.0883382	0.00568374	0.0146243	0.0384542		-0.0253733	0.0201976	0.0266338	0.0500038		1
473	R08-G-12	YDL165W	CDC36	essential					0.327	0.244	0.197	0.158	0.218		0.923	0.883	0.851	0.747	0.738		0.0829726	-0.0459157	-0.072989	0.0201059		0.0191246	0.0142577	-0.00889886	0.0944513		1
474	R01-D-02	YFL029C	CAK1	essential					0.496	0.409	0.345	0.205	0.266		0.897	0.789	0.731	0.52	0.619		0.0829703	-0.0602237	-0.196595	-0.098152		0.0916585	-0.0200069	-0.190474	0.0280789		1
475	R02-F-01	YML046W	PRP39	essential					0.959	0.861	0.785	0.688	0.681		0.991	0.911	0.865	0.784	0.712		0.0830094	-0.0602686	-0.0956853	-0.0461003		0.0597017	0.000249556	0.00729492	0.0286413		1
476	R04-C-05	YOR372C	NDD1	essential					0.923	0.826	0.754	0.686	0.668		0.993	0.866	0.824	0.739	0.66		0.0828468	-0.0567875	-0.059578	-0.024753		0.109334	0.00216125	-0.000829443	0.00378665		1
477	R03-E-08	YHR107C	CDC12	essential					0.923	0.826	0.772	0.71	0.672		0.96	0.943	0.911	0.809	0.708		0.0828468	-0.0364024	-0.0298013	-0.0194479		-0.00611668	0.0176479	0.00440887	-0.0107563		1
478	R08-F-05	YMR079W	SEC14	essential					0.806	0.713	0.667	0.57	0.515		0.934	0.909	0.87	0.777	0.683		0.0814915	-0.0307287	-0.078912	-0.103084		0.00299234	0.00793165	0.000745714	-0.00963447		1
479	R02-B-01	YER157W	COG3	essential					0.973	0.876	0.832	0.781	0.721		0.978	0.954	0.918	0.814	0.723		0.0815414	-0.023579	0.00316124	-0.00958797		0.000831266	0.0138151	-0.00103092	-0.00149287		1	5
481	R04-G-11	YBR237W	PRP5	essential					0.868	0.774	0.779	0.703	0.642		0.974	0.926	0.895	0.8	0.705		0.0809753	0.028857	0.0188457	-0.00190385		0.0263016	0.0178009	0.0112407	0.0030358		1
482	R11-C-12	YML127W	RSC9	essential					0.379	0.297	0.339	0.326	0.322		0.921	0.869	0.822	0.767	0.699		0.0805124	0.0564653	0.0770134	0.0996026		0.0318597	-0.00323717	0.0306528	0.054933		1
483	R05-B-11	YPL211W	NIP7	essential					0.165	0.135	0.112	0.109	0.125		0.911	0.383	0.25	0.214	0.327		0.028768	-0.022002	-0.0136066	0.0169402		0.535282	-0.126466	-0.140011	0.0505692		1
484	R03-C-06	YLR197W	NOP56	essential					0.154	0.127	0.097	0.092	0.108		0.896	0.401	0.245	0.174	0.344		0.0257476	-0.0301693	-0.0258781	0.00321402		0.500775	-0.151062	-0.208544	0.0552186		1
485	R05-A-09	YOL142W	RRP40	essential					0.124	0.113	0.097	0.091	0.098		0.829	0.361	0.291	0.257	0.29		0.00889031	-0.0147338	-0.0116833	0.00538693		0.473914	-0.0575533	-0.0635375	0.022293		1
486	R04-D-09	YIL021W	RPB3	essential					0.155	0.109	0.087	0.095	0.091		0.786	0.431	0.354	0.306	0.296		0.0466697	-0.0216487	-0.0023104	0.000513249		0.355543	-0.0613932	-0.0768897	-0.0433463		1
487	R05-C-03	YDR404C	RPB7	essential					0.137	0.108	0.094	0.083	0.094		0.758	0.427	0.374	0.301	0.305		0.0283965	-0.0126186	-0.0160962	0.00559457		0.330876	-0.0348931	-0.0788495	-0.0265831		1
488	R06-B-12	YOL005C	RPB11	essential					0.253	0.214	0.177	0.145	0.196		0.871	0.544	0.407	0.258	0.416		0.0363932	-0.0354897	-0.0560419	0.0240043		0.323812	-0.121823	-0.255746	0.00433433		1
489	R05-G-03	YFR051C	RET2	essential					0.178	0.138	0.126	0.104	0.121		0.801	0.519	0.467	0.409	0.389		0.0394539	-0.00945459	-0.0231177	0.00832751		0.278	-0.0285812	-0.0424377	-0.00684306		1
490	R04-F-02	YGR095C	RRP46	essential					0.167	0.128	0.098	0.089	0.111		0.872	0.629	0.398	0.22	0.492		0.0386386	-0.0301393	-0.0307028	0.00609027		0.234992	-0.221698	-0.392628	0.0203319		1
491	R04-F-07	YGR047C	TFC4	essential					0.168	0.157	0.123	0.135	0.131		0.843	0.61	0.453	0.409	0.414		0.00774149	-0.0338003	-0.00560433	0.000641927		0.225149	-0.140366	-0.138632	-0.0682186		1
492	R06-E-03	YPR162C	ORC4	essential					0.281	0.263	0.24	0.229	0.233		0.883	0.677	0.583	0.49	0.555		0.0125089	-0.0181662	-0.00584782	0.0190516		0.195604	-0.0664243	-0.109209	0.0573357		1
493	R03-B-08	YDR145W	TAF12	essential					0.147	0.118	0.094	0.066	0.086		0.815	0.619	0.437	0.264	0.38		0.0281354	-0.023644	-0.0482134	-0.0160409		0.186739	-0.167697	-0.327601	-0.125086		1
494	R04-D-10	YNR054C	ESF2	essential					0.147	0.106	0.071	0.093	0.08		0.806	0.618	0.42	0.293	0.492		0.0413659	-0.0364611	-0.00148418	-0.010768		0.178508	-0.185571	-0.290653	0.0319598		1
495	R05-F-08	YNR046W	TRM112	essential					0.137	0.134	0.123	0.114	0.123		0.854	0.688	0.603	0.522	0.595		-0.000269403	-0.00844195	-0.0063006	0.0153902		0.154048	-0.0557805	-0.0812331	0.101418		1
496	R01-B-05	YML069W	POB3	essential					0.279	0.231	0.192	0.148	0.182		0.877	0.714	0.627	0.425	0.503		0.0456372	-0.0372452	-0.0710629	-0.0133065		0.1503	-0.0565386	-0.228767	-0.0541998		1
497	R06-G-07	YMR117C	SPC24	essential					0.282	0.256	0.187	0.144	0.172		0.865	0.712	0.606	0.499	0.453		0.021303	-0.0704711	-0.103589	-0.0541325		0.14003	-0.0778097	-0.135068	-0.121723		1
498	R04-E-07	YMR043W	MCM1	essential					0.817	0.769	0.708	0.681	0.687		1	0.902	0.861	0.787	0.719		0.0315902	-0.0460381	-0.0029369	0.0632905		0.0785034	0.00530896	0.0205215	0.0479044		1
499	R02-E-07	YPR190C	RPC82	essential					0.24	0.216	0.184	0.152	0.188		0.915	0.824	0.737	0.558	0.696		0.0201946	-0.0297672	-0.0495621	0.0111891		0.0732365	-0.0503232	-0.180442	0.0983234		1
500	R07-D-03	YIR011C	STS1	essential					0.505	0.424	0.311	0.25	0.25		0.895	0.809	0.754	0.59	0.55		0.0761201	-0.115267	-0.157301	-0.13591		0.0684529	-0.0155361	-0.124982	-0.089163		1
501	R06-C-01	YBR253W	SRB6	essential					0.436	0.357	0.326	0.287	0.292		0.876	0.811	0.783	0.695	0.624		0.0757166	-0.0244094	-0.0375259	-0.00633739		0.0467309	0.0146438	0.00285465	0.0117869
502	R06-B-05	YGL092W	NUP145	essential					0.856	0.773	0.749	0.689	0.652		0.974	0.918	0.883	0.778	0.702		0.0691607	-0.00401558	0.00257851	0.0124613		0.0347583	0.0128945	-0.0075304	0.00731419
503	R03-G-05	YER003C	PMI40	essential					0.947	0.867	0.817	0.679	0.628		0.99	0.934	0.889	0.793	0.693		0.0634771	-0.0306438	-0.113467	-0.123007		0.0343568	0.00266272	-0.00587937	-0.022134
504	R08-H-05	YDR292C	SRP101	essential					0.829	0.739	0.694	0.658	0.638		0.995	0.939	0.913	0.843	0.776		0.0775834	-0.028817	0.00160319	0.0313799		0.0342314	0.0241034	0.0507164	0.0881795
505	R06-E-09	YLL036C	PRP19	essential					0.499	0.446	0.403	0.336	0.373		0.961	0.907	0.864	0.706	0.673		0.0454057	-0.0353323	-0.0748575	0.00296398		0.0329703	0.0033643	-0.0850114	-0.0214479
506	R08-G-11	YPR176C	BET2	essential					0.6	0.585	0.441	0.291	0.503		0.887	0.835	0.592	0.354	0.62		0.000872297	-0.14555	-0.283941	0.0221253		0.0327128	-0.223421	-0.444545	-0.0191541
507	R02-E-09	YPL093W	NOG1	essential					0.931	0.858	0.773	0.677	0.666		1.005	0.951	0.914	0.821	0.741		0.0561771	-0.0705511	-0.106025	-0.0626866		0.0318663	0.012532	0.0108037	0.026748
508	R03-D-08	YKL108W	SLD2	essential					0.937	0.92	0.834	0.759	0.721		0.972	0.922	0.889	0.817	0.723		-0.00572156	-0.0698256	-0.0726456	-0.0580995		0.028466	0.0153477	0.0365086	0.0323338
510	R07-D-12	YOR174W	MED4	essential					0.432	0.379	0.353	0.332	0.326		0.858	0.815	0.794	0.698	0.635		0.0471551	-0.0180876	-0.00595041	0.0144997		0.0239267	0.0226649	0.00233919	0.0228789
512	R02-G-07	YGL061C	DUO1	essential					0.893	0.891	0.809	0.692	0.64		0.975	0.93	0.896	0.774	0.689		-0.0211108	-0.0661646	-0.123799	-0.133553		0.0231053	0.0146861	-0.0251659	-0.0234767
513	R05-F-12	YJR042W	NUP85	essential					0.597	0.526	0.479	0.429	0.428		0.911	0.869	0.827	0.767	0.67		0.0626926	-0.037465	-0.0476758	-0.0122946		0.0215398	0.00233076	0.0306528	0.014543
514	R07-E-09	YOR060C	SLD7	essential					0.903	0.86	0.781	0.736	0.721		0.97	0.928	0.889	0.789	0.7		0.0238321	-0.0636961	-0.0350295	0.00805261		0.0200595	0.00900521	-0.00448737	-0.00604215
515	R01-C-02	YPL028W	ERG10	essential					0.805	0.721	0.763	0.654	0.599		0.954	0.913	0.903	0.821	0.705		0.0715948	0.0691713	0.0164861	-0.000498627		0.0194038	0.0404516	0.0509728	0.0167779
516	R04-G-09	YLR127C	APC2	essential					0.863	0.828	0.819	0.685	0.595		0.965	0.932	0.868	0.753	0.687		0.0160562	0.0146201	-0.0630237	-0.123775		0.0106712	-0.0186084	-0.0532702	-0.0283763
517	R03-H-05	YJL125C	GCD14	essential					1.035	0.956	0.9	0.826	0.791		1.013	0.979	0.934	0.864	0.776		0.0600769	-0.0347717	-0.0292104	-0.00495264		0.0105239	0.00520537	0.0344232	0.0458962
518	R01-F-08	YKL152C	GPM1	essential					0.855	0.785	0.783	0.735	0.594		0.946	0.914	0.887	0.786	0.675		0.0548538	0.0212591	0.04642	-0.0776922		0.0100908	0.0215772	0.00659892	-0.0260619
519	R04-A-04	YHR074W	QNS1	essential					0.986	0.936	0.917	0.849	0.802		0.992	0.959	0.926	0.838	0.758		0.0293828	0.00653156	0.0213763	0.0316869		0.00999374	0.0174383	0.0233866	0.0419682
520	R04-E-10	YDL111C	RRP42	essential					0.171	0.139	0.121	0.124	0.122		0.849	0.821	0.8	0.744	0.644		0.0308164	-0.0162196	0.000593673	0.00855123		0.0082963	0.0230039	0.0529274	0.0290712
521	R05-G-10	YLR277C	YSH1	essential					0.888	0.834	0.737	0.605	0.651		0.98	0.949	0.911	0.824	0.712		0.0363516	-0.0848603	-0.168895	-0.0561197		0.00818066	0.0113054	0.0166307	-0.0115278
523	R06-H-11	YGR030C	POP6	essential					0.988	0.927	0.859	0.751	0.788		0.961	0.931	0.897	0.787	0.729		0.0414584	-0.0492308	-0.0902889	0.0230421		0.0076003	0.0147427	-0.0101339	0.0311766
524	R04-B-08	YPL020C	ULP1	essential					0.877	0.839	0.8	0.731	0.709		0.974	0.945	0.906	0.827	0.742		0.0189983	-0.0190253	-0.0180797	0.0152907		0.00621704	0.00996577	0.0245719	0.0344833
525	R06-H-06	YER112W	LSM4	essential					0.627	0.586	0.555	0.565	0.519		0.951	0.923	0.889	0.796	0.724		0.0288333	-0.0175469	0.0549066	0.0422429		0.00573705	0.0142906	0.00946141	0.0326694
526	R09-A-01	YER008C	SEC3	essential					1.024	0.998	0.906	0.879	0.834		0.988	0.961	0.91	0.85	0.711		0.00192973	-0.0742832	-0.00976004	0.00577004		0.00375161	-0.00249321	0.036124	-0.0256055
527	R03-E-11	YKL189W	HYM1	essential					0.988	0.906	0.863	0.773	0.713		0.992	0.965	0.932	0.848	0.778		0.0646117	-0.0215475	-0.0398404	-0.0532741		0.00365124	0.0177773	0.0294204	0.0634809
528	R07-H-07	YJL076W	NET1	essential					0.962	0.913	0.882	0.775	0.727		0.979	0.953	0.905	0.786	0.702		0.0289069	-0.00774772	-0.0450768	-0.0424242		0.00292034	0.000395523	-0.0346273	-0.0296837
529	R02-E-06	YLR002C	NOC3	essential					0.906	0.912	0.823	0.73	0.634		0.979	0.953	0.921	0.82	0.741		-0.0302705	-0.0734628	-0.0998055	-0.164664		0.00292034	0.0182129	0.00745191	0.0246338
530	R02-C-09	YBR079C	RPG1	essential					0.434	0.416	0.425	0.372	0.262		0.921	0.897	0.847	0.701	0.615		0.00851409	0.0226588	0.00288356	-0.111175		0.00226144	-0.00499583	-0.0806287	-0.091657
531	R05-E-12	YMR218C	TRS130	essential					1.003	0.976	0.917	0.836	0.733		0.976	0.951	0.906	0.817	0.679		0.00358057	-0.0375699	-0.0388541	-0.103926		0.00193853	0.00362327	0.0058532	-0.059603
532	R04-D-11	YNL312W	RFA2	essential					0.724	0.681	0.623	0.622	0.6		0.961	0.937	0.913	0.831	0.738		0.0285057	-0.0452776	0.0208853	0.0449291		0.00125781	0.0262175	0.0379791	0.0373689
533	R01-B-11	YPR108W	RPN7	essential					0.392	0.325	0.338	0.29	0.325		0.878	0.856	0.821	0.738	0.67		0.063635	0.0244618	0.00147734	0.0727103		0.00122617	0.00939132	0.00850376	0.0282851
534	R01-A-07	YIL078W	THS1	essential					0.848	0.799	0.77	0.671	0.575		0.97	0.946	0.921	0.833	0.695		0.0318833	-0.00889895	-0.0484199	-0.118327		0.00103199	0.0256125	0.0309406	-0.0320334
535	R04-G-07	YNR011C	PRP2	essential					0.798	0.714	0.744	0.663	0.633		0.995	0.971	0.939	0.829	0.709		0.0717776	0.0553715	0.0353701	0.052312		0.000404724	0.01923	-0.000436962	-0.0389619
536	R03-G-02	YNL062C	GCD10	essential					0.949	0.875	0.843	0.736	0.728		0.999	0.975	0.938	0.845	0.76		0.0568097	-0.010019	-0.0515675	0.000798388		0.000304361	0.013888	0.0151367	0.0278404
537	R02-H-12	YFR003C	YPI1	essential					0.898	0.95	0.909	0.831	0.788		0.966	0.943	0.924	0.82	0.737		-0.0807783	-0.017964	-0.0163917	-0.0023162		7.52721e-05	0.0321245	0.0180227	0.0296336
538	R01-C-11	YER038C	KRE29	essential					0.895	0.822	0.768	0.7	0.67		0.97	0.947	0.916	0.828	0.716		0.0571171	-0.0365223	-0.0377981	-0.0176903		-2.50907e-05	0.0189875	0.0236954	-0.0038426
539	R09-A-05	YLR099W-A	MIM2	essential					1.015	0.99	0.933	0.865	0.808		0.978	0.955	0.93	0.836	0.702		0.00106218	-0.0348853	-0.0183095	-0.0198924		-0.000225816	0.026121	0.0251397	-0.0317979
540	R01-H-03	YGR116W	SPT6	essential					0.55	0.537	0.534	0.468	0.48		0.961	0.939	0.891	0.747	0.634		-2.72964e-05	0.0126948	-0.0114166	0.044543		-0.000856357	-0.000395523	-0.0680955	-0.109592
541	R01-F-07	YDR050C	TPI1	essential					0.621	0.58	0.588	0.609	0.492		0.95	0.929	0.88	0.781	0.67		0.0289899	0.0264409	0.116112	0.0130491		-0.00163744	-0.00207414	-0.0154454	-0.048882
542	R09-A-04	YER148W	SPT15	essential					0.984	0.954	0.874	0.815	0.752		0.955	0.934	0.892	0.803	0.677		0.00738426	-0.0620117	-0.0406529	-0.0544717		-0.00176289	0.00600347	0.00649687	-0.0444181
543	R05-G-07	YBR198C	TAF5	essential					0.889	0.891	0.861	0.732	0.691		0.957	0.936	0.886	0.794	0.695		-0.0254165	-0.00727449	-0.0741708	-0.0659138		-0.00181308	-0.0027922	-0.00675591	-0.0214626
545	R02-H-03	YJR012C		essential					0.909	0.965	0.9	0.785	0.763		0.971	0.95	0.916	0.816	0.76		-0.0854756	-0.0446945	-0.0900017	-0.0520107		-0.00216435	0.0158162	0.00567266	0.0542675
546	R02-A-06	YOR159C	SME1	essential					0.952	0.891	0.873	0.721	0.718		0.979	0.958	0.913	0.775	0.72		0.0423984	0.00631555	-0.0878185	-0.0301048		-0.00236507	0.0040188	-0.0535266	-0.00989947
547	R04-F-12	YMR288W	HSH155	essential					0.347	0.326	0.249	0.206	0.274		0.898	0.879	0.796	0.678	0.664		0.0140932	-0.0774335	-0.103844	0.00396854		-0.00244689	-0.0427612	-0.0900666	-0.00438439
548	R01-A-05	YOR361C	PRT1	essential					0.476	0.422	0.457	0.417	0.356		0.983	0.962	0.939	0.849	0.732		0.0471088	0.0522837	0.0520996	0.00687842		-0.00246543	0.0287437	0.0338293	0.00258529
734	R08-H-07	YGR120C	COG2	essential					0.963	0.994	0.941	0.849	0.77		0.935	0.946	0.906	0.814	0.73		-0.0593221	-0.0302355	-0.0425707	-0.0747005		-0.0350877	0.00890869	0.00742574	0.0167131			5
550	R04-D-07	YDR044W	HEM13	essential					0.888	0.902	0.833	0.766	0.708		0.986	0.965	0.906	0.781	0.69		-0.0386208	-0.0511125	-0.0441151	-0.0554953		-0.00254071	-0.0111759	-0.0535004	-0.0590818
551	R04-A-11	YDR362C	TFC6	essential					0.974	0.91	0.868	0.812	0.785		0.975	0.955	0.921	0.834	0.76		0.0451316	-0.0202951	0.00413656	0.0378065		-0.00332179	0.0160987	0.0226645	0.0489821
553	R04-H-11	YDR499W	LCD1	essential					0.967	0.904	0.861	0.792	0.756		0.983	0.963	0.926	0.833	0.747		0.0442118	-0.0216075	-0.0140621	0.00596013		-0.00352252	0.01321	0.0129702	0.0224196
554	R06-A-08	YER136W	GDI1	essential					0.65	0.687	0.702	0.624	0.603		0.901	0.883	0.853	0.733	0.691		-0.057765	0.0375749	0.0167514	0.0422926		-0.00357924	0.0164848	-0.0262256	0.0289917
555	R05-A-02	YGR158C	MTR3	essential					0.705	0.667	0.657	0.6	0.544		0.959	0.94	0.912	0.835	0.723		0.0234891	0.00866296	0.00902547	-0.013906		-0.00397742	0.0219327	0.0397583	0.0133063
556	R06-B-11	YDR510W	SMT3	essential					0.877	0.884	0.877	0.805	0.739		0.961	0.942	0.907	0.778	0.72		-0.0306158	0.0185633	0.0241176	0.00546442		-0.0040276	0.0142506	-0.0329004	0.00701385
557	R06-E-06	YML114C	TAF8	essential					0.733	0.714	0.696	0.631	0.602		0.968	0.949	0.918	0.807	0.723		0.00180987	0.00101139	-0.00433217	0.0111979		-0.00420324	0.0191005	-0.00440887	0.00379254
558	R06-F-05	YGR075C	PRP38	essential					0.408	0.41	0.362	0.311	0.371		0.929	0.911	0.872	0.776	0.702		-0.0128578	-0.0420737	-0.0661836	0.0400027		-0.00428178	0.00804466	-0.00260607	0.0147138
559	R02-A-08	YHR143W-A	RPC10	essential					1.017	0.998	0.971	0.885	0.822		0.99	0.971	0.944	0.825	0.747		-0.00560525	-0.000670512	-0.00231587	-0.0101451		-0.00475523	0.0247979	-0.00538746	0.0139629
560	R02-H-02	YER104W	RTT105	essential					0.729	0.794	0.741	0.674	0.583		0.955	0.937	0.911	0.816	0.716		-0.0906987	-0.0362289	-0.0391852	-0.102204		-0.00493414	0.0239904	0.0194147	0.00672823
561	R06-E-12	YMR033W	ARP9	essential					0.909	0.898	0.877	0.788	0.719		0.959	0.941	0.901	0.777	0.718		-0.0116057	0.00312781	-0.0124097	-0.0364963		-0.00503451	0.00862617	-0.0330809	0.00528541
562	R03-A-09	YPR137W	RRP9	essential					0.945	0.899	0.864	0.774	0.675		0.968	0.95	0.914	0.801	0.722		0.0260431	-0.0126973	-0.0308819	-0.0959542		-0.00526032	0.013589	-0.0128917	0.0013427
563	R07-B-07	YDL235C	YPD1	essential					0.924	0.895	0.867	0.774	0.694		0.983	0.965	0.934	0.82	0.721		0.0078483	-0.00488962	-0.0264718	-0.0663452		-0.00563668	0.0200045	-0.00523308	-0.0159063
564	R02-G-01	YKR004C	ECM9	essential					0.98	0.984	0.966	0.878	0.771		0.996	0.978	0.947	0.828	0.747		-0.0299975	0.00910248	0.00443477	-0.0623488		-0.00596286	0.0207391	-0.00907416	0.00656333
565	R02-E-11	YDR390C	UBA2	essential					0.929	0.925	0.893	0.803	0.744		0.998	0.98	0.948	0.838	0.755		-0.0198456	-0.00852062	-0.0235677	-0.0331082		-0.00601304	0.0197385	0.00118791	0.0155912
568	R09-A-02	YJL167W	ERG20	essential					1.002	0.997	0.902	0.872	0.826		0.97	0.953	0.9	0.838	0.708		-0.0206491	-0.0777107	-0.0173424	-0.00373751		-0.00636759	-0.00517241	0.0297291	-0.0213272
571	R04-F-06	YIL031W	ULP2	essential					0.859	0.882	0.807	0.805	0.746		0.989	0.972	0.94	0.851	0.758		-0.0477864	-0.0585068	0.0263227	0.0169533		-0.00684431	0.0192865	0.0257337	0.0282262
574	R04-G-12	YNL126W	SPC98	essential					0.939	0.897	0.894	0.822	0.758		0.968	0.952	0.925	0.829	0.747		0.0217896	0.0234829	0.0308765	0.0163304		-0.00737449	0.0237243	0.0196476	0.0340475
576	R08-B-01	YGL048C	RPT6	essential					0.946	0.991	0.948	0.858	0.773		0.944	0.929	0.891	0.799	0.714		-0.0743138	-0.0190003	-0.0280969	-0.0674141		-0.00782939	0.0101753	0.00683179	0.0123994
577	R05-F-09	YLR438C-A	LSM3	essential					0.89	0.879	0.818	0.751	0.681		0.997	0.981	0.951	0.872	0.756		-0.0111096	-0.0427417	-0.0373672	-0.065946		-0.00810212	0.0220222	0.04221	0.0159269
578	R01-E-07	YPR048W	TAH18	essential					0.968	0.916	0.914	0.831	0.732		1.001	0.985	0.967	0.896	0.79		0.0320578	0.0251848	0.0210945	-0.0391005		-0.00820248	0.0356112	0.0676847	0.0590523
580	R07-G-12	YOR341W	RPA190	essential					0.938	0.897	0.818	0.755	0.725		0.971	0.956	0.902	0.768	0.692		0.0207132	-0.0625873	-0.0522501	-0.0274362		-0.00850684	-0.00611648	-0.0600758	-0.0467825
582	R06-A-12	YGL022W	STT3	essential					0.86	0.867	0.863	0.817	0.761		0.931	0.917	0.887	0.773	0.707		-0.030172	0.0214514	0.0577491	0.0533853		-0.0085603	0.0184059	-0.0126614	0.0153351
585	R03-A-01	YNL061W	NOP2	essential					1.036	1.019	0.975	0.912	0.84		1.005	0.99	0.951	0.856	0.769		-0.0083064	-0.0192938	0.00802963	-0.00942566		-0.00935993	0.0125084	0.0128943	0.024519
586	R05-F-05	YOR224C	RPB8	essential					0.827	0.801	0.76	0.709	0.673		0.964	0.95	0.925	0.842	0.726		0.00707332	-0.0224291	-0.0034786	0.00944174		-0.00938829	0.0258385	0.0378509	0.00691373
588	R04-D-03	YNR035C	ARC35	essential					0.825	0.776	0.779	0.686	0.61		0.985	0.971	0.926	0.824	0.717		0.0324839	0.0266519	-0.00445118	-0.0465492		-0.00991519	0.00475334	-0.00662508	-0.0278198
590	R02-H-10	YOR148C	SPP2	essential					0.75	0.859	0.756	0.73	0.703		1.029	1.014	0.975	0.863	0.793		-0.139759	-0.0909061	-0.0413711	-0.0147175		-0.0099621	0.0138645	-0.0038123	0.0325752
591	R02-E-05	YJL010C	NOP9	essential					0.917	0.97	0.9	0.797	0.722		0.991	0.977	0.949	0.841	0.75		-0.0823769	-0.0502072	-0.080626	-0.1119		-0.0100657	0.0240233	0.00807203	0.0117987
592	R06-F-11	YHR122W	CIA2	essential					0.932	0.896	0.868	0.806	0.741		0.951	0.938	0.898	0.779	0.721		0.0153572	-0.00485965	0.0121279	-0.00511349		-0.0101192	0.00845666	-0.0274344	0.0126349
593	R04-F-11	YOL021C	DIS3	essential					0.785	0.844	0.812	0.746	0.701		0.952	0.939	0.916	0.847	0.755		-0.0855456	-0.0109479	-0.00498193	-0.00083202		-0.0101443	0.0274441	0.0556669	0.0589316
594	R08-H-02	YML098W	TAF13	essential					0.919	0.961	0.894	0.807	0.708		0.953	0.94	0.899	0.805	0.719		-0.0703012	-0.0470794	-0.0582962	-0.120545		-0.0101694	0.00745608	0.00262962	0.00773525
595	R02-G-02	YLR132C	USB1	essential					0.927	0.942	0.87	0.816	0.743		0.997	0.983	0.958	0.841	0.755		-0.0407416	-0.0533113	-0.0261818	-0.0531776		-0.0102163	0.0277031	0.00172953	0.01242
596	R06-F-09	YDR412W	RRP17	essential					0.937	0.958	0.93	0.856	0.773		0.969	0.956	0.916	0.803	0.732		-0.0476179	-0.00300169	0.00580541	-0.0310304		-0.0105708	0.00947372	-0.0167589	0.00892778
597	R07-A-08	YKL024C	URA6	essential					0.916	0.915	0.886	0.747	0.764		0.971	0.958	0.927	0.809	0.733		-0.0228138	-0.00542278	-0.0820213	0.00444231		-0.010621	0.019609	-0.0114474	0.00820638
601	R02-C-01	YHR186C	KOG1	essential					0.978	0.961	0.939	0.87	0.725		0.998	0.985	0.95	0.829	0.741		-0.00679205	0.00388322	0.0198675	-0.0979985		-0.0112985	0.0166802	-0.0152361	-0.00919279
603	R02-H-05	YDR478W	SNM1	essential					0.991	1.016	0.957	0.906	0.834		1.009	0.996	0.96	0.853	0.777		-0.053438	-0.0363712	0.00389307	-0.0140756		-0.0115745	0.0161882	0.00283895	0.0293186
604	R03-G-01	YOR046C	DBP5	essential					1.035	1.016	0.981	0.896	0.817		1.01	0.997	0.96	0.856	0.773		-0.00607522	-0.00919113	-0.00851387	-0.036622		-0.0115995	0.0151311	0.00549474	0.0226905
607	R05-A-08	YPR016C	TIF6	essential					1.015	1	0.968	0.896	0.803		0.973	0.961	0.929	0.849	0.727		-0.00996317	-0.00627309	0.0091267	-0.0375491		-0.0117283	0.0186649	0.0348863	-0.00332142
608	R03-A-02	YER036C	ARB1	essential					1.011	0.997	0.955	0.862	0.782		0.978	0.966	0.929	0.827	0.752		-0.0109613	-0.017688	-0.0297493	-0.0620929		-0.0118537	0.0133795	0.0023732	0.0262121
609	R05-F-01	YOL034W	SMC5	essential					1.011	0.985	0.952	0.874	0.781		0.979	0.967	0.932	0.841	0.734		0.00226916	-0.0078551	-0.00163055	-0.0501888		-0.0118788	0.0156632	0.0186429	8.53911e-05
612	R03-E-09	YGR005C	TFG2	essential					1.005	0.958	0.943	0.845	0.772		0.991	0.979	0.945	0.845	0.759		0.0255791	0.0117208	-0.00784223	-0.0323566		-0.0121799	0.0174548	0.0109084	0.0222193
614	R06-H-08	YDR397C	NCB2	essential					1.001	0.907	0.826	0.72	0.716		0.997	0.985	0.946	0.855	0.773		0.0775027	-0.0645527	-0.1067	-0.0503979		-0.0123304	0.0122259	0.0169421	0.0353755
616	R03-E-04	YGR156W	PTI1	essential					0.867	0.812	0.765	0.725	0.669		0.974	0.963	0.929	0.841	0.753		0.0380025	-0.0288944	0.00424463	-0.00799119		-0.0128104	0.0165508	0.0228712	0.0307761
617	R04-G-03	YDR081C	PDC2	essential					0.948	0.932	0.916	0.857	0.805		0.975	0.964	0.94	0.855	0.764		-0.0071113	0.0098092	0.035712	0.0400759		-0.0128355	0.0277431	0.0391408	0.0450394
619	R06-H-05	YJR017C	ESS1	essential					0.983	0.941	0.88	0.847	0.784		0.983	0.972	0.939	0.84	0.767		0.0206408	-0.0408837	0.0133823	0.00230158		-0.0130363	0.0181729	0.0121198	0.040761
621	R06-D-05	YOL066C	RIB2	essential					0.949	0.86	0.836	0.777	0.744		0.952	0.942	0.933	0.844	0.764		0.0733477	-0.00140845	0.015839	0.0385566		-0.0133155	0.0432038	0.0487828	0.0682952
622	R03-E-07	YOL022C	TSR4	essential					1.003	0.964	0.91	0.828	0.755		0.997	0.986	0.948	0.842	0.761		0.016811	-0.032267	-0.0355493	-0.0615183		-0.0133875	0.013396	-0.00020409	0.0176053
623	R03-A-03	YDR341C	RRS1	essential					0.702	0.626	0.576	0.512	0.527		0.958	0.948	0.908	0.826	0.753		0.0654638	-0.0378658	-0.0549517	0.00875156		-0.0134661	0.00902169	0.0201631	0.0466324
624	R06-A-06	YDR376W	ARH1	essential					0.99	0.99	0.954	0.875	0.816		0.962	0.952	0.914	0.798	0.725		-0.0258485	-0.0111028	-0.00590253	-0.00928236		-0.0135664	0.0114749	-0.0187187	0.00340681
625	R03-D-02	YPR034W	ARP7	essential					0.921	0.947	0.903	0.808	0.77		1.011	1	0.958	0.855	0.774		-0.0527128	-0.0214514	-0.04162	-0.0228813		-0.0137388	0.00973269	0.00108586	0.020912
626	R08-G-09	YMR061W	RNA14	essential					0.535	0.543	0.44	0.282	0.494		0.972	0.962	0.882	0.645	0.748		-0.0227889	-0.100376	-0.248801	0.0564955		-0.0138173	-0.0347307	-0.218646	0.0248694
627	R04-D-12	YDR280W	RRP45	essential					0.965	0.935	0.898	0.842	0.792		0.975	0.965	0.93	0.837	0.757		0.00788034	-0.0138835	0.013794	0.0195269		-0.0138926	0.0155502	0.0158065	0.034233
628	R02-F-03	YKR008W	RSC4	essential					0.897	0.874	0.809	0.631	0.597		0.977	0.967	0.92	0.798	0.705		0.00193804	-0.0474215	-0.180738	-0.171839		-0.0139428	0.00230015	-0.034575	-0.0403046
629	R08-A-08	YPR186C	PZF1	essential					0.949	0.876	0.813	0.718	0.742		0.937	0.928	0.896	0.812	0.744		0.0557071	-0.0450966	-0.0750025	0.0182635		-0.0139963	0.0168003	0.023978	0.0552392
630	R05-B-12	YPR187W	RPO26	essential					1.018	1.006	0.965	0.876	0.778		0.987	0.977	0.939	0.844	0.723		-0.0133491	-0.0162858	-0.0223024	-0.0773208		-0.0141937	0.0128875	0.0117849	-0.0258058
632	R04-H-03	YNL216W	RAP1	essential					0.952	0.928	0.919	0.849	0.774		0.993	0.983	0.951	0.856	0.763		0.00160455	0.0176168	0.0301966	0.00337195		-0.0143442	0.019908	0.0202939	0.023562
634	R03-A-05	YGR246C	BRF1	essential					1.023	1.014	0.975	0.881	0.798		1.005	0.995	0.953	0.859	0.781		-0.0167873	-0.0137811	-0.0249192	-0.0596159		-0.0146453	0.00945018	0.0113218	0.0359467
635	R07-C-11	YFL034C-B	MOB2	essential					0.869	0.859	0.84	0.782	0.733		0.966	0.957	0.924	0.805	0.712		-0.0116639	0.0042241	0.023145	0.0250703		-0.0147239	0.0173253	-0.0153408	-0.0199845
636	R06-G-12	YLL050C	COF1	essential					0.856	0.878	0.848	0.775	0.653		0.926	0.918	0.898	0.768	0.682		-0.0466056	-0.00766406	-0.006488	-0.101979		-0.0147773	0.0295983	-0.0199066	-0.020541
638	R04-G-08	YAL041W	CDC24	essential					0.606	0.61	0.651	0.587	0.573		0.894	0.887	0.865	0.78	0.686		-0.0202325	0.0647125	0.055741	0.0874001		-0.0150315	0.0256195	0.0277144	0.0177996
639	R05-E-11	YGR094W	VAS1	essential					0.973	0.961	0.952	0.845	0.781		0.981	0.972	0.94	0.844	0.734		-0.0121742	0.0186058	-0.0111498	-0.0237279		-0.0151002	0.0192865	0.0170703	-0.00520002
640	R03-E-10	YJL026W	RNR2	essential					0.979	0.989	0.915	0.819	0.756		0.987	0.978	0.943	0.838	0.757		-0.0365866	-0.0541678	-0.0742789	-0.0877554		-0.0152508	0.0162847	0.00330207	0.0204909
641	R06-G-04	YNL110C	NOP15	essential					0.937	0.928	0.875	0.809	0.739		0.952	0.944	0.91	0.805	0.723		-0.0145418	-0.0322133	-0.0194312	-0.0430472		-0.0154297	0.0154772	-0.00159871	0.00907795
643	R07-E-11	YGR267C	FOL2	essential					0.328	0.325	0.328	0.332	0.31		0.831	0.826	0.814	0.73	0.627		-0.00525633	0.0131368	0.0535865	0.0528164		-0.015565	0.0333087	0.0303152	0.000108947
644	R03-A-06	YLR060W	FRS1	essential					0.967	0.956	0.915	0.82	0.744		0.958	0.95	0.9	0.793	0.724		-0.0131201	-0.0177842	-0.0366545	-0.0672869		-0.0155802	-0.00200116	-0.0227927	0.00412822
646	R06-G-10	YDR167W	TAF10	essential					0.843	0.908	0.838	0.76	0.68		0.973	0.965	0.93	0.803	0.724		-0.0936752	-0.0520652	-0.0581745	-0.0992458		-0.0159566	0.0155502	-0.0262727	-0.011728
647	R02-C-03	YNL132W	KRE33	essential					0.943	0.931	0.931	0.823	0.741		0.974	0.966	0.936	0.818	0.737		-0.0113909	0.0278993	-0.00536905	-0.0437022		-0.0159817	0.0211746	-0.00876541	0.00532075
648	R05-C-05	YMR236W	TAF9	essential					0.987	0.954	0.907	0.817	0.745		0.975	0.967	0.931	0.85	0.721		0.0106135	-0.0246391	-0.0381715	-0.0637555		-0.0160068	0.0145496	0.0297815	-0.0180205
649	R02-C-05	YDL028C	MPS1	essential					0.924	0.845	0.85	0.744	0.636		0.984	0.976	0.952	0.845	0.74		0.0629751	0.0309846	-0.00856586	-0.0881415		-0.0162326	0.0284212	0.0140796	-0.00107181
652	R01-F-09	YNL178W	RPS3	essential					0.878	0.876	0.888	0.834	0.707		0.976	0.969	0.945	0.834	0.742		-0.0207191	0.0398411	0.0689181	-0.0281556		-0.017089	0.0280256	0.00786532	0.00911329
653	R05-F-10	YOR210W	RPB10	essential					0.976	0.974	0.936	0.835	0.77		0.977	0.97	0.939	0.854	0.734		-0.0232779	-0.0138473	-0.0378898	-0.0526497		-0.017114	0.020287	0.0315607	-0.00308586
654	R04-A-12	YNL103W	MET4	essential					0.886	0.938	0.897	0.888	0.84		1.022	1.014	0.974	0.869	0.798		-0.0804649	-0.0183236	0.0675584	0.0798797		-0.017186	0.0127509	0.00361344	0.039539
655	R08-B-12	YER127W	LCP5	essential					0.906	0.93	0.895	0.803	0.735		0.907	0.902	0.866	0.801	0.731		-0.0501161	-0.0117683	-0.0290804	-0.0505573		-0.0174719	0.0108769	0.0378483	0.0646175
656	R01-F-10	YMR260C	TIF11	essential					0.79	0.745	0.778	0.76	0.563		0.953	0.947	0.928	0.835	0.672		0.0289876	0.059698	0.121539	-0.0747048		-0.017569	0.0323505	0.0323588	-0.0651239
657	R05-D-07	YPL085W	SEC16	essential					0.864	0.775	0.74	0.658	0.608		0.955	0.949	0.919	0.824	0.708		0.075567	-0.0164132	-0.0380881	-0.0480992		-0.0176191	0.0202141	0.0166307	-0.0170988
658	R03-H-09	YBL074C	AAR2	essential					1.017	1.02	0.979	0.893	0.812		1.002	0.995	0.955	0.856	0.772		-0.029861	-0.0158663	-0.0166461	-0.0476635		-0.0177413	0.0116773	0.0076089	0.0234119
659	R04-G-02	YPR104C	FHL1	essential					0.833	0.813	0.812	0.712	0.674		1.011	1.004	0.976	0.908	0.816		0.000301447	0.0232307	-0.0129869	-0.00246243		-0.0179671	0.0255489	0.0624516	0.0751795
662	R03-C-03	YPR169W	JIP5	essential					0.922	0.944	0.901	0.834	0.753		0.979	0.973	0.937	0.831	0.747		-0.0483288	-0.0204088	-0.00605437	-0.0421201		-0.0182213	0.0148886	-7.58797e-05	0.0118487
665	R04-F-10	YOR048C	RAT1	essential					0.828	0.832	0.809	0.771	0.676		0.99	0.984	0.959	0.897	0.802		-0.0260289	-0.00111502	0.0392659	-0.0207581		-0.0184973	0.0277596	0.0699794	0.0768225
666	R04-D-06	YDR267C	CIA1	essential					0.867	0.909	0.873	0.826	0.759		0.994	0.988	0.954	0.859	0.772		-0.0689435	-0.0135301	0.0226088	0.00442623		-0.0185977	0.0179633	0.0187213	0.0308115
667	R04-E-01	YJR007W	SUI2	essential					0.951	0.951	0.911	0.87	0.795		0.995	0.989	0.955	0.866	0.771		-0.0248302	-0.0168015	0.0308929	0.00586508		-0.0186228	0.0180198	0.0263276	0.0283616
668	R03-H-12	YNL007C	SIS1	essential					0.993	0.965	0.924	0.839	0.76		0.957	0.952	0.904	0.804	0.727		0.0049442	-0.0175145	-0.0230042	-0.0559895		-0.0187264	0.00033902	-0.011293	0.00619232
669	R06-H-04	YDL064W	UBC9	essential					0.976	0.987	0.963	0.895	0.801		0.957	0.952	0.925	0.828	0.731		-0.0376108	0.00239736	0.022219	-0.0258686		-0.0187264	0.0237243	0.01841	0.0117634
670	R08-G-04	YDL145C	COP1	essential					0.702	0.644	0.564	0.474	0.497		0.919	0.915	0.869	0.787	0.715		0.0456182	-0.0713015	-0.121944	-0.0508819		-0.01883	0.000475569	0.00677946	0.0285913
671	R05-C-06	YBR135W	CKS1	essential					0.974	0.953	0.893	0.809	0.723		0.963	0.958	0.923	0.84	0.713		-0.00227747	-0.0393916	-0.0469946	-0.0918307		-0.0188769	0.0151547	0.026919	-0.0196488
673	R06-F-10	YOR077W	RTS2	essential					0.385	0.402	0.402	0.394	0.375		0.928	0.924	0.901	0.774	0.699		-0.0287953	0.0120467	0.0456143	0.0541281		-0.0190558	0.0265966	-0.0188234	-0.00320658
674	R02-E-01	YKL104C	GFA1	essential					0.458	0.411	0.406	0.49	0.511		0.937	0.933	0.938	0.908	0.802		0.039861	0.00665392	0.154798	0.224577		-0.0192817	0.0582855	0.137504	0.130734
675	R01-C-03	YNR043W	MVD1	essential					0.619	0.573	0.659	0.643	0.665		0.988	0.983	0.975	0.878	0.772		0.0345548	0.114566	0.166014	0.25021		-0.0195042	0.0466341	0.0475216	0.0360969
676	R06-C-02	YKL058W	TOA2	essential					0.93	0.957	0.927	0.847	0.764		0.958	0.954	0.916	0.799	0.724		-0.0540504	-0.00529667	-0.00425831	-0.0418642		-0.0198086	0.0115879	-0.0195953	-0.000100114
677	R07-G-10	YDR141C	DOP1	essential					0.843	0.77	0.707	0.707	0.762		0.961	0.957	0.939	0.855	0.782		0.0584748	-0.0482731	0.0282186	0.161657		-0.0198838	0.0340291	0.0465404	0.0775086
678	R03-F-10	YGL097W	SRM1	essential					0.961	0.947	0.884	0.793	0.739		0.965	0.961	0.925	0.824	0.736		-0.00965579	-0.0429689	-0.0602305	-0.0639953		-0.0199842	0.0142106	0.00394574	0.0092134
680	R04-C-12	YKR081C	RPF2	essential					0.956	0.931	0.902	0.821	0.778		0.971	0.967	0.93	0.834	0.757		0.00260265	-0.00494331	-0.00785044	0.00536938		-0.0201347	0.013436	0.00997949	0.0321188
681	R08-A-06	YOR110W	TFC7	essential					0.939	0.944	0.921	0.835	0.785		0.932	0.929	0.896	0.803	0.744		-0.0300296	0.00224128	-0.00481368	0.000320233		-0.0202133	0.0157432	0.0117823	0.0541821
682	R03-E-12	YOR057W	SGT1	essential					1.007	0.998	0.958	0.873	0.794		0.977	0.973	0.933	0.839	0.757		-0.0163695	-0.015393	-0.0172042	-0.0472804		-0.0202853	0.0104343	0.00982511	0.0257763
683	R03-F-01	YOR063W	RPL3	essential					1.014	0.992	0.965	0.867	0.792		0.984	0.98	0.941	0.84	0.752		-0.00221931	-0.000850314	-0.0180332	-0.0433177		-0.0204609	0.0119434	0.00366316	0.011413
684	R01-D-06	YDL045C	FAD1	essential					0.981	0.978	0.953	0.824	0.724		0.99	0.986	0.957	0.854	0.738		-0.0223059	0.000995154	-0.0559475	-0.118068		-0.0206115	0.0234183	0.0146474	-0.0144281
685	R06-F-03	YJL081C	ARP4	essential					0.938	0.945	0.907	0.839	0.756		0.95	0.947	0.908	0.797	0.72		-0.0322085	-0.0147163	-0.000953434	-0.0392438		-0.0206649	0.0100788	-0.0146709	0.00172843
686	R06-D-12	YPL228W	CET1	essential					0.967	0.984	0.949	0.874	0.813		0.952	0.949	0.913	0.78	0.724		-0.0439911	-0.0101501	-0.000528013	-0.00664592		-0.0207151	0.0135325	-0.0378247	0.0051853
687	R01-B-09	YDL084W	SUB2	essential					0.954	0.921	0.902	0.81	0.719		0.96	0.957	0.932	0.841	0.726		0.0114752	0.00608205	-0.0104727	-0.0618546		-0.0209158	0.026234	0.0292137	-0.000485846
688	R04-H-04	YDL132W	CDC53	essential					0.755	0.769	0.776	0.718	0.678		0.964	0.961	0.92	0.807	0.711		-0.0351482	0.0309721	0.0429688	0.0513542		-0.0210162	0.00864265	-0.0170939	-0.0256055
691	R03-D-04	YKL145W	RPT1	essential					0.935	0.979	0.917	0.814	0.759		0.976	0.973	0.932	0.832	0.752		-0.072924	-0.0408775	-0.069457	-0.0727513		-0.0213173	0.00932069	0.00116174	0.0188125
693	R05-G-09	YAL043C	PTA1	essential					0.973	0.998	0.959	0.834	0.783		0.981	0.978	0.939	0.845	0.738		-0.052968	-0.0142605	-0.0655913	-0.0618692		-0.0214427	0.0118304	0.0119654	-0.00597149
694	R08-H-03	YDR170C	SEC7	essential					0.951	0.94	0.874	0.799	0.737		0.943	0.941	0.907	0.817	0.741		-0.0127023	-0.0465762	-0.0450685	-0.0589301		-0.0215464	0.0153077	0.016424	0.0373188
695	R03-F-06	YER133W	GLC7	essential					1.002	0.974	0.919	0.821	0.728		0.987	0.984	0.942	0.812	0.754		0.00470922	-0.0330998	-0.0552595	-0.108353		-0.0215933	0.00882864	-0.0352186	0.00997014
697	R08-F-02	YGL030W	RPL30	essential					0.756	0.777	0.745	0.668	0.644		0.908	0.907	0.873	0.788	0.725		-0.0428921	-0.0129557	-0.0278862	-0.00255894		-0.0217253	0.0133866	0.0164737	0.0509755
698	R01-H-06	YPL012W	RRP12	essential					0.938	0.908	0.895	0.801	0.666		0.959	0.957	0.93	0.841	0.713		0.0085853	0.0124875	-0.00730601	-0.117813		-0.0219478	0.0240068	0.0292137	-0.0185917
700	R03-F-08	YML085C	TUB1	essential					0.937	0.935	0.875	0.791	0.747		0.968	0.966	0.924	0.83	0.755		-0.0222596	-0.039931	-0.0494814	-0.0401548		-0.0221736	0.00781158	0.00608607	0.0303904
703	R05-F-06	YER159C	BUR6	essential					0.891	0.83	0.804	0.699	0.666		1.009	1.007	0.983	0.921	0.808		0.0439911	-0.00457246	-0.0478591	-0.0318156		-0.0232024	0.0301728	0.0753695	0.0608662
706	R02-F-02	YFL002C	SPB4	essential					0.829	0.836	0.811	0.656	0.63		0.982	0.981	0.947	0.806	0.695		-0.0293626	-0.00326016	-0.107824	-0.0861762		-0.023582	0.0175678	-0.0394731	-0.0690313
707	R05-G-12	YLR274W	MCM5	essential					0.959	0.958	0.92	0.798	0.74		0.941	0.941	0.908	0.818	0.707		-0.0239365	-0.0143267	-0.0661549	-0.074797		-0.0236104	0.0164213	0.0176616	-0.0100349
708	R03-G-08	YBR143C	SUP45	essential					0.801	0.863	0.832	0.706	0.571		0.946	0.946	0.912	0.81	0.692		-0.089271	-0.00924607	-0.0755579	-0.194194		-0.0237358	0.0155902	0.00247525	-0.0362117
709	R01-D-05	YLR100W	ERG27	essential					0.984	0.965	0.962	0.827	0.761		0.997	0.996	0.978	0.914	0.803		-0.00474363	0.0255206	-0.0378925	-0.0546633		-0.0239584	0.0362327	0.078334	0.0655303
710	R05-D-03	YLR106C	MDN1	essential					0.968	0.943	0.91	0.817	0.735		0.972	0.972	0.934	0.839	0.722		0.00228933	-0.00911371	-0.0260436	-0.0648902		-0.0243882	0.0126049	0.0108822	-0.0219131
711	R08-H-04	YGL238W	CSE1	essential					0.96	0.993	0.945	0.858	0.795		0.944	0.945	0.91	0.823	0.747		-0.0614489	-0.0246029	-0.030302	-0.0404414		-0.0247427	0.0144201	0.0196214	0.0414471
712	R02-H-01	YKL144C	RPC25	essential					1.018	1.015	0.987	0.912	0.84		0.995	0.995	0.967	0.85	0.77		-0.0232719	-0.00129358	0.0124398	-0.00501551		-0.0249653	0.0250404	0.000183158	0.0206264
713	R08-H-09	YDL164C	CDC9	essential					0.924	0.962	0.9	0.813	0.757		0.958	0.959	0.926	0.83	0.751		-0.0660216	-0.0413869	-0.0519546	-0.0566607		-0.025094	0.0174383	0.0134857	0.0322189
714	R08-G-01	YDL205C	HEM3	essential					1.002	1.033	0.993	0.911	0.854		0.976	0.977	0.947	0.848	0.776		-0.0603404	-0.0143442	-0.00864656	-0.00629352		-0.0255456	0.0217961	0.0167354	0.0480104
715	R04-B-03	YIL046W	MET30	essential					0.89	0.917	0.883	0.827	0.766		0.978	0.979	0.939	0.849	0.756		-0.053006	-0.0110254	0.0150292	0.00488976		-0.0255958	0.0107733	0.0158589	0.0180411
716	R03-B-12	YDL143W	CCT4	essential					0.912	0.876	0.877	0.748	0.621		0.981	0.982	0.939	0.821	0.698		0.0158794	0.0273836	-0.0377817	-0.142214		-0.0256711	0.00760205	-0.0219659	-0.0659101
718	R06-D-10	YKL088W	CAB3	essential					0.913	0.941	0.937	0.84	0.795		0.962	0.964	0.923	0.786	0.738		-0.054709	0.0236689	0.0046974	0.0168904		-0.0262514	0.00881216	-0.0462552	0.00882767
719	R08-D-06	YOR217W	RFC1	essential					0.901	0.912	0.848	0.774	0.727		0.922	0.925	0.896	0.829	0.744		-0.0356526	-0.0451503	-0.0452149	-0.0413217		-0.0263049	0.0199716	0.0481888	0.0584104
721	R06-D-03	YPL169C	MEX67	essential					0.93	0.876	0.882	0.789	0.714		0.958	0.961	0.918	0.79	0.706		0.035255	0.0330461	0.0130868	-0.0188718		-0.0272081	0.00641548	-0.0381335	-0.0325693
722	R06-H-10	YKL122C	SRP21	essential					0.983	1.007	0.979	0.897	0.826		0.974	0.977	0.95	0.823	0.751		-0.0521266	-0.00153331	0.00264964	-0.0147629		-0.0276096	0.0251369	-0.0142052	0.0131914
723	R06-E-02	YNL189W	SRP1	essential					0.66	0.722	0.74	0.717	0.675		0.946	0.95	0.921	0.808	0.739		-0.0855895	0.0420212	0.0935473	0.0991946		-0.0279641	0.0213841	-0.00422833	0.0250196
724	R07-D-01	YOL094C	RFC4	essential					1.016	1.025	0.973	0.889	0.829		0.989	0.992	0.954	0.837	0.75		-0.0364501	-0.028174	-0.0271216	-0.0306297		-0.027986	0.013735	-0.0127347	-0.00405755
725	R08-A-09	YMR113W	FOL3	essential					0.966	0.992	0.969	0.884	0.818		0.943	0.948	0.922	0.829	0.75		-0.0538878	0.0036797	0.00305865	-0.00883491		-0.028946	0.0246119	0.0238759	0.0424541
726	R04-H-02	YFL024C	EPL1	essential					0.984	0.948	0.937	0.864	0.785		0.99	0.994	0.953	0.86	0.763		0.0139995	0.0159512	0.0267563	-0.00408991		-0.0290681	0.0105073	0.0136165	0.0119341
727	R07-B-06	YDR454C	GUK1	essential					0.683	0.715	0.704	0.648	0.652		0.943	0.949	0.923	0.802	0.714		-0.053114	0.00896887	0.0156571	0.0764084		-0.030003	0.0246684	-0.010597	-0.00874228
728	R03-B-07	YPR033C	HTS1	essential					0.641	0.671	0.639	0.571	0.542		0.959	0.965	0.932	0.84	0.745		-0.0498123	-0.0161322	-0.0313648	-0.0209687		-0.0304045	0.0177773	0.0195194	0.0175199
731	R08-F-09	YGR218W	CRM1	essential					0.979	1.007	0.959	0.871	0.807		0.948	0.956	0.916	0.817	0.743		-0.0564323	-0.0241834	-0.0296084	-0.0399618		-0.0322427	0.00947372	0.000567789	0.0242481
733	R03-B-02	YBR196C	PGI1	essential					0.893	0.919	0.85	0.763	0.672		0.959	0.969	0.946	0.843	0.738		-0.0519818	-0.050603	-0.0665803	-0.121984		-0.0346328	0.0291392	0.0190039	0.00354226
737	R01-E-04	YIR006C	PAN1	essential					0.945	0.866	0.838	0.742	0.618		0.994	1.005	0.952	0.829	0.683		0.0624268	-0.00575866	-0.0342005	-0.135167		-0.0365681	-0.00223423	-0.0363778	-0.111114
740	R08-B-04	YGR185C	TYS1	essential					0.863	0.895	0.869	0.789	0.725		0.953	0.968	0.95	0.85	0.763		-0.0578137	-0.00262461	-0.00786138	-0.0252311		-0.0397677	0.0346506	0.0287244	0.0394183
741	R07-D-10	YBR152W	SPP381	essential					0.921	0.949	0.919	0.834	0.77		0.956	0.972	0.934	0.805	0.718		-0.0549179	-0.0055364	-0.0115671	-0.0250863		-0.0409	0.0126049	-0.031197	-0.0274841
742	R08-E-02	YPL153C	RAD53	essential					0.93	0.934	0.9	0.809	0.776		0.935	0.952	0.917	0.829	0.764		-0.028692	-0.0105159	-0.0260464	-0.000590749		-0.0414302	0.0148156	0.0196476	0.0577244
743	R08-B-09	YHR040W	BCD1	essential					0.925	0.931	0.887	0.808	0.801		0.918	0.939	0.91	0.828	0.758		-0.0307666	-0.0219308	-0.0239795	0.0358734		-0.045232	0.0207626	0.0321521	0.0631099
744	R07-D-05	YCL059C	KRR1	essential					0.942	0.978	0.932	0.846	0.777		0.964	0.984	0.947	0.82	0.733		-0.0642865	-0.0227874	-0.0286523	-0.0477761		-0.0453291	0.0143966	-0.0253176	-0.0192778
745	R08-B-06	YDR088C	SLU7	essential					0.907	0.935	0.915	0.814	0.77		0.946	0.968	0.932	0.835	0.751		-0.0545524	0.00536909	-0.0209454	-0.00965084		-0.0469916	0.0146061	0.01016	0.0227052
746	R08-D-11	YLL034C	RIX7	essential					0.899	0.925	0.898	0.818	0.76		0.921	0.945	0.909	0.822	0.752		-0.0521384	-0.0028581	-0.00495731	-0.0118881		-0.0484785	0.0133065	0.0183838	0.0484108
748	R08-E-05	YMR049C	ERB1	essential					0.927	0.96	0.926	0.835	0.782		0.933	0.959	0.926	0.835	0.763		-0.0605873	-0.00973678	-0.0224543	-0.0212991		-0.0508938	0.0174383	0.0196738	0.048932
750	R07-D-04	YOR143C	THI80	essential					0.446	0.492	0.465	0.424	0.403		0.92	0.952	0.872	0.695	0.597		-0.0623615	-0.0158338	-0.016393	-0.00796487		-0.0569101	-0.0352957	-0.146194	-0.174866
751	R08-E-08	YLR347C	KAP95	essential					0.622	0.676	0.661	0.619	0.595		0.92	0.953	0.932	0.873	0.797		-0.0757771	0.00327015	0.0226759	0.0438104		-0.0579672	0.0304623	0.073046	0.102628
752	R07-D-08	YCL031C	RRP7	essential					0.764	0.837	0.8	0.724	0.631		0.925	0.958	0.942	0.808	0.69		-0.100433	-0.0168202	-0.0245595	-0.0859525		-0.0580926	0.0363128	-0.012685	-0.0516822
753	R08-C-07	YLR223C	IFH1	essential					0.28	0.306	0.295	0.251	0.268		0.903	0.938	0.857	0.688	0.614		-0.0359766	-0.00328763	-0.0259616	0.0180617		-0.0596548	-0.0372004	-0.140058	-0.13639
549	R05-A-01	YJL001W	PRE3	essential					1.026	1.003	0.975	0.899	0.816		0.985	0.964	0.931	0.85	0.732		-0.00143009	-0.00165318	0.00954118	-0.0236153		-0.00251562	0.0177208	0.0329527	0.000471123			7
567	R01-F-05	YOR362C	PRE10	essential					0.373	0.362	0.367	0.377	0.341		0.97	0.953	0.945	0.874	0.753		0.00238903	0.0165106	0.068624	0.0531367		-0.00636759	0.044939	0.0742836	0.0413469			7
575	R04-F-03	YOL038W	PRE6	essential					0.397	0.482	0.361	0.377	0.406		0.982	0.966	0.917	0.85	0.775		-0.104081	-0.122589	-0.0636803	0.00703927		-0.00772576	1.64801e-05	0.0308385	0.0582455			7
589	R05-A-03	YGL011C	SCL1	essential					1.026	1.012	0.972	0.877	0.809		0.985	0.971	0.924	0.847	0.753		-0.0113529	-0.0149735	-0.0276769	-0.042822		-0.00991519	0.00252617	0.0218403	0.0223195			7
602	R05-A-05	YML092C	PRE8	essential					0.816	0.806	0.784	0.723	0.675		1	0.987	0.967	0.91	0.791		-0.01028	-0.000761661	0.00837845	0.00658158		-0.0113486	0.033497	0.0828972	0.0583309			7
610	R05-A-10	YMR314W	PRE5	essential					0.488	0.486	0.461	0.434	0.423		0.943	0.932	0.919	0.857	0.738		-0.0105364	-0.0137486	0.00262912	0.0251755		-0.0120326	0.0381845	0.0754427	0.0426543			7
672	R05-B-06	YER012W	PRE1	essential					0.969	0.952	0.903	0.828	0.752		0.969	0.964	0.922	0.832	0.721		-0.00655706	-0.0269641	-0.0223188	-0.0522666		-0.0190275	0.00769857	0.0106755	-0.0148492			7
704	R04-E-12	YGR253C	PUP2	essential					0.143	0.145	0.145	0.142	0.15		0.841	0.843	0.807	0.772	0.767		-0.00593874	0.00434521	0.016311	0.0390713		-0.0232155	0.00754319	0.064325	0.177125			7
730	R08-G-03	YFR050C	PRE4	essential					0.903	0.926	0.892	0.82	0.768		0.957	0.964	0.927	0.844	0.771		-0.0489353	-0.0107557	-0.00357845	-0.00238054		-0.0314114	0.0132665	0.025527	0.0547887			7
738	R08-G-02	YPR103W	PRE2	essential					0.898	0.908	0.878	0.81	0.761		0.961	0.973	0.942	0.863	0.789		-0.0344718	-0.00676505	0.00386024	0.00818128		-0.0367972	0.0204565	0.0395281	0.0703446			7
754	R08-G-08	YBL023C	MCM2	essential					0.923	0.884	0.664	0.436	0.721		0.926	0.895	0.746	0.572	0.707		0.0188998	-0.22266	-0.433699	-0.0184083		0.00953556	-0.115354	-0.238168	0.0385909			6
755	R06-D-07	YOR260W	GCD1	essential					0.901	0.819	0.58	0.345	0.582		0.953	0.937	0.828	0.661	0.704		0.0668832	-0.246125	-0.474937	-0.131094		-0.00699813	-0.0684373	-0.172417	-0.00998487			6
756	R02-D-10	YNL247W		essential					0.868	0.722	0.496	0.254	0.501		0.972	0.928	0.841	0.467	0.718		0.138307	-0.234309	-0.480894	-0.131575		0.0221235	-0.0444469	-0.403002	0.0190275		1	6
757	R08-G-10	YML127W	RSC9	essential					0.934	0.97	0.856	0.476	0.769		0.94	0.958	0.886	0.67	0.752		-0.0640776	-0.100037	-0.478889	-0.0495659		-0.0426128	-0.026048	-0.183477	0.0346688			6
758	R08-F-11	YFR037C	RSC8	essential					0.777	0.661	0.336	0.159	0.574		0.929	0.865	0.588	0.284	0.72		0.107607	-0.348255	-0.531506	0.032497		0.044344	-0.259588	-0.562891	0.0884092		1	6
759	R11-F-06	YBL007C	SLA1	non-essential					0.118	0.308	0.399	0.192	0.201		0.956	0.92	0.789	0.662	0.587		-0.212563	0.112288	-0.101368	-0.0730028		0.0140683	-0.0938967	-0.153209	-0.154967
760	R10-B-07	YIL035C	CKA1	non-essential					0.512	0.59	0.623	0.617	0.554		0.752	0.83	0.816	0.764	0.682		-0.0993659	0.0550531	0.115013	0.0842519		-0.101321	0.0313075	0.0681661	0.0724823
761	R09-C-05	YJR059W	PTK2	non-essential					0.821	0.875	0.79	0.721	0.721		1.037	1.019	0.983	0.886	0.787		-0.0809729	-0.0700416	-0.0701779	-0.00848543		-0.00699158	0.0174878	0.0193676	0.0189333
762	R08-A-07	YDL090C	RAM1	non-essential					0.974	1.022	0.993	0.906	0.861		0.94	0.966	0.939	0.844	0.784		-0.0783524	-0.00221631	-0.00272214	0.0151182		-0.0510694	0.0245154	0.0234128	0.0707804
763	R06-G-03	YNL036W	NCE103	non-essential					0.937	0.971	0.929	0.846	0.766		0.955	0.953	0.917	0.806	0.724		-0.0619509	-0.0184672	-0.0209345	-0.0546472		-0.0218475	0.0137586	-0.00987482	0.000956969
764	R09-C-03	YNL041C	COG6	non-essential					0.867	0.9	0.807	0.751	0.715		0.984	0.967	0.921	0.813	0.683		-0.0590207	-0.0783525	-0.0605205	-0.0440064		-0.00671886	0.00341374	-0.0160106	-0.0709452			5
765	R09-E-05	YBR010W	HHT1	non-essential					0.653	0.687	0.653	0.626	0.609		0.959	0.956	0.924	0.842	0.702		-0.0545358	-0.0179178	0.0192328	0.0502502		-0.0208907	0.0183824	0.0315084	-0.0328549
766	R10-F-10	YMR123W	PKR1	non-essential					0.857	0.886	0.879	0.786	0.752		0.947	0.931	0.883	0.788	0.722		-0.0543494	0.0186232	-0.00166064	0.0205007		-0.00684758	-0.000847549	-0.00889624	0.0214273
767	R10-B-06	YJR148W	BAT2	non-essential					0.901	0.927	0.906	0.842	0.68		0.952	0.923	0.899	0.829	0.733		-0.0521907	0.00399685	0.0226143	-0.120194		0.00676904	0.0254265	0.050303	0.0452043
768	R10-E-07	YPL038W	MET31	non-essential					0.926	0.948	0.922	0.834	0.781		0.972	0.956	0.915	0.821	0.745		-0.0484332	-0.00103636	-0.0104645	-0.00939495		-0.00747485	0.00836013	0.00551828	0.0270336
769	R10-E-08	YKR020W	VPS51	non-essential					0.908	0.929	0.891	0.824	0.761		0.964	0.941	0.902	0.816	0.734		-0.0468607	-0.0151958	-0.00192328	-0.014972		0.000125454	0.00973976	0.0151864	0.0275695
770	R10-F-08	YIL138C	TPM2	non-essential					0.924	0.944	0.92	0.833	0.779		0.949	0.931	0.889	0.793	0.724		-0.046176	0.00110878	-0.00729507	-0.00763733		-0.0047836	0.00583397	-0.00270812	0.0242128
771	R09-F-06	YLR450W	HMG2	non-essential					0.854	0.875	0.82	0.761	0.726		0.998	0.979	0.945	0.842	0.71		-0.0454508	-0.0360665	-0.0205501	-0.00185413		-0.00495596	0.0174548	0.00719549	-0.0460258
772	R10-B-02	YLR113W	HOG1	non-essential					0.577	0.604	0.597	0.513	0.509		0.929	0.933	0.88	0.724	0.646		-0.0448337	0.0101725	-0.0294552	0.00913467		-0.0275376	-0.00630247	-0.0902183	-0.0865365
773	R09-B-08	YBL047C	EDE1	non-essential					0.94	0.955	0.891	0.806	0.794		0.965	0.954	0.922	0.822	0.705		-0.041081	-0.0438617	-0.0529217	0.000128678		-0.0125846	0.0182694	0.00887007	-0.0265625
774	R09-G-09	YHR080C		non-essential					0.931	0.946	0.889	0.81	0.802		1.002	0.984	0.949	0.857	0.735		-0.040846	-0.0362039	-0.0380361	0.0206616		-0.00611341	0.0166237	0.0204744	-0.0164923
775	R09-G-03	YPL232W	SSO1	non-essential					0.922	0.937	0.845	0.789	0.731		0.972	0.961	0.891	0.821	0.693		-0.0406111	-0.0761112	-0.0541679	-0.0635801		-0.0127603	-0.0236513	0.000232872	-0.0506752
776	R10-E-06	YDR059C	UBC5	non-essential					0.912	0.927	0.905	0.824	0.759		0.975	0.958	0.914	0.822	0.746		-0.04035	0.00286435	0.00028179	-0.0154194		-0.00649304	0.00513238	0.00464174	0.0263122
777	R10-E-09	YMR159C	ATG16	non-essential					0.885	0.9	0.86	0.796	0.744		0.975	0.951	0.913	0.82	0.731		-0.039645	-0.0183298	-0.0046892	-0.00554485		0.000906538	0.0114184	0.00956607	0.0128204
778	R10-H-04	YBR028C	YPK3	non-essential					0.963	0.976	0.939	0.84	0.787		0.957	0.941	0.91	0.814	0.732		-0.0394765	-0.0126548	-0.0338913	-0.0323084		-0.00709849	0.0186484	0.0127112	0.024784
779	R09-C-02	YGL049C	TIF4632	non-essential					0.941	0.953	0.883	0.806	0.775		0.967	0.951	0.907	0.827	0.699		-0.0377995	-0.0507166	-0.0507166	-0.0228652		-0.0073494	0.00473686	0.0182294	-0.0317478
780	R10-H-09	YPL026C	SKS1	non-essential					1.012	1.022	0.977	0.894	0.853		0.987	0.981	0.955	0.864	0.782		-0.0374482	-0.0203364	-0.0176105	0.00450811		-0.018422	0.0264765	0.032309	0.0521386
781	R10-G-10	YNL020C	ARK1	non-essential					0.958	0.969	0.934	0.848	0.799		0.982	0.962	0.924	0.817	0.745		-0.0371409	-0.0105996	-0.016248	-0.00867552		-0.00349743	0.0120399	-0.00577471	0.0206911
782	R09-D-05	YKL081W	TEF4	non-essential					0.95	0.961	0.909	0.822	0.779		0.972	0.953	0.924	0.827	0.707		-0.036932	-0.0300919	-0.0396858	-0.0263804		-0.0043036	0.0215537	0.0161153	-0.0227199
783	R09-C-09	YNL154C	YCK2	non-essential					0.932	0.943	0.872	0.812	0.8		0.978	0.961	0.932	0.863	0.736		-0.036462	-0.0521488	-0.0322471	0.0213167		-0.00656831	0.0220057	0.0522131	0.0092134
784	R10-A-11	YER081W	SER3	non-essential					0.922	0.933	0.932	0.855	0.803		0.976	0.96	0.913	0.827	0.752		-0.0362009	0.0268267	0.0321281	0.0363208		-0.00757521	0.00190463	0.0087157	0.0325546
785	R12-B-03	YIL065C	FIS1	non-essential					0.878	0.89	0.843	0.775	0.704		0.978	0.911	0.87	0.797	0.716		-0.0361546	-0.026557	-0.0197184	-0.0475699		0.0462858	0.00581748	0.023384	0.0342124
786	R09-H-04	YDR253C	MET32	non-essential					0.991	1	0.913	0.842	0.806		0.991	0.979	0.913	0.854	0.733		-0.0357974	-0.0685607	-0.0578708	-0.0335703		-0.0121799	-0.0181799	0.022047	-0.0139924
787	R10-E-04	YPL166W	ATG29	non-essential					0.913	0.923	0.899	0.82	0.759		0.958	0.937	0.893	0.805	0.731		-0.0348634	0.000479472	-0.000270846	-0.0110093		-0.00183817	0.00394581	0.00580087	0.0276196
788	R10-F-06	YBR082C	UBC4	non-essential					0.49	0.51	0.491	0.448	0.457		0.945	0.942	0.885	0.749	0.659		-0.0348444	-0.00623438	-0.00646201	0.0438075		-0.0205395	-0.0102483	-0.0687915	-0.0779444
789	R09-C-07	YKR001C	VPS1	non-essential					0.53	0.549	0.492	0.45	0.427		0.863	0.849	0.811	0.741	0.604		-0.0347863	-0.0481008	-0.0469795	-0.0389792		-0.00685413	0.00565504	0.0196162	-0.0562374
790	R11-G-02	YER114C	BOI2	non-essential					0.638	0.654	0.613	0.533	0.52		0.982	0.953	0.857	0.734	0.659		-0.0342985	-0.0268342	-0.0597681	-0.0314033		0.00601632	-0.0530566	-0.0989837	-0.0895723
791	R10-H-06	YDL101C	DUN1	non-essential					0.983	0.99	0.957	0.866	0.811		0.962	0.956	0.924	0.823	0.745		-0.0333835	-0.00770526	-0.0170688	-0.0159137		-0.0177948	0.0183824	0.00799353	0.0270336
792	R10-B-09	YGR040W	KSS1	non-essential					0.912	0.92	0.908	0.829	0.763		0.956	0.945	0.912	0.814	0.728		-0.0326322	0.0139796	0.014203	-0.00239663		-0.0123588	0.0166473	0.00848283	0.0149847
793	R10-D-07	YOL065C	INP54	non-essential					0.907	0.914	0.908	0.828	0.766		0.958	0.941	0.91	0.815	0.733		-0.0313991	0.0205948	0.0195775	0.00819737		-0.0060665	0.0186484	0.0139488	0.0261768
794	R10-E-11	YBR097W	VPS15	non-essential					0.86	0.868	0.843	0.755	0.647		1.008	0.996	0.95	0.852	0.756		-0.0312745	-0.00230122	-0.0202765	-0.0989109		-0.0126064	0.00505234	0.00160132	7.06685e-05
795	R09-E-06	YBL002W	HTB2	non-essential					0.701	0.712	0.699	0.727	0.735		0.989	0.983	0.957	0.879	0.754		-0.0304307	0.00661397	0.11698	0.189796		-0.0184722	0.0265895	0.0487592	0.0110272
796	R10-E-10	YJR066W	TOR1	non-essential					0.944	0.949	0.902	0.841	0.792		0.972	0.955	0.917	0.824	0.747		-0.0301601	-0.024789	-0.00288219	0.00409137		-0.00641777	0.0116444	0.0102882	0.0308762
797	R09-C-04	YHR205W	SCH9	non-essential					0.398	0.416	0.363	0.34	0.353		0.972	0.918	0.825	0.65	0.472		-0.0302373	-0.0475564	-0.0368187	0.00951485		0.0326943	-0.0516935	-0.165946	-0.31302
798	R10-C-12	YLR431C	ATG23	non-essential					0.929	0.934	0.934	0.848	0.776		0.997	0.974	0.932	0.826	0.74		-0.0297685	0.0279892	0.0223407	-0.000590749		-0.00070254	0.00826361	-0.00732108	0.00104236
799	R10-G-09	YNL047C	SLM2	non-essential					0.954	0.958	0.938	0.852	0.796		0.974	0.957	0.923	0.825	0.745		-0.0293187	0.00605833	0.000842633	-0.00052641		-0.00646795	0.0162117	0.0094117	0.0259765
800	R09-C-11	YDR385W	EFT2	non-essential					0.928	0.932	0.844	0.806	0.781		0.965	0.949	0.9	0.816	0.698		-0.0286398	-0.071731	-0.0275634	0.00824562		-0.00729921	-0.000944076	0.00672974	-0.0310264
801	R11-E-10	YJR138W	IML1	non-essential					0.933	0.936	0.916	0.858	0.794		0.975	0.977	0.912	0.814	0.743		-0.0276678	0.00539905	0.0325426	0.0210769		-0.0265776	-0.0171794	-0.0253438	0.00204939
802	R10-D-01	YPR106W	ISR1	non-essential					0.774	0.78	0.784	0.746	0.678		0.943	0.927	0.904	0.819	0.719		-0.026824	0.0279043	0.0655804	0.0392263		-0.00674722	0.0267661	0.0336984	0.0214773
803	R10-G-11	YNL299W	TRF5	non-essential					0.931	0.933	0.877	0.789	0.753		0.949	0.926	0.893	0.794	0.721		-0.0265131	-0.0354609	-0.0497577	-0.0299922		0.000501814	0.0155737	0.00381492	0.0253199
804	R10-E-02	YOR220W	RCN2	non-essential					0.96	0.961	0.932	0.839	0.777		0.965	0.948	0.902	0.8	0.721		-0.0261677	-0.0040443	-0.018594	-0.029033		-0.00624213	0.00234018	-0.0120152	0.00206411
805	R10-D-09	YGR052W	FMP48	non-essential					0.917	0.919	0.916	0.832	0.765		0.955	0.938	0.91	0.813	0.73		-0.0261475	0.0241422	0.0190276	0.00135843		-0.00599122	0.0218197	0.0146448	0.0251698
806	R11-H-03	YOR226C	ISU2	non-essential					1.022	1.021	0.965	0.876	0.811		0.977	0.971	0.916	0.819	0.74		-0.0255814	-0.0328239	-0.0388404	-0.0500923		-0.0181711	-0.00638252	-0.0128132	0.00421361
807	R11-G-01	YER129W	SAK1	non-essential					1.022	1.021	0.965	0.867	0.798		0.985	0.977	0.926	0.824	0.75		-0.0255814	-0.0328239	-0.0500067	-0.0673336		-0.0162577	-0.00158916	-0.0129676	0.0117987
808	R10-C-10	YPR080W	TEF1	non-essential					0.849	0.852	0.841	0.781	0.745		0.964	0.954	0.92	0.834	0.744		-0.0254746	0.0130744	0.0296221	0.0487031		-0.0136166	0.0160422	0.0237216	0.027755
809	R11-E-12	YJL095W	BCK1	non-essential					0.972	0.972	0.986	0.909	0.852		1.002	0.99	0.934	0.869	0.796		-0.0253785	0.044983	0.0561267	0.0583086		-0.0124559	-0.00642254	0.0289834	0.0621235
810	R10-C-04	YDR098C	GRX3	non-essential					0.916	0.917	0.89	0.821	0.767		0.952	0.939	0.899	0.807	0.728		-0.0250189	-0.00309784	0.00758506	0.00621602		-0.0101443	0.00851316	0.00616195	0.0213272
811	R09-H-08	YDL149W	ATG9	non-essential					0.992	0.991	0.932	0.861	0.804		0.969	0.955	0.924	0.835	0.703		-0.0247982	-0.0371204	-0.0243748	-0.0263		-0.00951374	0.0194395	0.0239021	-0.0304051
812	R11-E-07	YFR019W	FAB1	non-essential					0.931	0.931	0.943	0.861	0.792		1.028	1.021	0.948	0.851	0.774		-0.024308	0.0414893	0.0417774	0.023937		-0.0183937	-0.0236019	-0.0260634	-0.00128675
813	R09-D-09	YHR208W	BAT1	non-essential					0.855	0.856	0.797	0.735	0.705		0.976	0.962	0.935	0.836	0.706		-0.0234262	-0.0411659	-0.03186	-0.00875741		-0.00968938	0.0242894	0.0177401	-0.0336264
814	R11-F-07	YNL257C	SIP3	non-essential					0.523	0.532	0.555	0.485	0.479		0.967	0.94	0.848	0.722	0.645		-0.0235781	0.04199	0.0151879	0.0487295		0.00427851	-0.0493368	-0.100093	-0.0953288
815	R10-G-04	YGL083W	SCY1	non-essential					0.729	0.733	0.711	0.654	0.592		0.937	0.921	0.891	0.799	0.718		-0.023444	-0.00294925	0.00325563	-0.0230129		-0.00659667	0.018632	0.0152884	0.0264271
816	R09-B-10	YMR109W	MYO5	non-essential					0.933	0.932	0.867	0.798	0.764		0.962	0.946	0.913	0.817	0.69		-0.0232577	-0.0456834	-0.037489	-0.0143008		-0.00722394	0.0167038	0.0111386	-0.0389972
817	R09-D-08	YFR053C	HXK1	non-essential					0.504	0.513	0.466	0.406	0.425		0.957	0.94	0.886	0.735	0.588		-0.023082	-0.0378546	-0.0618788	-0.0019404		-0.00604141	-0.00702053	-0.084004	-0.174716
818	R09-H-07	YML075C	HMG1	non-essential					0.999	0.996	0.93	0.855	0.808		0.97	0.961	0.93	0.833	0.705		-0.0227759	-0.0448981	-0.0373316	-0.0265077		-0.0148242	0.0197785	0.0150844	-0.0339621
819	R11-H-10	YJL112W	MDV1	non-essential					0.99	0.987	0.944	0.858	0.798		0.967	0.957	0.9	0.795	0.722		-0.0225409	-0.0191202	-0.0236867	-0.0298474		-0.0136919	-0.00940074	-0.027717	-0.00605688
820	R09-F-08	YMR273C	ZDS1	non-essential					0.921	0.919	0.856	0.758	0.731		0.949	0.93	0.886	0.787	0.671		-0.0218418	-0.043808	-0.0727838	-0.0437344		-0.00372652	0.00355029	-0.00907678	-0.0485463
821	R09-D-02	YMR186W	HSC82	non-essential					0.949	0.946	0.896	0.819	0.788		0.981	0.963	0.926	0.845	0.721		-0.0214704	-0.0282764	-0.0268699	0.00209394		-0.0055865	0.01321	0.0278217	-0.0137921
822	R10-E-05	YDR022C	ATG31	non-essential					0.944	0.941	0.924	0.844	0.779		0.969	0.952	0.909	0.818	0.744		-0.0213398	0.0089464	0.00966018	-0.00432972		-0.00634249	0.00590695	0.00603374	0.0298692
823	R10-D-03	YJL036W	SNX4	non-essential					0.9	0.898	0.889	0.805	0.745		0.972	0.955	0.923	0.824	0.737		-0.0212935	0.0167178	0.00868213	-0.00201352		-0.00641777	0.0183259	0.0102882	0.0169487
824	R10-G-08	YJL128C	PBS2	non-essential					0.899	0.897	0.848	0.776	0.738		0.944	0.915	0.88	0.788	0.717		-0.0212674	-0.0286122	-0.0261955	-0.0101948		0.00696976	0.012725	0.00801708	0.0313768
825	R10-B-08	YMR139W	RIM11	non-essential					0.888	0.886	0.883	0.815	0.744		0.952	0.938	0.896	0.804	0.725		-0.0209802	0.0231533	0.0343195	0.00989065		-0.0090872	0.00622949	0.00350616	0.018206
826	R11-G-07	YML109W	ZDS2	non-essential					0.97	0.966	0.941	0.843	0.79		0.971	0.962	0.904	0.813	0.746		-0.0209161	0.00063555	-0.0191439	-0.0173043		-0.0148493	-0.0102318	-0.0107252	0.0220839
827	R11-D-05	YGR010W	NMA2	non-essential					0.754	0.755	0.757	0.674	0.614		0.922	0.886	0.83	0.737	0.665		-0.0207891	0.0248901	0.00381373	-0.0180909		0.0149213	-0.0122989	-0.0244463	-0.0103912
828	R09-C-12	YOR133W	EFT1	non-essential					0.96	0.956	0.868	0.815	0.788		0.966	0.944	0.898	0.812	0.69		-0.020655	-0.0710118	-0.042858	-0.00893142		-0.00098181	0.00211416	0.00706466	-0.036883
829	R10-C-07	YER062C	GPP2/HOR2	non-essential					0.918	0.915	0.904	0.815	0.764		0.956	0.938	0.895	0.803	0.726		-0.020661	0.0149623	0.00234597	0.00444231		-0.00495923	0.0051159	0.00226854	0.0195987
830	R09-F-03	YNL121C	TOM70	non-essential					0.913	0.91	0.835	0.779	0.761		0.968	0.952	0.876	0.824	0.706		-0.0205304	-0.0576677	-0.0368064	0.00597621		-0.00737449	-0.0308414	0.0134595	-0.0230556
831	R10-H-11	YHR030C	SLT2	non-essential					0.99	0.985	0.959	0.878	0.818		0.96	0.948	0.924	0.825	0.748		-0.0203358	7.24202e-05	0.00333223	-0.00111716		-0.0114021	0.0268391	0.0189254	0.0396686
832	R12-A-01	YHR135C	YCK1	non-essential					0.864	0.862	0.832	0.771	0.683		1.006	0.935	0.889	0.787	0.709		-0.0203536	-0.00814353	0.00618979	-0.0445503		0.0498116	0.00160564	-0.0143622	-0.000906912
833	R09-H-10	YJL029C	VPS53	non-essential					0.999	0.993	0.933	0.867	0.816		0.971	0.962	0.931	0.842	0.709		-0.0194682	-0.0381929	-0.0191357	-0.01259		-0.0148493	0.019835	0.0251659	-0.0294481
834	R10-C-11	YDR312W	SSF2	non-essential					0.949	0.944	0.908	0.838	0.787		0.955	0.941	0.907	0.814	0.735		-0.0192653	-0.0124813	-0.00109159	0.00297275		-0.00916247	0.0153077	0.0127112	0.0289623
835	R10-F-09	YBL003C	HTA2	non-essential					0.939	0.934	0.935	0.828	0.789		0.971	0.95	0.908	0.813	0.744		-0.0190042	0.0291217	-0.00247318	0.0166506		-0.00216435	0.00690753	0.00195979	0.0319834
836	R10-H-08	YPL140C	MKK2	non-essential					0.992	0.985	0.958	0.862	0.817		0.962	0.949	0.923	0.824	0.746		-0.0181829	-0.00106008	-0.0165189	-0.00244342		-0.0103952	0.0246684	0.0166307	0.035826
837	R11-G-06	YIL002C	INP51	non-essential					0.982	0.975	0.946	0.839	0.796		0.978	0.961	0.91	0.814	0.746		-0.0179218	-0.00362476	-0.0340295	-0.0192695		-0.00656831	-0.00249321	-0.00843049	0.023141
838	R09-A-10	YCR009C	RVS161	non-essential					1.012	1.004	0.928	0.867	0.832		0.98	0.969	0.938	0.843	0.718		-0.0176026	-0.0559833	-0.0312636	-0.0034977		-0.012961	0.0202305	0.0190039	-0.0243129
839	R10-D-02	YMR068W	AVO2	non-essential					0.97	0.963	0.948	0.864	0.805		0.964	0.946	0.917	0.819	0.743		-0.0176085	0.0118707	0.0102183	0.00589725		-0.00515996	0.0211581	0.0136139	0.0348189
840	R09-F-12	YGR143W	SKN1	non-essential					0.995	0.987	0.895	0.826	0.808		0.961	0.953	0.903	0.811	0.695		-0.0171587	-0.0746128	-0.063389	-0.0165848		-0.0156555	-0.00183165	-0.00368671	-0.039433
841	R10-H-10	YFR021W	ATG18	non-essential					0.991	0.983	0.963	0.866	0.807		0.969	0.956	0.934	0.824	0.745		-0.0170543	0.0068075	-0.00935104	-0.0135009		-0.0105708	0.0295183	0.00923116	0.0270336
842	R10-H-07	YNL223W	ATG4	non-essential					0.989	0.981	0.954	0.875	0.815		0.96	0.948	0.916	0.82	0.738		-0.0170021	-0.00117995	0.00402029	-0.000685795		-0.0114021	0.0179304	0.0127373	0.025741
843	R11-H-09	YOR321W	PMT3	non-essential					1.027	1.018	0.978	0.891	0.82		0.999	0.982	0.926	0.828	0.749		-0.0168917	-0.0147937	-0.0169224	-0.0348483		-0.00709522	-0.00687457	-0.0133025	0.00512052
844	R11-G-10	YDR213W	UPC2	non-essential					0.942	0.935	0.931	0.838	0.794		0.968	0.956	0.904	0.817	0.754		-0.0168775	0.0234891	0.00883123	0.0221794		-0.0116028	-0.00388931	0.000567789	0.0395685
845	R11-F-04	YLR436C	ECM30	non-essential					0.566	0.568	0.546	0.479	0.472		0.968	0.946	0.861	0.728	0.654		-0.0169831	-0.00789381	-0.0319475	-0.000245658		-0.00103199	-0.0412027	-0.0990099	-0.0891365
846	R10-H-05	YKL116C	PRR1	non-essential					1.018	1.009	0.976	0.881	0.831		0.985	0.972	0.937	0.835	0.755		-0.0166567	-0.00713589	-0.0194065	-0.0103366		-0.0109723	0.0159457	0.0059317	0.0240479
847	R05-F-03	YHR102W	KIC1	non-essential					0.976	0.968	0.912	0.836	0.758		0.968	0.962	0.924	0.833	0.721		-0.0166627	-0.0344121	-0.0300338	-0.0619496		-0.0179453	0.0120399	0.0140273	-0.012735
848	R11-H-12	YHR117W	TOM71	non-essential					1.011	1.002	0.961	0.889	0.823		0.983	0.968	0.913	0.822	0.738		-0.016474	-0.0164057	-0.00176324	-0.013229		-0.00880793	-0.00655203	-0.00592908	0.00459934
849	R04-H-07	YPL127C	HHO1	non-essential					0.961	0.953	0.913	0.853	0.806		0.989	0.983	0.945	0.855	0.766		-0.016271	-0.0167416	0.00759601	0.0182489		-0.0184722	0.0132265	0.0190563	0.0277403
850	R09-G-10	YNL106C	INP52	non-essential					0.968	0.96	0.91	0.82	0.787		0.978	0.962	0.927	0.829	0.71		-0.0164538	-0.0278568	-0.0410647	-0.0146678		-0.00762539	0.0153807	0.00907678	-0.0280554
851	R11-B-06	YJL057C	IKS1	non-essential					0.839	0.834	0.911	0.821	0.756		0.964	0.936	0.893	0.804	0.728		-0.0163932	0.112195	0.0990955	0.0831376		0.00541087	0.0050029	0.00562033	0.0244984
852	R11-A-03	YPL141C	FRK1	non-essential					1.004	0.995	0.958	0.877	0.812		0.972	0.955	0.906	0.808	0.733		-0.0162912	-0.0120854	-0.00893382	-0.0201001		-0.00641777	-0.000605056	-0.00951374	0.0113776
853	R09-B-06	YGR209C	TRX2	non-essential					0.915	0.908	0.857	0.768	0.735		0.964	0.949	0.913	0.803	0.682		-0.0161725	-0.0305476	-0.0482489	-0.0263015		-0.00833121	0.0135325	-0.00935937	-0.0533105
854	R09-G-08	YDR326C	YSP2	non-essential					0.945	0.937	0.881	0.797	0.774		0.961	0.941	0.904	0.807	0.689		-0.0158533	-0.0353411	-0.0442423	-0.00655088		-0.00297052	0.0119669	0.00404779	-0.0351046
855	R11-B-08	YDL113C	ATG20	non-essential					0.714	0.711	0.772	0.7	0.645		0.973	0.956	0.895	0.788	0.704		-0.0153346	0.0903892	0.0845834	0.0715347		-0.00644286	-0.0139116	-0.0353233	-0.0300694
856	R11-G-08	YHL007C	STE20	non-essential					0.945	0.936	0.934	0.846	0.788		0.968	0.954	0.895	0.796	0.729		-0.0147507	0.0257841	0.0176543	0.0131193		-0.00948865	-0.0117974	-0.0233081	0.00686367
857	R10-D-08	YNL307C	MCK1	non-essential					0.808	0.802	0.806	0.731	0.671		0.946	0.928	0.89	0.786	0.702		-0.0144813	0.0285635	0.0227142	0.00568669		-0.00470833	0.0101188	-0.00820024	-0.00325664
858	R11-F-11	YDR128W	MTC5	non-essential					0.846	0.839	0.787	0.668	0.586		0.969	0.947	0.882	0.817	0.718		-0.0143709	-0.0337478	-0.0962434	-0.147839		-0.00105708	-0.0188745	0.0100815	-0.00105708
859	R09-F-05	YNL098C	RAS2	non-essential					1.047	1.035	0.975	0.907	0.884		1.01	1	0.972	0.893	0.77		-0.0141063	-0.0369343	-0.0158144	0.0312892		-0.0147708	0.0253229	0.0481156	0.0153409
860	R11-H-05	YER105C	NUP157	non-essential					1.044	1.032	0.986	0.907	0.833		1	0.983	0.938	0.847	0.763		-0.014028	-0.0211692	-0.0125068	-0.0330424		-0.00712031	0.00543138	0.00915528	0.023562
861	R11-A-10	YNL183C	NPR1	non-essential					0.96	0.95	0.938	0.85	0.796		0.97	0.954	0.899	0.804	0.729		-0.0140398	0.0148786	0.00718153	0.00829388		-0.00742467	-0.00734307	-0.0134072	0.00686367
862	R12-A-03	YKL008C	LAC1	non-essential					0.812	0.805	0.784	0.736	0.663		0.963	0.894	0.854	0.786	0.698		-0.0134832	0.000340875	0.02561	-0.008231		0.0487763	0.00597051	0.0277406	0.0271131
863	R10-A-01	YLR386W	VAC14	non-essential					1.018	1.006	0.988	0.915	0.855		1.011	1.01	0.971	0.88	0.806		-0.0133491	0.00976175	0.0260847	0.0248012		-0.0243096	0.0136385	0.0214556	0.0549094
864	R11-C-03	YDL159W	STE7	non-essential					0.976	0.965	0.946	0.866	0.791		0.97	0.956	0.9	0.803	0.723		-0.013355	0.0074006	0.0104946	-0.0148755		-0.00953883	-0.00834365	-0.0167589	-0.00360704
865	R11-A-11	YOR267C	HRK1	non-essential					0.962	0.951	0.979	0.876	0.8		0.988	0.976	0.929	0.814	0.729		-0.0129895	0.0602087	0.0383371	0.0124964		-0.0121046	0.00280868	-0.0242867	-0.0163921
866	R09-F-09	YMR054W	STV1	non-essential					0.948	0.937	0.866	0.791	0.77		0.981	0.966	0.923	0.825	0.707		-0.012624	-0.0523286	-0.0516865	-0.0118559		-0.00875775	0.00669799	-0.000102045	-0.036462
867	R12-A-04	YKL166C	TPK3	non-essential					0.983	0.971	0.949	0.883	0.785		1.002	0.939	0.91	0.822	0.752		-0.0124353	0.00418289	0.0249712	-0.0294482		0.0414553	0.0207626	0.0247263	0.0547533
868	R10-C-09	YBR118W	TEF2	non-essential					0.859	0.85	0.848	0.782	0.747		0.944	0.931	0.894	0.812	0.732		-0.0125053	0.0232069	0.0330679	0.0535607		-0.00994356	0.0114019	0.0208067	0.0353548
869	R09-H-05	YGR032W	GSC2	non-essential					1.034	1.02	0.949	0.886	0.824		0.998	0.985	0.916	0.859	0.726		-0.0115618	-0.0498414	-0.025331	-0.0317484		-0.0112985	-0.0211817	0.0218926	-0.0300842
870	R11-D-01	YFR014C	CMK1	non-essential					1.026	1.012	0.965	0.893	0.833		0.985	0.968	0.927	0.83	0.755		-0.0113529	-0.022901	-0.00782582	-0.0109917		-0.00674395	0.00903817	0.00397191	0.0282762
871	R11-G-09	YBL104C	SEA4	non-essential					0.817	0.808	0.874	0.774	0.728		0.998	0.983	0.938	0.87	0.791		-0.0114087	0.0989585	0.0694488	0.0746683		-0.00918429	0.00543138	0.0376206	0.0625593
872	R11-B-03	YMR154C	RIM13	non-essential					0.976	0.963	0.933	0.842	0.752		0.971	0.958	0.909	0.803	0.712		-0.01115	-0.00511687	-0.017077	-0.0643945		-0.010621	-0.000435546	-0.0188731	-0.0210415
873	R10-D-12	YPL149W	ATG5	non-essential					0.971	0.958	0.947	0.866	0.799		0.947	0.928	0.905	0.805	0.729		-0.0110194	0.0162509	0.0182124	0.00345237		-0.00367633	0.0268226	0.0153146	0.0343478
874	R11-B-10	YDR477W	SNF1	non-essential					0.748	0.74	0.726	0.634	0.612		0.929	0.945	0.882	0.773	0.69		-0.0107097	0.00632054	-0.029276	-0.00420543		-0.0402226	-0.0167603	-0.0422597	-0.0379401
875	R09-B-07	YLR043C	TRX1	non-essential					0.953	0.94	0.89	0.799	0.766		0.964	0.952	0.917	0.817	0.692		-0.0105495	-0.0284562	-0.0450685	-0.0204686		-0.0115025	0.0148156	0.00479612	-0.0425542
876	R11-H-04	YBL079W	NUP170	non-essential					0.992	0.978	0.909	0.847	0.79		0.973	0.948	0.905	0.838	0.758		-0.0104652	-0.048835	-0.0274116	-0.0305347		0.0020138	0.00568094	0.0350145	0.0535961
877	R09-E-09	YDR382W	RPP2B	non-essential					0.363	0.364	0.339	0.337	0.363		0.928	0.916	0.884	0.829	0.717		-0.0105803	-0.0174046	0.0167911	0.0801093		-0.0105992	0.0161223	0.0577026	0.0303197
878	R11-E-06	YGR105W	VMA21	non-essential					0.933	0.92	0.912	0.83	0.759		0.976	0.96	0.898	0.812	0.739		-0.0100273	0.0185096	0.0154437	-0.00770167		-0.00757521	-0.0147992	-0.00984866	0.0144488
879	R09-A-09	YOR184W	SER1	non-essential					1.011	0.996	0.928	0.857	0.811		0.973	0.957	0.927	0.827	0.689		-0.00985874	-0.0471631	-0.0348503	-0.0225289		-0.00749994	0.0206661	0.0118869	-0.0520179
880	R10-F-03	YDL077C	VAM6/VPS39	non-essential					0.922	0.909	0.893	0.824	0.774		0.955	0.936	0.891	0.809	0.733		-0.00974006	0.00911996	0.0201274	0.0243201		-0.00387706	0.00277572	0.0118084	0.0314622
881	R09-H-09	YKL176C	LST4	non-essential					1.003	0.988	0.917	0.843	0.79		0.973	0.957	0.919	0.817	0.694		-0.00964986	-0.0508003	-0.0433997	-0.04156		-0.00749994	0.0117574	-0.000489293	-0.0450541
882	R12-A-10	YMR183C	SSO2	non-essential					0.836	0.825	0.787	0.716	0.578		0.959	0.89	0.839	0.737	0.616		-0.0096997	-0.0183123	-0.0212546	-0.143014		0.0488767	-0.00650494	-0.0286747	-0.0828647
883	R11-F-01	YAL017W	PSK1	non-essential					0.907	0.894	0.857	0.79	0.737		0.995	0.973	0.902	0.813	0.742		-0.00934841	-0.0151121	-0.00551815	-0.00821345		-0.00170944	-0.0240869	-0.0223531	0.00488496
884	R12-B-01	YCR027C	RHB1	non-essential					0.976	0.961	0.923	0.858	0.761		0.989	0.926	0.885	0.805	0.726		-0.0089449	-0.0142368	0.00497919	-0.0502531		0.0417815	0.00666503	0.0174288	0.0322837
885	R09-B-12	YOL045W	PSK2	non-essential					1.016	1	0.903	0.856	0.822		0.984	0.972	0.937	0.841	0.709		-0.00888675	-0.0798858	-0.0405011	-0.0123502		-0.0120043	0.0159457	0.0133574	-0.040019
886	R10-D-05	YOL082W	ATG19	non-essential					0.891	0.878	0.88	0.786	0.688		0.93	0.917	0.896	0.801	0.712		-0.00893066	0.028576	0.00715964	-0.0555596		-0.00959229	0.0284282	0.021992	0.0222988
887	R09-H-11	YHL003C	LAG1	non-essential					1.003	0.987	0.927	0.862	0.813		0.97	0.957	0.926	0.84	0.701		-0.00854732	-0.0383727	-0.018724	-0.00995353		-0.0105959	0.0195525	0.0279761	-0.0353048
888	R11-E-08	YDR283C	GCN2	non-essential					0.911	0.897	0.919	0.831	0.773		0.966	0.948	0.885	0.791	0.721		-0.00835031	0.0517955	0.0420427	0.0362243		-0.00521014	-0.0165908	-0.0231538	0.00206411
889	R09-H-12	YLR356W	ATG33	non-essential					0.988	0.972	0.895	0.832	0.804		0.954	0.94	0.897	0.806	0.684		-0.00815568	-0.0580748	-0.0394068	-0.00535183		-0.00913738	0.00522891	0.00386725	-0.0410113
890	R12-A-09	YOR101W	RAS1	non-essential					0.973	0.957	0.931	0.864	0.756		0.989	0.924	0.892	0.802	0.723		-0.00776404	-0.000766656	0.0168335	-0.0524743		0.0438956	0.0165743	0.0158301	0.0302196
891	R10-A-05	YMR291W	TDA1	non-essential					1.003	0.986	0.969	0.896	0.805		0.984	0.97	0.935	0.839	0.759		-0.00744479	0.0102949	0.0245622	-0.0194611		-0.0098901	0.0158327	0.0129964	0.0317331
892	R10-F-02	YHR079C	IRE1	non-essential					0.958	0.942	0.93	0.846	0.792		0.962	0.945	0.903	0.814	0.741		-0.00737239	0.0146389	0.011039	0.0118091		-0.00616686	0.00662501	0.00848283	0.0330905
893	R11-A-06	YIL095W	PRK1	non-essential					0.958	0.942	0.955	0.875	0.797		0.973	0.953	0.901	0.801	0.716		-0.00737239	0.0429514	0.0470192	0.0184404		-0.00327161	-0.00405882	-0.0160629	-0.0101851
894	R11-E-05	YBL078C	ATG8	non-essential					0.953	0.937	0.928	0.851	0.796		0.977	0.961	0.899	0.813	0.739		-0.00724184	0.0178866	0.0227552	0.0226268		-0.0076003	-0.0147427	-0.00966812	0.0133917
895	R11-F-03	YCR073C	SSK22	non-essential					0.991	0.974	0.947	0.873	0.823		0.986	0.964	0.911	0.837	0.774		-0.00713147	-0.00138972	0.00925665	0.017642		-0.00148362	-0.00455087	0.0168636	0.0589669
896	R11-D-12	YNR007C	ATG3	non-essential					0.947	0.931	0.951	0.865	0.815		0.968	0.951	0.896	0.801	0.727		-0.00708519	0.0505493	0.0467401	0.054441		-0.0063174	-0.00751258	-0.0139488	0.00724941
897	R11-A-09	YPL045W	VPS16	non-essential					0.936	0.92	0.959	0.883	0.818		0.975	0.955	0.903	0.81	0.734		-0.00679798	0.0717372	0.0812005	0.0705477		-0.00332179	-0.00394581	-0.00703849	0.0127704
898	R11-H-11	YDR484W	VPS52	non-essential					0.969	0.952	0.91	0.823	0.749		0.962	0.943	0.883	0.793	0.704		-0.00655706	-0.0190365	-0.0285223	-0.0562454		-0.00405269	-0.0135325	-0.0153931	-0.0163274
899	R10-G-06	YBR131W	CCZ1	non-essential					0.926	0.91	0.87	0.795	0.737		0.966	0.951	0.915	0.813	0.733		-0.00653689	-0.0180301	-0.0169553	-0.025854		-0.00838139	0.0136455	0.000902707	0.015606
900	R03-C-08	YPL100W	ATG21	non-essential					0.904	0.946	0.909	0.828	0.737		0.973	0.967	0.929	0.831	0.753		-0.0699096	-0.0135538	-0.0157036	-0.0655453		-0.0180708	0.0123224	0.00626662	0.0265478
901	R10-A-10	YPL100W	ATG21	non-essential					0.967	0.95	0.947	0.872	0.798		0.962	0.95	0.916	0.82	0.747		-0.00650484	0.0250711	0.0344768	0.0109464		-0.0114523	0.0158162	0.0106232	0.0361616
902	R10-H-03	YBR274W	CHK1	non-essential					1.007	0.989	0.959	0.872	0.826		0.967	0.956	0.92	0.823	0.751		-0.00644669	-0.00433772	-0.00852208	0.00508278		-0.0126348	0.0139281	0.00799353	0.0353902
903	R09-E-11	YNL030W	HHF2	non-essential					0.788	0.775	0.711	0.707	0.682		0.958	0.96	0.911	0.839	0.707		-0.00624137	-0.0492558	0.0227059	0.050044		-0.0261511	-0.00032254	0.0235672	-0.0301195
904	R09-G-12	YPL150W		non-essential					0.993	0.975	0.898	0.828	0.792		0.96	0.941	0.903	0.812	0.69		-0.00608116	-0.0579849	-0.0476772	-0.0245746		-0.00400251	0.0108533	0.0102359	-0.0337118
905	R11-A-01	YNR047W	FPK1	non-essential					1.033	1.014	0.916	0.826	0.757		0.991	0.968	0.893	0.793	0.712		-0.006023	-0.0805987	-0.0931574	-0.113993		-0.000551996	-0.0288237	-0.0418202	-0.0316124
906	R01-A-04	YGL234W	ADE5,7	non-essential					0.99	0.972	0.966	0.867	0.78		0.979	0.965	0.942	0.848	0.729		-0.00600283	0.0223329	0.00401755	-0.0371821		-0.00976465	0.0289132	0.0294204	-0.00476423
907	R10-A-07	YJR103W	URA8	non-essential					0.979	0.961	0.951	0.875	0.799		0.957	0.941	0.912	0.818	0.739		-0.00571562	0.0174733	0.026071	0.000144763		-0.00709849	0.0208756	0.0176616	0.0345333
908	R07-H-12	YDR364C	CDC40	non-essential					1.001	0.982	0.93	0.864	0.818		0.978	0.955	0.919	0.81	0.726		-0.0051875	-0.0294626	-0.0107299	0.00219045		-0.000225816	0.0138716	-0.00703849	0.00162832
909	R11-B-01	YKL168C	KKQ8	non-essential					1.027	1.007	0.96	0.882	0.808		0.976	0.953	0.908	0.812	0.731		-0.00476381	-0.0230509	-0.0159608	-0.0386355		-0.000175635	0.00373628	-0.00244908	0.0107063
910	R12-A-05	YPL203W	TPK2	non-essential					0.98	0.961	0.939	0.859	0.75		0.999	0.938	0.902	0.803	0.721		-0.0046392	0.00388322	0.00621989	-0.064842		0.0394164	0.012911	0.00226854	0.0126349
911	R10-B-03	YLR328W	NMA1	non-essential					0.937	0.919	0.915	0.83	0.757		0.958	0.933	0.902	0.809	0.727		-0.00461902	0.0230097	0.0165462	-0.00925165		0.00239016	0.0181964	0.0149797	0.0262769
912	R12-A-11	YGL210W	YPT32	non-essential					0.976	0.957	0.932	0.865	0.76		0.984	0.919	0.888	0.799	0.728		-0.00453476	0.000365847	0.0180742	-0.0471692		0.0440211	0.0174054	0.0174026	0.0424688
913	R09-G-07	YKL101W	HSL1	non-essential					0.932	0.914	0.857	0.788	0.751		0.948	0.945	0.908	0.821	0.696		-0.00448847	-0.0371628	-0.0300503	-0.0116965		-0.0206147	0.0121929	0.0171462	-0.0295836
914	R10-B-12	YBL016W	FUS3	non-essential					1.012	0.992	0.991	0.923	0.838		0.972	0.966	0.955	0.871	0.773		-0.00437217	0.0285948	0.0514457	0.0176903		-0.0180457	0.0423327	0.0568286	0.05546
915	R10-C-08	YER174C	GRX4	non-essential					0.924	0.906	0.889	0.799	0.758		0.958	0.938	0.896	0.805	0.731		-0.0042796	0.00789755	-0.00758233	0.00640758		-0.00289525	0.00622949	0.00474379	0.0265625
916	R10-D-06	YNL051W	COG5	non-essential					0.881	0.864	0.859	0.781	0.72		0.968	0.944	0.912	0.812	0.725		-0.00425942	0.020229	0.0163917	0.0023162		0.00108217	0.0177044	0.00706466	0.0118635			5
917	R10-E-01	YGL005C	COG7	non-essential					0.998	0.978	0.949	0.864	0.79		0.968	0.957	0.916	0.821	0.737		-0.00400663	-0.00353486	-0.00631975	-0.0305347		-0.0126599	0.00841664	0.0044612	0.0148345			5
918	R10-E-12	YJR033C	RAV1	non-essential					0.987	0.967	0.924	0.861	0.803		0.969	0.952	0.908	0.809	0.735		-0.00371943	-0.0197195	0.00208606	-0.00116541		-0.00634249	0.00479336	-0.00510487	0.0173344
919	R11-D-07	YNL084C	END3	non-essential					0.821	0.805	0.827	0.724	0.648		0.994	1	0.925	0.81	0.712		-0.00379538	0.0490385	0.0107217	-0.0281249		-0.0312827	-0.0270156	-0.0546072	-0.065439
920	R11-F-12	YDR507C	GIN4	non-essential					0.941	0.922	0.928	0.841	0.794		0.965	0.941	0.881	0.797	0.727		-0.00362092	0.0344246	0.0268863	0.0365124		0.00115745	-0.0136455	-0.00832845	0.0178202
921	R11-G-03	YCL024W	KCC4	non-essential					0.968	0.948	0.928	0.837	0.779		0.968	0.952	0.898	0.805	0.731		-0.00322334	0.00575866	-0.00674243	-0.0120475		-0.00737449	-0.00634249	-0.0100554	0.0117634
922	R10-D-04	YLR423C	ATG17	non-essential					0.909	0.89	0.892	0.821	0.757		0.954	0.931	0.902	0.806	0.729		-0.00278542	0.0289356	0.0373535	0.0227219		0.000376361	0.0203106	0.013381	0.0311766
923	R11-G-04	YHR082C	KSP1	non-essential					0.988	0.967	0.942	0.85	0.788		0.967	0.945	0.893	0.797	0.724		-0.002643	0.000665517	-0.0115616	-0.0210593		-0.0010069	-0.00451085	-0.0125568	0.00941363
924	R11-E-09	YNL242W	ATG2	non-essential					0.904	0.885	0.917	0.838	0.771		0.983	0.965	0.905	0.816	0.742		-0.00265487	0.0627609	0.063958	0.0468022		-0.00563668	-0.0122895	-0.0101836	0.0133416
925	R11-C-10	YOR197W	MCA1	non-essential					0.86	0.842	0.912	0.835	0.776		0.973	0.952	0.894	0.801	0.725		-0.00260858	0.104507	0.107645	0.100843		-0.00221453	-0.0107968	-0.0150059	0.00340681
926	R09-H-03	YDR067C	OCA6	non-essential					0.984	0.963	0.857	0.823	0.751		0.958	0.94	0.834	0.805	0.684		-0.00253856	-0.0911871	-0.0406502	-0.0657208		-0.00500941	-0.064927	0.00262962	-0.0410113
927	R09-D-01	YPL240C	HSP82	non-essential					1.023	1.001	0.927	0.872	0.835		0.982	0.967	0.889	0.846	0.725		-0.0024543	-0.0538082	-0.0217525	0.00378869		-0.00878284	-0.032221	0.024831	-0.0124494
928	R10-A-02	YHL029C	OCA5	non-essential					0.977	0.956	0.943	0.87	0.804		0.975	0.954	0.911	0.83	0.762		-0.0023558	0.0139259	0.0253802	0.0122887		-0.00226471	0.00601996	0.0187711	0.0528247
929	R11-F-05	YKL129C	MYO3	non-essential					0.972	0.951	0.937	0.847	0.776		0.965	0.942	0.888	0.792	0.721		-0.00222525	0.0126436	0.00235691	-0.0193339		0.000100363	-0.00690753	-0.0155737	0.0084066
930	R11-G-05	YBL085W	BOI1	non-essential					0.965	0.944	0.928	0.831	0.779		0.979	0.956	0.902	0.805	0.732		-0.00204248	0.0101688	-0.00977646	-0.00763733		-0.000250907	-0.00611648	-0.0142837	0.00892778
931	R10-B-01	YOL016C	CMK2	non-essential					1.001	0.979	0.959	0.875	0.828		0.963	0.948	0.916	0.816	0.746		-0.00187989	0.00668764	0.00622536	0.0187607		-0.00830612	0.0179304	0.00778683	0.036883
932	R11-F-08	YHR155W	YSP1	non-essential					0.871	0.852	0.921	0.829	0.769		0.958	0.938	0.879	0.785	0.716		-0.00179325	0.103675	0.0891755	0.0805334		-0.00289525	-0.0127015	-0.0200087	0.00567114
933	R10-H-01	YPR111W	DBF20	non-essential					1.027	1.004	0.981	0.901	0.861		0.991	0.977	0.948	0.852	0.784		-0.0014562	0.0040393	0.01092	0.0349638		-0.0100657	0.0229097	0.0216859	0.0591524
934	R10-H-02	YJL058C	BIT61	non-essential					1.018	0.995	0.975	0.883	0.835		0.978	0.959	0.935	0.836	0.753		-0.00122122	0.00716711	-0.00148965	0.0104039		-0.00445415	0.0274606	0.0209114	0.0350044
935	R09-H-01	YNL298W	CLA4	non-essential					1.015	0.992	0.895	0.868	0.806		0.993	0.987	0.875	0.861	0.717		-0.00114289	-0.0801255	-0.0167925	-0.02475		-0.0185726	-0.0689529	0.0222537	-0.0447331
936	R10-H-12	YBR288C	APM3	non-essential					0.994	0.971	0.948	0.865	0.809		0.952	0.923	0.896	0.798	0.719		-0.000594586	0.00305039	0.0026387	0.002382		0.00676904	0.0220857	0.0119367	0.0257057
937	R12-A-02	YCR068W	ATG15	non-essential					0.978	0.955	0.926	0.861	0.768		0.991	0.93	0.89	0.801	0.73		-0.000176833	-0.0042241	0.0153165	-0.0343541		0.0396171	0.00800463	0.00824995	0.0336264
938	R10-A-08	YLR433C	CNA1	non-essential					0.995	0.971	0.955	0.884	0.815		0.964	0.946	0.914	0.817	0.739		0.00048184	0.0109779	0.0262119	0.0103396		-0.00515996	0.0178174	0.0111386	0.0292479
939	R11-H-08	YGR261C	APL6	non-essential					0.995	0.971	0.914	0.818	0.762		0.976	0.942	0.886	0.797	0.72		0.00048184	-0.0354547	-0.055674	-0.0599522		0.0114523	-0.0091347	-0.00938553	0.00701385
940	R11-C-09	YIL074C	SER33	non-essential					0.868	0.847	0.903	0.822	0.764		0.964	0.939	0.879	0.792	0.714		0.000490148	0.0888022	0.0860033	0.0794147		0.00223962	-0.0137586	-0.0124024	0.00182855
941	R09-E-04	YER177W	BMH1	non-essential					0.782	0.763	0.702	0.666	0.645		1.003	0.994	0.9	0.878	0.74		0.000530499	-0.0462179	-0.0149321	0.0142028		-0.0156522	-0.0485128	0.0358937	-0.0200993
942	R11-C-08	YDR247W	VHS1	non-essential					0.823	0.803	0.872	0.787	0.712		0.97	0.943	0.883	0.793	0.705		0.000562543	0.102206	0.0910905	0.0589608		0.00420324	-0.0135325	-0.0153931	-0.0149346
943	R09-C-08	YEL013W	VAC8	non-essential					0.612	0.597	0.535	0.513	0.505		0.864	0.829	0.782	0.697	0.541		0.000558982	-0.0523249	-0.0217375	0.0115474		0.0153195	-0.0054973	-0.0136976	-0.122839
944	R09-B-04	YER031C	YPT31	non-essential					0.934	0.911	0.844	0.759	0.734		0.965	0.944	0.905	0.803	0.672		0.000971988	-0.0485778	-0.0627228	-0.0309353		-0.0020138	0.00990927	-0.00407395	-0.0619527
945	R11-G-11	YNL079C	TPM1	non-essential					0.889	0.867	0.908	0.827	0.776		0.971	0.947	0.896	0.802	0.724		0.00104438	0.072414	0.070156	0.0732792		0.0010069	-0.00328425	-0.00848283	0.00729946
946	R09-D-10	YLR180W	SAM1	non-essential					0.799	0.779	0.719	0.67	0.663		0.948	0.923	0.899	0.808	0.678		0.00118917	-0.0446059	-0.0276099	0.0204349		0.00264107	0.0254265	0.0243129	-0.0313974
947	R10-A-04	YML057W	CMP2	non-essential					0.956	0.932	0.92	0.855	0.767		0.961	0.945	0.908	0.813	0.733		0.00150011	0.0143392	0.0332306	-0.010322		-0.00719885	0.0121929	0.0072452	0.0219484
948	R11-F-10	YPR049C	ATG11	non-essential					0.866	0.844	0.914	0.816	0.748		0.973	0.946	0.88	0.79	0.719		0.0016449	0.104567	0.0818667	0.0615022		0.00412797	-0.0200445	-0.0222772	0.00139276
949	R11-H-07	YDR027C	VPS54	non-essential					0.982	0.957	0.921	0.829	0.761		0.983	0.958	0.899	0.793	0.709		0.0019238	-0.0120917	-0.0265908	-0.045843		0.00176289	-0.0115714	-0.0312493	-0.0252198
950	R11-C-11	YML097C	VPS9	non-essential					0.884	0.861	0.894	0.809	0.751		0.974	0.95	0.891	0.793	0.708		0.00227747	0.0631742	0.0544387	0.0467379		0.000931629	-0.0120234	-0.0227927	-0.0181559
951	R09-E-02	YDR099W	BMH2	non-essential					0.925	0.901	0.814	0.781	0.748		1.003	0.989	0.882	0.87	0.737		0.00230951	-0.0715275	-0.0244022	-0.00134234		-0.0103668	-0.0632719	0.0312781	-0.0189921
952	R11-A-02	YIL066C	RNR3	non-essential					0.965	0.94	0.935	0.844	0.77		0.983	0.961	0.909	0.797	0.717		0.00236766	0.0225065	0.0107627	-0.0151635		-0.00140835	-0.00360679	-0.0294701	-0.017249
953	R11-A-05	YLR228C	ECM22	non-essential					0.95	0.925	0.952	0.866	0.794		1.005	0.951	0.923	0.812	0.734		0.00275931	0.0582971	0.054596	0.0332048		0.0318663	0.0225542	-0.000334917	0.0169987
954	R09-E-03	YIL053W	GPP1/RHR2	non-essential					0.976	0.95	0.869	0.824	0.792		0.996	0.982	0.887	0.843	0.73		0.00318299	-0.0632641	-0.0250765	0.00298884		-0.0101912	-0.0503044	0.00526186	-0.0213419
955	R11-B-12	YDL025C	RTK1	non-essential					0.885	0.861	0.909	0.829	0.771		0.98	0.959	0.96	0.806	0.728		0.00335389	0.0801617	0.0792526	0.0732631		-0.00239016	0.0553002	-0.0162173	0.000185505
956	R11-C-06	YPR119W	CLB2	non-essential					0.875	0.851	0.901	0.819	0.753		0.966	0.942	0.89	0.799	0.717		0.00361499	0.0821271	0.077871	0.0604157		0.00113235	-0.00468036	-0.00691028	0.00283557
957	R11-E-11	YNR031C	SSK2	non-essential					0.921	0.895	0.891	0.819	0.764		0.976	0.946	0.883	0.791	0.719		0.00461902	0.0222905	0.0293595	0.026493		0.00722394	-0.0167038	-0.0210396	0.00139276
958	R11-G-12	YNL056W	OCA2	non-essential					0.962	0.935	0.902	0.806	0.727		0.95	0.916	0.851	0.755	0.686		0.00465106	-0.00935345	-0.030871	-0.06668		0.0121046	-0.0206261	-0.0338816	-0.0128558
959	R11-D-11	YJL208C	NUC1	non-essential					0.879	0.854	0.893	0.812	0.768		0.97	0.944	0.899	0.803	0.726		0.00461309	0.0697594	0.0658786	0.077002		0.00314616	0.00322775	-0.00407395	0.0132562
960	R11-E-03	YMR311C	GLC8	non-essential					0.991	0.963	0.949	0.863	0.82		0.971	0.957	0.897	0.82	0.757		0.00499642	0.0130032	0.0089776	0.0257911		-0.00956392	-0.0127415	0.00322358	0.0426896
961	R10-G-12	YLR248W	RCK2	non-essential					0.984	0.956	0.929	0.845	0.79		0.954	0.926	0.896	0.791	0.719		0.00517919	-0.00192913	-0.00563716	-0.0062789		0.00566177	0.0189145	0.000102045	0.0225344
962	R11-C-04	YOR231W	MKK1	non-essential					0.941	0.914	0.917	0.834	0.767		0.97	0.943	0.884	0.795	0.719		0.00519936	0.0307873	0.0270217	0.00952363		0.00420324	-0.012419	-0.0129179	0.00456401
963	R11-A-12	YPR185W	ATG13	non-essential					0.93	0.903	0.922	0.84	0.781		0.97	0.944	0.883	0.778	0.705		0.00548657	0.0485778	0.0465938	0.0402192		0.00314616	-0.0145896	-0.0350145	-0.0159917
964	R09-A-12	YAL002W	VPS8	non-essential					1.01	0.981	0.9	0.57	0.808		0.972	0.958	0.926	0.796	0.691		0.00560288	-0.0623351	-0.374392	-0.00996961		-0.00958901	0.0184954	-0.0275365	-0.0502894
965	R06-D-09	YGR092W	DBF2	non-essential					0.913	0.886	0.878	0.758	0.682		0.967	0.951	0.917	0.787	0.708		0.00593043	0.0174907	-0.0364001	-0.0723375		-0.0073494	0.0158727	-0.0312755	-0.019213
966	R11-C-05	YGR256W	GND2	non-essential					0.91	0.883	0.889	0.808	0.758		0.974	0.945	0.884	0.8	0.727		0.00600876	0.0332559	0.0289422	0.0317659		0.00621704	-0.0145331	-0.00884391	0.0135919
967	R09-D-07	YGL253W	HXK2	non-essential					0.943	0.915	0.866	0.775	0.717		0.976	0.99	0.957	0.859	0.729		0.00624968	-0.0280728	-0.0472818	-0.0578919		-0.0392877	0.0191899	0.0166072	-0.0311913
968	R10-G-03	YNL123W	NMA111	non-essential					0.395	0.38	0.351	0.312	0.306		0.935	0.911	0.777	0.618	0.56		0.00622476	-0.0214551	-0.0318668	-0.0131281		0.00191017	-0.097746	-0.198151	-0.183058
969	R09-G-06	YFL033C	RIM15	non-essential					0.932	0.904	0.828	0.739	0.683		0.945	0.937	0.888	0.773	0.643		0.00653689	-0.05898	-0.0798189	-0.0908568		-0.0152541	-0.00162212	-0.0338031	-0.0949431
970	R11-D-04	YJL164C	TPK1	non-essential					0.952	0.922	0.944	0.846	0.786		0.971	0.947	0.906	0.818	0.742		0.00821977	0.0525446	0.0330898	0.0259023		0.0010069	0.0078516	0.0113192	0.0323691
971	R09-G-04	YJL024C	APS3	non-essential					0.85	0.822	0.767	0.723	0.704		0.972	0.948	0.877	0.811	0.678		0.00867787	-0.0376548	-0.00926212	0.0274025		0.00098181	-0.0254995	0.00159871	-0.0578245
972	R11-C-07	YGR108W	CLB1	non-essential					0.843	0.815	0.909	0.826	0.776		0.969	0.939	0.881	0.791	0.712		0.00886064	0.130878	0.126247	0.130611		0.00739958	-0.0115314	-0.01364	-0.000956969
973	R11-B-07	YOL113W	SKM1	non-essential					0.819	0.791	0.895	0.803	0.746		0.986	0.957	0.902	0.793	0.712		0.00948727	0.141484	0.124172	0.117284		0.00591595	-0.00717356	-0.0301923	-0.0199845
974	R11-D-08	YDL175C	AIR2	non-essential					0.841	0.812	0.907	0.819	0.758		0.963	0.931	0.885	0.794	0.718		0.0100154	0.131921	0.12087	0.110046		0.00966429	0.00137962	-0.0014705	0.0158562
975	R09-G-02	YOR106W	VAM3	non-essential					0.867	0.837	0.706	0.721	0.673		0.971	0.96	0.841	0.816	0.676		0.0104391	-0.123275	-0.0282815	-0.0302495		-0.0127352	-0.0782735	-0.00489816	-0.073295
976	R11-D-06	YIL079C	AIR1	non-essential					0.902	0.871	0.937	0.833	0.78		0.976	0.946	0.9	0.805	0.731		0.0106278	0.100846	0.07319	0.074174		0.00722394	0.00222717	-0.00371287	0.0181058
977	R10-F-07	YPL135W	ISU1	non-essential					0.881	0.85	0.858	0.791	0.769		0.939	0.904	0.883	0.837	0.764		0.0111761	0.034532	0.0442341	0.0827384		0.0134377	0.0276937	0.0802886	0.108464
978	R11-B-04	YNL027W	CRZ1	non-essential					0.94	0.907	0.927	0.836	0.775		0.975	0.94	0.893	0.799	0.72		0.0118407	0.0498301	0.0372208	0.0278515		0.0125344	0.000774566	-0.00479612	0.00912801
979	R11-B-02	YLR362W	STE11	non-essential					0.959	0.925	0.929	0.838	0.768		0.974	0.945	0.883	0.783	0.721		0.0124471	0.0322495	0.0198566	-0.00127801		0.00621704	-0.0156467	-0.0298835	0.00523536
980	R10-B-11	YCR095C	OCA4	non-essential					0.925	0.891	0.862	0.78	0.71		0.946	0.917	0.879	0.782	0.709		0.0133349	-0.00614199	-0.0146175	-0.0407149		0.00691958	0.00949726	-0.00152283	0.0181206
981	R11-E-01	YNL032W	SIW14	non-essential					0.991	0.955	0.893	0.791	0.707		0.964	0.924	0.859	0.776	0.71		0.0138167	-0.0415967	-0.0715321	-0.115256		0.0180959	-0.020174	-0.0163481	0.0121138
982	R10-D-11	YDL173W	PAR32	non-essential					0.903	0.869	0.84	0.747	0.685		0.949	0.929	0.895	0.79	0.698		0.0139093	-0.00680126	-0.0313046	-0.0496156		-0.00266943	0.0146296	-0.00430683	-0.00988475
983	R11-E-02	YNL099C	OCA1	non-essential					0.943	0.908	0.853	0.771	0.697		0.968	0.928	0.864	0.781	0.712		0.0139674	-0.0350776	-0.0445269	-0.0766994		0.0179955	-0.0188344	-0.0143884	0.0106709
984	R09-G-11	YOL100W	PKH2	non-essential					0.975	0.939	0.864	0.789	0.779		0.972	0.949	0.908	0.806	0.692		0.0142345	-0.0567987	-0.056373	-0.00212465		-7.52721e-05	0.00796461	-0.00564649	-0.0393829
985	R09-E-08	YOL039W	RPP2A	non-essential					0.805	0.773	0.716	0.686	0.69		0.978	0.958	0.902	0.811	0.692		0.0142629	-0.0413882	-0.00114357	0.0628592		-0.00339706	-0.00823065	-0.00897212	-0.0488967
986	R11-C-01	YCR008W	SAT4	non-essential					0.913	0.878	0.816	0.713	0.569		0.965	0.924	0.867	0.772	0.641		0.0147507	-0.0439042	-0.0834111	-0.213385		0.0191278	-0.0112653	-0.0212986	-0.0839865
987	R11-D-10	YOR061W	CKA2	non-essential					0.839	0.805	0.899	0.809	0.766		0.972	0.94	0.896	0.798	0.716		0.0155803	0.130579	0.116181	0.128374		0.00943847	0.00411532	-0.00603374	0.00355698
988	R10-C-06	YOR039W	CKB2	non-essential					0.793	0.758	0.736	0.681	0.629		0.958	0.918	0.87	0.77	0.699		0.0178839	-0.00220008	0.00919099	-0.00150465		0.0182464	-0.00158209	-0.0174314	0.00313591
989	R09-H-06	YLR342W	FKS1	non-essential					0.917	0.877	0.84	0.756	0.669		0.916	0.898	0.86	0.773	0.638		0.020159	-0.0156215	-0.0289587	-0.079656		-0.0039556	0.0084237	0.00742313	-0.0606807
990	R10-B-05	YDR502C	SAM2	non-essential					0.905	0.865	0.851	0.783	0.725		0.969	0.938	0.898	0.812	0.739		0.0204723	0.0100664	0.0177705	0.00784497		0.00845666	0.00845666	0.0134072	0.0377046
991	R11-H-06	YLR148W	PEP3/VPS18	non-essential					1.009	0.965	0.85	0.764	0.669		0.983	0.912	0.856	0.779	0.696		0.022167	-0.10132	-0.116056	-0.176679		0.0503887	-0.0108298	4.97143e-05	0.00530013
992	R09-D-12	YGR192C	TDH3	non-essential					0.966	0.923	0.844	0.783	0.78		0.953	0.927	0.911	0.829	0.701		0.0221872	-0.0618082	-0.0461766	0.0168422		0.0035727	0.0345612	0.0460747	-0.00359231
993	R09-C-10	YER070W	RNR1	non-essential					0.703	0.665	0.584	0.581	0.569		0.936	0.9	0.868	0.808	0.669		0.0235413	-0.0718047	-0.0123427	0.0214556		0.0145701	0.0152182	0.0486258	-0.0196193
994	R10-E-03	YGR057C	LST7	non-essential					0.842	0.8	0.774	0.695	0.588		1.006	0.964	0.925	0.837	0.739		0.0243222	-0.00547147	-0.0197458	-0.102188		0.0191562	0.0110393	0.0168636	0.0102204
995	R11-F-02	YOL138C	RTC1	non-essential					0.627	0.59	0.521	0.453	0.366		0.963	0.917	0.832	0.722	0.607		0.0244231	-0.0604622	-0.0884614	-0.165085		0.0244634	-0.0428413	-0.0757803	-0.123941
996	R11-B-09	YKL048C	ELM1	non-essential					0.851	0.808	0.874	0.777	0.74		0.973	0.922	0.876	0.789	0.708		0.0251898	0.0989585	0.0731709	0.0905834		0.0294979	0.000871092	0.00185513	0.0114424
997	R10-F-05	YJL178C	ATG27	non-essential					0.783	0.741	0.742	0.703	0.705		0.954	0.927	0.89	0.812	0.742		0.0258627	0.023338	0.0552294	0.118034		0.00460469	0.0111759	0.0250351	0.0535108
998	R10-C-03	YBR101C	FES1	non-essential					0.922	0.875	0.86	0.803	0.754		0.968	0.965	0.933	0.855	0.773		0.0277462	0.00923358	0.0315591	0.0352811		-0.0211166	0.0188909	0.0380838	0.0565171
999	R09-E-01	YJR009C	TDH2	non-essential					0.954	0.9	0.803	0.802	0.78		0.966	0.95	0.813	0.829	0.719		0.0346284	-0.0828825	0.00275497	0.0422005		-0.00732431	-0.0988831	0.0217618	-0.00283557
1000	R11-D-03	YIL033C	BCY1	non-essential					0.677	0.628	0.601	0.511	0.528		1.033	0.986	0.848	0.691	0.646		0.0363481	-0.0117583	-0.0583975	0.00787275		0.0237642	-0.0979626	-0.187085	-0.142562
1001	R01-E-02	YFR036W	CDC26	non-essential					0.988	0.931	0.911	0.818	0.697		0.99	0.973	0.95	0.853	0.74		0.0370483	0.00524922	-0.0115725	-0.102058		-0.0068694	0.0293652	0.0271518	0.00209944
1002	R09-F-02	YPL195W	APL5	non-essential					0.957	0.9	0.808	0.778	0.751		0.972	0.949	0.707	0.81	0.693		0.0378577	-0.07722	-0.0270217	0.00373897		-7.52721e-05	-0.215866	-0.000696	-0.0379902
1003	R09-E-07	YNL135C	FPR1	non-essential					0.866	0.81	0.776	0.742	0.712		0.985	0.963	0.907	0.823	0.713		0.0391311	-0.0142318	0.0275415	0.0512431		-0.00145853	-0.00794813	0.000593955	-0.0249342
1004	R09-A-07	YHR025W	THR1	non-essential					0.224	0.181	0.161	0.172	0.156		0.876	0.901	0.885	0.811	0.659		0.0415605	-0.017226	0.0138405	0.00733757		-0.0484065	0.0330921	0.0512816	-0.034604
1005	R09-B-11	YOR109W	INP53	non-essential					0.49	0.439	0.378	0.355	0.393		0.952	0.916	0.865	0.728	0.572		0.0434356	-0.0559272	-0.0435666	0.0372069		0.0141686	-0.00503586	-0.0672974	-0.17163
1006	R12-A-06	YDR202C	RAV2	non-essential					0.856	0.796	0.78	0.731	0.633		0.988	0.919	0.888	0.8	0.705		0.0438024	0.00573369	0.0293294	-0.038096		0.0481491	0.0174054	0.0186402	0.0104354
1007	R12-A-08	YGL212W	VAM7	non-essential					0.887	0.823	0.793	0.739	0.662		0.967	0.911	0.871	0.781	0.695		0.0474031	-0.00931224	0.00948646	-0.0294029		0.0349339	0.00693107	0.00358204	0.00496446
1008	R09-F-07	YDR080W	VPS41	non-essential					0.919	0.85	0.8	0.721	0.706		0.959	0.941	0.884	0.795	0.672		0.0520803	-0.0311532	-0.0426145	-0.000815935		-0.00503451	-0.0103048	-0.0108037	-0.0587814
1009	R09-D-03	YBL039C	URA7	non-essential					0.948	0.878	0.823	0.772	0.745		0.966	0.945	0.875	0.831	0.707		0.0524256	-0.0359766	-0.0102101	0.0200372		-0.00203889	-0.0245554	0.0295224	-0.0142633
1010	R10-C-05	YGL019W	CKB1	non-essential					0.808	0.739	0.716	0.63	0.541		0.945	0.892	0.838	0.714	0.613		0.0549784	-0.00390195	-0.0331363	-0.0972673		0.0323147	-0.00973269	-0.0592542	-0.0891571
1011	R09-B-05	YOR089C	VPS21	non-essential					0.914	0.84	0.793	0.73	0.722		0.979	0.961	0.937	0.828	0.687		0.0577235	-0.0280554	-0.0204229	0.0314296		-0.00553632	0.0275736	0.00889624	-0.0590317
1012	R09-F-01	YNL243W	SLA2	non-essential					0.99	0.914	0.77	0.763	0.646		0.988	1.014	0.748	0.83	0.656		0.0579443	-0.135691	-0.0610676	-0.150954		-0.0522738	-0.238919	-0.0446539	-0.158233
1013	R03-C-01	YNL138W	SRV2	non-essential					0.761	0.689	0.654	0.632	0.548		1.004	0.988	0.955	0.857	0.745		0.0595132	-0.0189903	0.0244719	-0.0328567		-0.00827775	0.0190769	0.0162461	-0.00679301
1014	R10-F-01	YPL006W	NCR1	non-essential					1.008	0.928	0.91	0.832	0.774		0.994	0.977	0.932	0.835	0.757		0.0618844	0.00742432	0.00910481	0.00337195		-0.00696976	0.00509236	0.000646286	0.021548
1015	R10-G-05	YMR216C	SKY1	non-essential					0.51	0.442	0.432	0.407	0.387		0.884	0.87	0.843	0.751	0.668		0.0616566	0.00192039	0.0176419	0.0259418		-0.00738103	0.0190911	0.00979371	0.0107004
1016	R09-C-06	YPR159W	KRE6	non-essential					0.803	0.722	0.665	0.618	0.627		0.977	0.944	0.909	0.82	0.705		0.0683394	-0.0429165	-0.0292815	0.0355341		0.0103701	0.0143636	0.0169657	-0.0159917
1017	R10-G-07	YKL126W	YPK1	non-essential					0.395	0.314	0.268	0.291	0.195		0.931	0.895	0.866	0.781	0.672		0.0789921	-0.0426855	0.0148459	-0.0875756		0.0146955	0.0182765	0.0204954	-0.0101556
1018	R10-F-04	YDL130W	RPP1B	non-essential					0.937	0.833	0.827	0.762	0.698		0.952	0.925	0.881	0.79	0.701		0.0901991	0.0181675	0.0269971	0.00731709		0.00465487	0.00326777	-7.84962e-05	-0.00147815		1
1019	R09-H-02	YGL124C	MON1	non-essential					0.952	0.84	0.758	0.749	0.712		0.98	0.964	0.78	0.84	0.704		0.0986277	-0.067693	0.0031503	0.018167		-0.00767557	-0.150431	0.0205765	-0.0385261		1
1020	R09-G-01	YLR396C	VPS33	non-essential					0.999	0.881	0.714	0.724	0.658		0.976	0.909	0.797	0.777	0.657		0.104016	-0.162727	-0.073071	-0.098655		0.046336	-0.0733601	0.000745714	-0.0458462		1
1021	R09-D-06	YHR183W	GND1	non-essential					0.887	0.77	0.74	0.713	0.628		0.943	0.897	0.874	0.804	0.665		0.105838	-0.0109005	0.0356628	-0.0160613		0.0249653	0.025071	0.0468465	-0.0220191		1
1022	R10-A-06	YOL115W	PAP2	non-essential					0.961	0.841	0.782	0.721	0.721		0.951	0.927	0.888	0.809	0.742		0.107213	-0.0416154	-0.0326917	0.0290008		0.00150872	0.00894871	0.0213222	0.0535108		1
1023	R09-B-09	YMR304W	UBP15	non-essential					0.482	0.37	0.339	0.367	0.374		0.965	0.903	0.874	0.805	0.67		0.110899	-0.0240198	0.0473967	0.088083		0.0413266	0.0187285	0.0417417	-0.0213978		1
1024	R10-A-12	YHR066W	SSF1	non-essential					1.005	0.874	0.852	0.793	0.783		0.965	0.913	0.886	0.81	0.733		0.118192	0.00127609	0.0202547	0.0748452		0.0307558	0.0215207	0.037359	0.0557751		1
1025	R10-F-12	YAL023C	PMT2	non-essential					0.928	0.798	0.795	0.748	0.684		0.952	0.91	0.881	0.795	0.706		0.1191	0.0205162	0.0482161	0.0273382		0.0205111	0.019124	0.0219659	0.0213419		1
1026	R09-F-10	YLR240W	VPS34	non-essential					0.902	0.729	0.671	0.63	0.652		0.969	0.926	0.881	0.8	0.662		0.167188	-0.0438392	-0.0221109	0.0609729		0.0211416	0.00221069	0.0112407	-0.0568528		1
1027	R09-F-11	YBR179C	FZO1	non-essential					0.883	0.691	0.588	0.551	0.504		0.98	0.945	0.851	0.754	0.589		0.188632	-0.0959406	-0.0782294	-0.0934172		0.012409	-0.0512814	-0.0657746	-0.178609		1
1028	R09-E-10	YBR009C	HHF1	non-essential					0.681	0.481	0.466	0.484	0.393		0.931	0.908	0.884	0.818	0.671		0.202727	-0.00257342	0.0701765	-0.00909958		0.000953447	0.0245789	0.0525454	-0.0252905		1
1029	R11-A-04	YOR322C	LDB19	non-essential					1.005	0.757	0.54	0.486	0.579		0.981	0.911	0.846	0.77	0.708		0.247189	-0.223068	-0.231642	-0.0667151		0.0493818	-0.0209086	-0.0100318	0.0230703		1
1030	R12-A-12	YKL119C	VPH2	non-essential					0.994	0.923	0.902	0.836	0.707		0.998	0.911	0.867	0.766	0.673		0.0523271	0.00387698	0.0195803	-0.0799748		0.0669256	0.00247673	-0.0149823	-0.0256762		1
1031	R10-C-01	YPL031C	PHO85	non-essential					1.024	0.83	0.812	0.722	0.647		0.955	0.866	0.829	0.757	0.694		0.187156	0.00448756	-0.0193231	-0.0570146		0.0701187	0.00772918	0.0214478	0.0511404		1
1032	R02-B-07	YLR268W	SEC22	non-essential					0.266	0.223	0.195	0.282	0.237		0.785	0.696	0.722	0.723	0.645		0.0404639	-0.0250274	0.10401	0.0684581		0.0743841	0.0682795	0.159073	0.162599		1
1033	R06-B-08	YGR271C-A	EFG1	non-essential					0.862	0.429	0.378	0.321	0.38		0.957	0.854	0.822	0.73	0.683		0.454892	-0.0449018	-0.0747248	0.0309909		0.0848677	0.0126191	0.000716932	0.0485051		1
1034	R10-G-02	YGR162W	TIF4631	non-essential					0.65	0.408	0.345	0.291	0.318		0.95	0.839	0.8	0.709	0.616		0.249842	-0.0591211	-0.0887924	-0.028084		0.0935	0.00397642	-0.00941693	-0.0289535		1
1035	R05-A-12	YBL093C	ROX3	non-essential					0.935	0.53	0.507	0.495	0.484		0.944	0.804	0.788	0.735	0.633		0.422115	-0.0101651	0.0297999	0.0575658		0.124306	0.0276113	0.0597592	0.0317213		1
1036	R04-A-07	YBR156C	SLI15	non-essential					0.95	0.449	0.334	0.286	0.426		0.977	0.783	0.646	0.589	0.651		0.527566	-0.116783	-0.1402	0.0699481		0.18056	-0.108319	-0.0987352	0.0789897		1
1037	R11-A-07	YOR233W	KIN4	non-essential					0.979	0.662	0.506	0.453	0.539		0.98	0.709	0.641	0.601	0.601		0.323943	-0.156832	-0.167844	-0.0150246		0.26188	-0.035663	-0.00565958	0.0875759		1
1038	R07-B-08	YHR005C	GPA1	non-essential					0.933	0.485	0.41	0.338	0.403		0.965	0.657	0.6	0.531	0.517		0.469576	-0.0704037	-0.115375	-0.00024712		0.301369	-0.0263517	-0.037325	0.0255525		1
1039	R11-C-02	YKL139W	CTK1	non-essential					0.794	0.287	0.25	0.228	0.265		0.964	0.496	0.339	0.291	0.362		0.538255	-0.0333021	-0.0335494	0.0350311		0.470527	-0.146807	-0.164164	-0.0201346		1
1040	R09-A-08	YIL105C	SLM1	non-essential					0.21	0.093	0.067	0.065	0.081		0.856	0.227	0.136	0.106	0.137		0.123514	-0.0266581	-0.0218907	0.00489122		0.643427	-0.0885101	-0.10877	-0.0491499		1
1041	R09-A-11	YGL180W	ATG1	non-essential					0.173	0.128	0.108	0.107	0.13		0.7	0.32	0.19	0.137	0.195		0.0450972	-0.0188143	-0.00837024	0.0312892		0.384128	-0.126685	-0.168712	-0.0666786		1
1042	R07-B-10	YFL031W	HAC1	non-essential					0.272	0.108	0.121	0.114	0.136		0.886	0.546	0.559	0.515	0.449		0.173714	0.017959	0.0223653	0.0612975		0.337178	0.0453274	0.0602092	0.0481812		1
1043	R10-A-03	YML071C	COG8	non-essential					0.822	0.224	0.182	0.164	0.21		0.95	0.711	0.608	0.549	0.649		0.637854	-0.0408525	-0.0434941	0.0315466		0.228807	-0.0745255	-0.0721302	0.152314		1	5
1044	R11-D-02	YGL223C	COG1	non-essential					0.902	0.3	0.267	0.271	0.325		0.97	0.685	0.624	0.568	0.496		0.640176	-0.0283825	0.00546754	0.100274		0.276931	-0.029224	-0.0211312	-0.0332937		1	5
1045	R10-G-01	YPR036W	VMA13	non-essential					0.906	0.882	0.861	0.789	0.729		0.98	0.956	0.924	0.827	0.744		0.00280559	0.00264833	0.00647158	-0.0055931		0.000781085	0.0183824	0.012944	0.0256409			4
1046	R09-B-03	YOR332W	VMA4	non-essential					0.627	0.612	0.565	0.502	0.493		0.963	0.942	0.91	0.791	0.629		0.000167339	-0.0348878	-0.0519231	-0.0209058		-0.00196362	0.0175914	-0.0168113	-0.119727			4
1047	R11-E-04	YGR020C	VMA7	non-essential					0.172	0.139	0.116	0.105	0.099		0.817	0.727	0.666	0.564	0.529		0.0318928	-0.0218822	-0.0229795	-0.0219527		0.0746383	-0.0268508	-0.0704791	-0.0317301		1	4
1048	R12-A-07	YLR447C	VMA6	non-essential					0.237	0.176	0.172	0.167	0.157		0.836	0.725	0.698	0.64	0.532		0.0610667	0.00074418	0.0131497	0.0141765		0.0963603	0.0108981	0.0256944	-0.0254377		1	4
1049	R10-F-11	YOR270C	VPH1	non-essential					0.909	0.813	0.81	0.74	0.694		0.972	0.947	0.907	0.797	0.714		0.0821098	0.0209657	0.0217525	0.0240628		0.00203889	0.00896519	-0.0146709	-0.00662811		1	4
1050	R12-B-02	YHR039C-A	VMA10	non-essential					0.21	0.129	0.121	0.106	0.114		0.834	0.599	0.558	0.485	0.472		0.0838224	-0.00519428	-0.0107135	0.00896651		0.227489	-0.0118115	-0.0329449	0.0241892		1	4
1051	R09-G-05	YHR060W	VMA22	non-essential					0.846	0.74	0.676	0.625	0.56		0.982	0.933	0.785	0.778	0.61		0.0947801	-0.0503046	-0.0404423	-0.0731709		0.027158	-0.112093	-0.0233866	-0.136676		1	4
1052	R09-F-04	YBR127C	VMA2	non-essential					0.195	0.096	0.078	0.08	0.089		0.886	0.486	0.354	0.365	0.399		0.10406	-0.0175082	-0.00658786	0.0121937		0.400603	-0.119533	-0.0620094	0.0419682		1	4
1053	R09-E-12	YDL185W	VMA1	non-essential					0.219	0.076	0.062	0.062	0.072		0.876	0.29	0.257	0.211	0.245		0.151945	-0.0135775	-0.00686965	0.011698		0.597471	-0.0203624	-0.0454153	0.0346717		1	4
1054	R09-B-01	YKL080W	VMA5	non-essential					0.438	0.242	0.189	0.162	0.212		0.982	0.804	0.699	0.58	0.514		0.204661	-0.0527706	-0.0658211	0.0143534		0.163522	-0.0714979	-0.132073	-0.134017		1	4
1055	R09-B-02	YEL051W	VMA8	non-essential					0.611	0.277	0.202	0.161	0.239		0.971	0.795	0.741	0.684	0.542		0.352294	-0.0766369	-0.105651	0.0115737		0.161683	-0.0152135	0.0061541	-0.0855059		1	4
1056	R10-B-04	YAL012W	CYS3	non-essential					0.794	0.609	0.604	0.542	0.537		0.92	0.871	0.838	0.759	0.673		0.183238	0.0125874	0.00101225	0.0407573		0.0287136	0.012466	0.0186376	0.0166071		1
1057	R09-A-06	YGR155W	CYS4	non-essential					0.914	0.434	0.419	0.438	0.421		0.951	0.723	0.726	0.728	0.538		0.505353	-0.00398186	0.0649238	0.0798549		0.217154	0.0441926	0.136719	-0.014967		1
1068	R09-C-01	YDR495C	VPS3	non-essential					0.443	0.446	0.382	0.342	0.326		0.983	0.946	0.847	0.67	0.443		-0.0148741	-0.0591149	-0.0674134	-0.0593702		0.0144479	-0.0567929	-0.170792	-0.383008
1070	R11-B-05	YMR104C	YPK2	non-essential					0.523	0.554	0.665	0.701	0.676		0.904	0.897	0.895	0.878	0.788		-0.0478339	0.14231	0.258922	0.285747		-0.0152824	0.0484563	0.138431	0.14929
1071	R11-F-09	YLR189C	ATG26	non-essential					0.541	0.542	0.707	0.736	0.716		0.996	0.991	0.955	0.853	0.779		-0.0152278	0.203105	0.315577	0.352028		-0.0197049	0.0159057	0.00812436	0.0373895
1058	R10-A-09	YCR053W	THR4	non-essential					0.565	0.182	0.155	0.153	0.135		0.838	0.713	0.71	0.617	0.54		0.407519	-0.0251236	-0.0108352	-0.0216164		0.111109	0.0369461	0.00991407	-0.00161065		1	3
1059	R09-D-11	YJR139C	HOM6	non-essential					0.815	0.225	0.255	0.236	0.241		0.974	0.566	0.776	0.777	0.662		0.629217	0.0407177	0.0447334	0.0715581		0.406851	0.265834	0.363325	0.323697		1	3
1060	R10-B-10	YDR158W	HOM2	non-essential					0.916	0.538	0.439	0.347	0.336		0.956	0.793	0.722	0.615	0.568		0.392842	-0.0959955	-0.162643	-0.147541		0.148318	-0.0342575	-0.0771278	-0.04718		1	3
1061	R09-D-04	YER052C	HOM3	non-essential					0.947	0.648	0.479	0.353	0.407		0.964	0.888	0.811	0.68	0.584		0.304932	-0.171974	-0.276478	-0.174655		0.0561508	-0.0355712	-0.0971051	-0.125319		1	3
1062	R10-C-02	YGR208W	SER2	non-essential					0.933	0.645	0.5	0.344	0.377		0.951	0.911	0.856	0.779	0.699		0.29317	-0.144884	-0.284337	-0.211136		0.018422	-0.00977272	0.0011068	0.0105355		1	3
1063	R11-A-08	YPL180W	TCO89	non-essential					0.93	0.541	0.428	0.388	0.492		0.978	0.783	0.621	0.542	0.638		0.404605	-0.111761	-0.115082	0.056048		0.181592	-0.136159	-0.156903	0.0608838		1
1069	R11-B-11	YEL062W	NPR2	non-essential					0.69	0.613	0.667	0.685	0.678		0.972	0.967	0.924	0.822	0.747		0.0668797	0.0795249	0.174021	0.22335		-0.0191028	0.0067545	-0.004872	0.0181912			2
1064	R10-D-10	YML121W	GTR1	non-essential					0.816	0.411	0.358	0.228	0.152		0.971	0.91	0.869	0.476	0.282		0.425222	-0.0477062	-0.170264	-0.251551		0.040119	0.00576098	-0.372836	-0.569187		1	2
1065	R11-D-09	YGR163W	GTR2	non-essential					0.806	0.628	0.534	0.341	0.224		0.985	0.969	0.922	0.803	0.362		0.175207	-0.087636	-0.269316	-0.39531		-0.00780103	0.00241316	-0.030501	-0.520135		1	2
1066	R11-H-01	YKR007W	MEH1/EGO1	non-essential					1.011	0.845	0.635	0.429	0.278		0.994	0.973	0.919	0.771	0.392		0.156624	-0.212503	-0.399385	-0.562943		-0.00274143	-0.00515593	-0.0743333	-0.48258		1	2
1067	R11-H-02	YBR077C	SLM4/EGO3	non-essential					1.002	0.932	0.705	0.498	0.319		0.986	0.979	0.926	0.835	0.449		0.0510157	-0.229149	-0.409697	-0.604486		-0.0173399	-0.00370332	-0.00146788	-0.409536			2
								3rd quaritle	0.976	0.956	0.928	0.845	0.79		0.978	0.959	0.916	0.824	0.735
								1st quartile	0.85	0.791	0.742	0.707	0.648		0.957	0.926	0.879	0.788	0.687
								NE median	0.929	0.907	0.883	0.806	0.754		0.969	0.946	0.898	0.808	0.718												1	noticeable growth inhibition by 25 µM auxin at 20 or 40 hr
									0	-0.0236814	-0.0495156	-0.1324	-0.188375		0	-0.0237358	-0.0732714	-0.166151	-0.25903												2	EGO-GTR regulators of TORC1
																															3	Cys, Ser, Thr biosynthesis proteins
																															4	V-ATPase subunits
																															5	COG subunits
																															6	Growth inhibition by high auxin but not NAA
